# Supplementary material for: Copy-number and gene dependency analysis reveals partial copy loss of wild-type SF3B1 as a novel cancer vulnerability
Source: eLife journal article supplement (doi:10.7554/elife.23268), 2017-02-08
Supplement: supp [file elife-23268-supp-v1.zip]

**Figure 6-figure supplement 1**

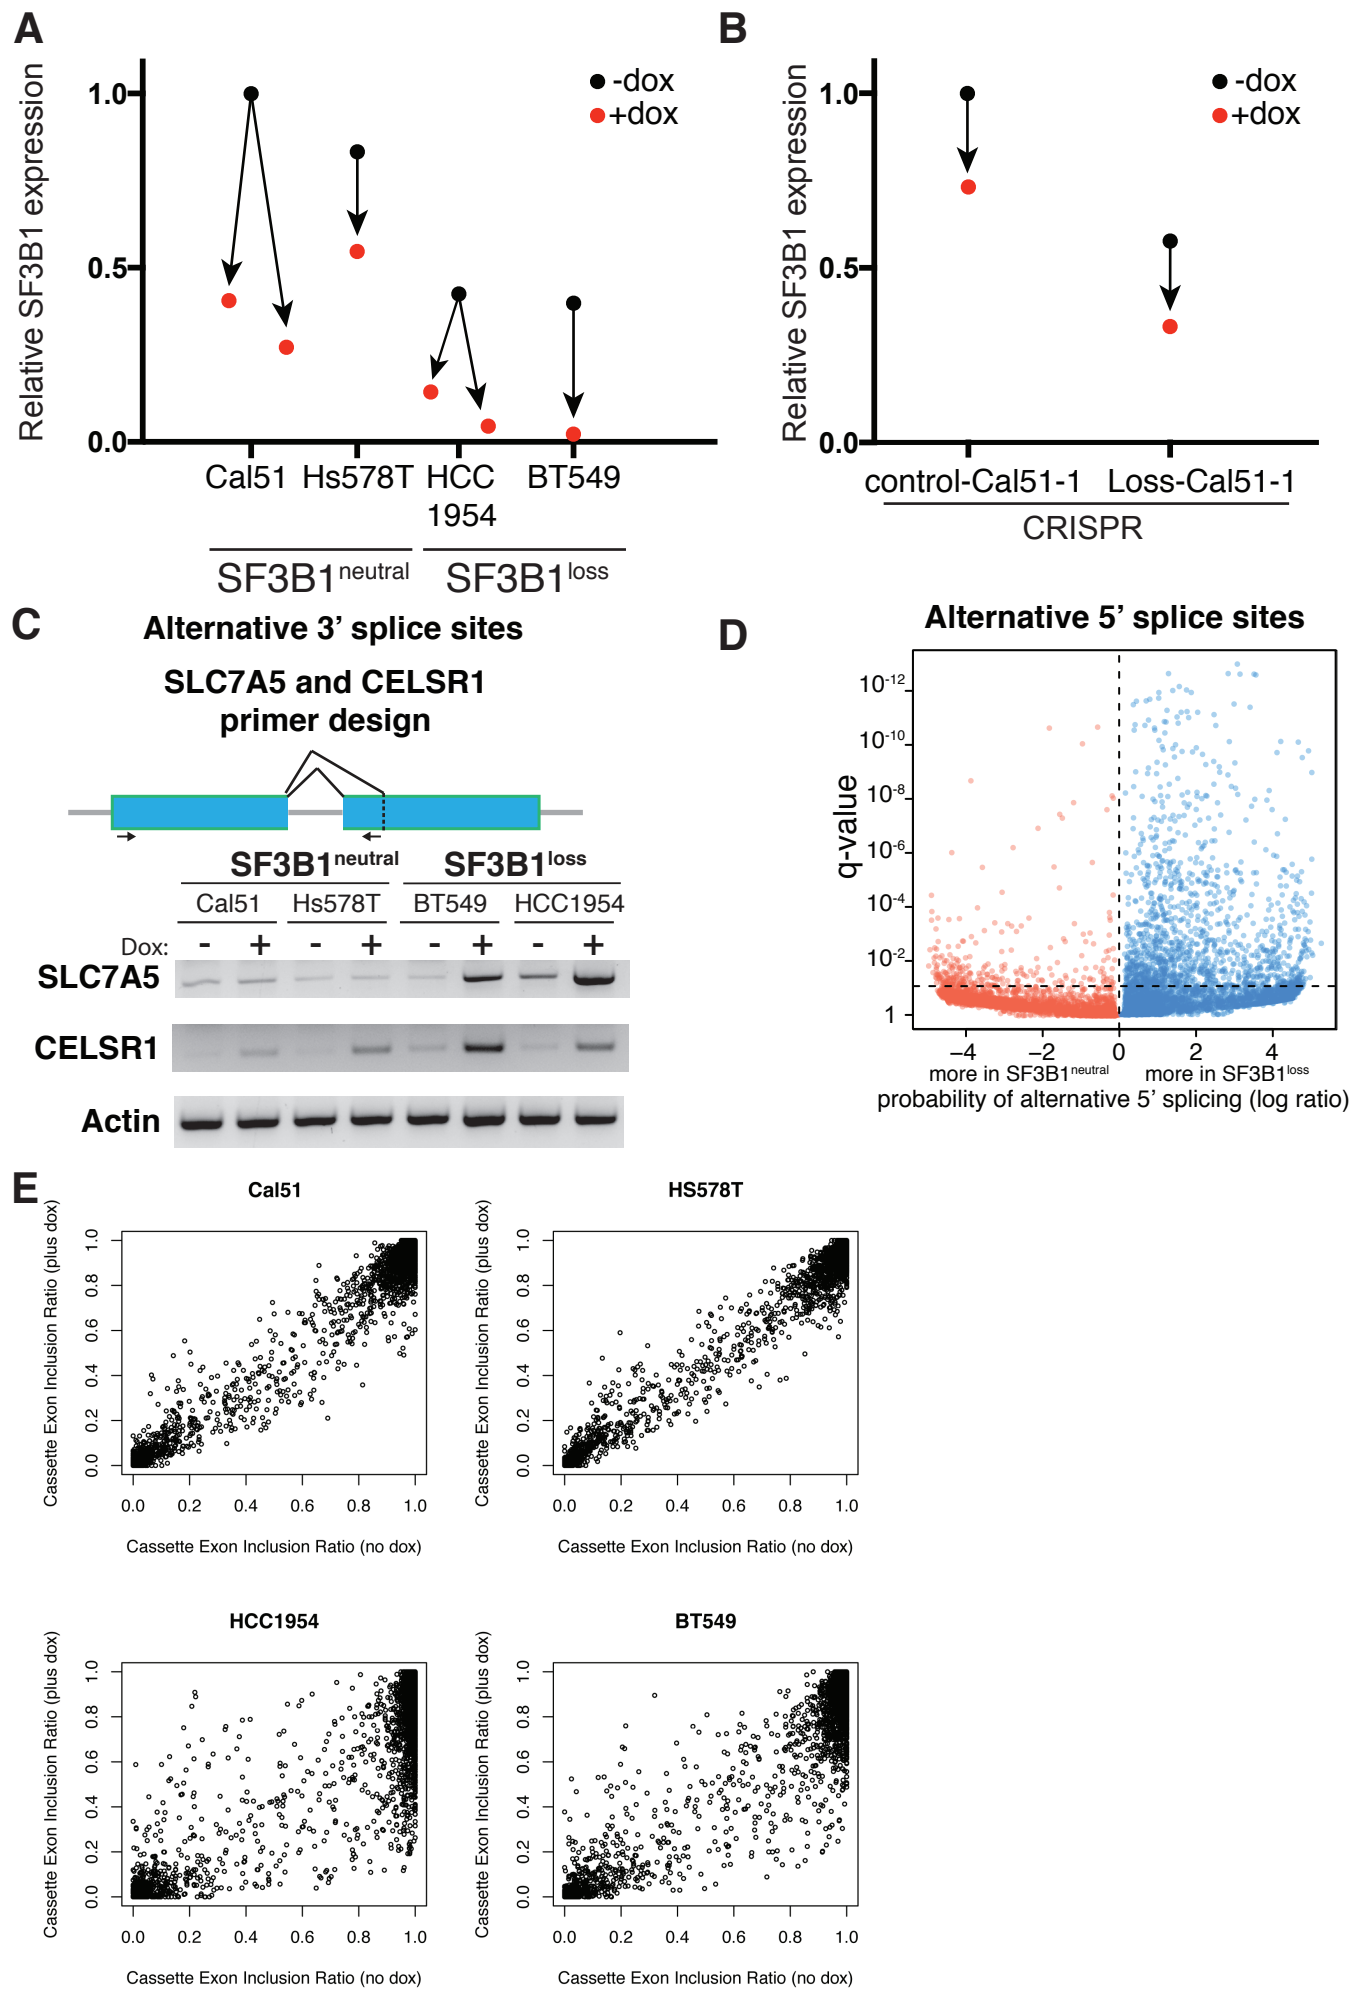

**Figure 6-figure supplement 1. Partial SF3B1 suppression results in splicing defects in SF3B1<sup>loss</sup> cells**
