# Supplementary material for: Copy-number and gene dependency analysis reveals partial copy loss of wild-type SF3B1 as a novel cancer vulnerability
Source: eLife journal article supplement (doi:10.7554/elife.23268), 2017-02-08
Supplement: supp [file elife-23268-supp-v1.zip]

# Figure 4-figure supplement 1

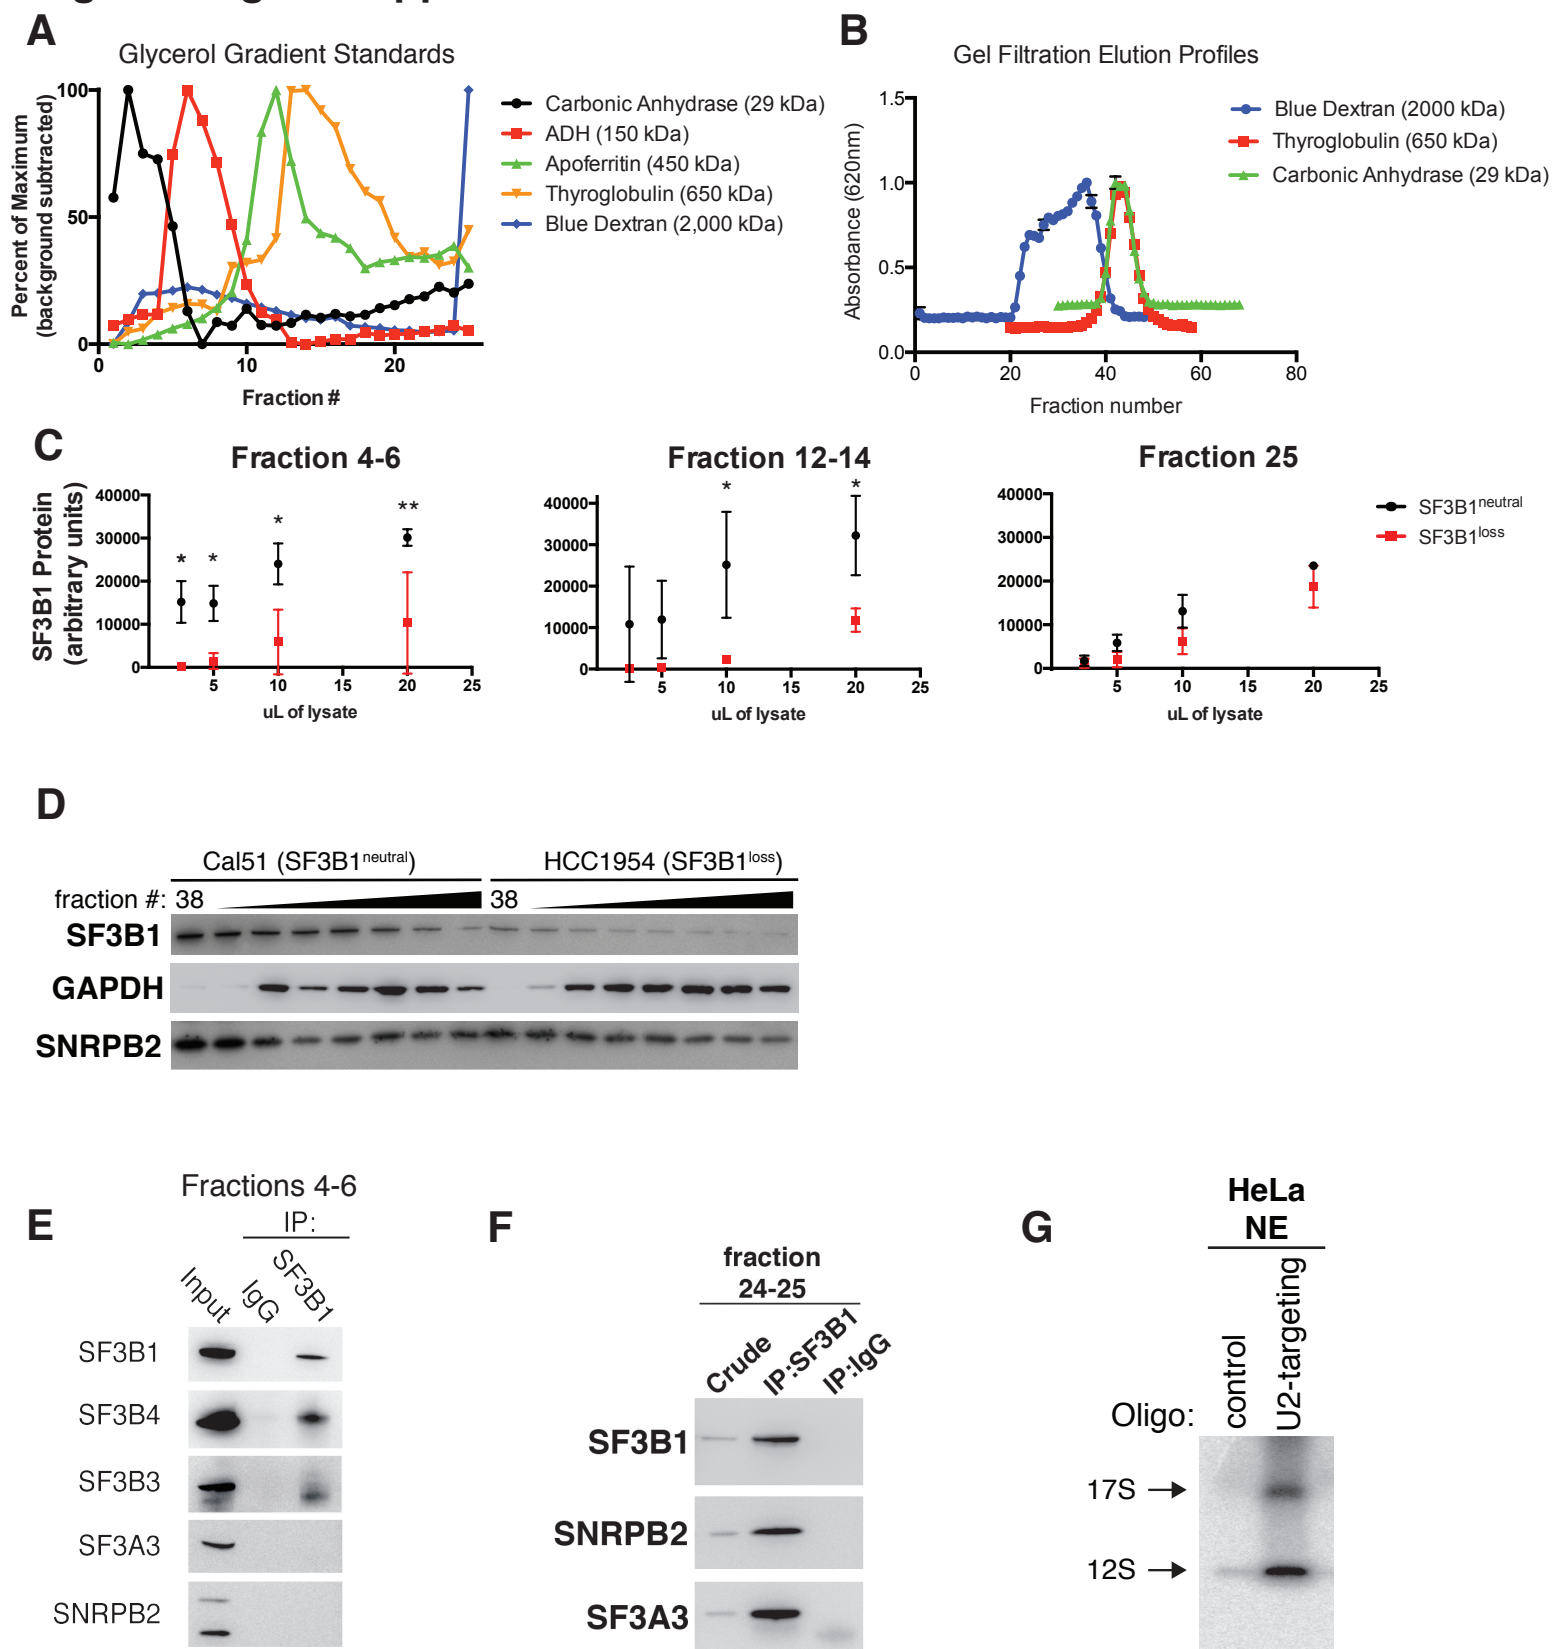

Figure 4-figure supplement 1. SF3B1 copy-loss selectively reduces the abundance of the SF3b complex
