# Supplementary material for: Copy-number and gene dependency analysis reveals partial copy loss of wild-type SF3B1 as a novel cancer vulnerability
Source: eLife. 2017 Feb 8;6:e23268. doi: 10.7554/eLife.23268 (PMC5357138; doi:10.7554/eLife.23268)
Supplement: Supplementary file 1. — (A) Results of copy-number associated dependencies. (B) Results of CYCLOPS gene analysis. (C) Frequency of genetic SF3B1 alterations in cancer. (D) KEGG Pathways Enriched from significant candidate CYCLOPS genes. (E) Significantly differentially expressed genes after SF3B1 suppression in SF3B1neutral and SF3B1loss cells. (F) Summary of KEGG pathway enrichment from differentially expressed genes in each class (SF3B1loss or SF3B1neutral) from genes in Supplementary file E. (G) Significantly differentially expressed genes after enhanced SF3B1 expression. (H) PCR primer sequences used in this study. DOI: http://dx.doi.org/10.7554/eLife.23268.019 [file elife-23268-supp1.xlsx]

## Sheet: Supplementary file 1A
Supplementary file 1A
Copy-number associated dependencies
Dependency gene	Chromosomal location*	cis/trans	CYCLOPS?	Copy-number region associated with dependency (chr:min pos-max pos)	Significance (FDR q-value)	Strength of association (Pearson r-value)	Paralog in associated region	Signficance in CYCLOPS analysis
CD163	12	trans	no	9:32625667-35473026	3.6731e-06	0.553453		n/a
NUMBL	19	trans	no	8:1238234-38037040	0.000198706	0.521178		n/a
ANAPC11	17	trans	no	8:6680576-22454582	0.0010256	0.506826		n/a
FUBP1	1	trans	no	19:2183577-7976529	0.0015221	0.503271	KHSRP	n/a
SF3B1	2	trans	no	8:117837243-124734371	0.00606021	-0.490496		n/a
MAGOHB	12	trans	no	1:52229024-60000990	0.00870604	0.487057	MAGOH	n/a
GTF2F1	19	trans	no	8:122722811-124818828	0.0149837	-0.48183		n/a
HGS	17	trans	no	8:187339-11891169	0.0150872	0.481763		n/a
AMPD1	1	trans	no	19:2869474-7976529	0.0171397	0.480522		n/a
AMPD1	1	trans	no	8:23371189-33576981	0.0171397	0.480522		n/a
FOXB1	15	trans	no	19:1726444-4621415	0.0208722	0.478595		n/a
SMC2	9	trans	no	8:140784481-142586512	0.0306801	-0.474793		n/a
RPS12	6	trans	no	8:133756995-142275082	0.0352944	-0.473398		n/a
PPP2CA	5	trans	no	8:30744062-31150819	0.0407103	0.471971	PPP2CB	n/a
ETNK1	12	trans	no	8:28104588-28966161	0.0438658	0.471222		n/a
SSRP1	11	trans	no	8:140784481-142586512	0.0725061	-0.466132		n/a
EGFLAM	5	trans	no	18:35585957-35585957	0.0781581	0.465364		n/a
XPNPEP3	22	trans	no	8:17024519-18303003	0.0824904	0.464811		n/a
RAB35	12	trans	no	8:73150373-74953664	0.0878965	0.464159		n/a
SNRPN	15	trans	no	8:139995418-139995418	0.0925352	-0.46363		n/a
SNURF	15	trans	no	8:139995418-139995418	0.0925352	-0.46363		n/a
ZZEF1	17	trans	no	8:30744062-31150819	0.0931387	0.463563		n/a
TOP2A	17	trans	no	8:142275082-144370419	0.0999623	-0.462835		n/a
CXCR6	3	trans	no	17:7599011-7599011	0.108415	-0.461995		n/a
MYCBP2	13	trans	no	8:33450206-33576981	0.114852	0.461398		n/a
NUDT10	23	trans	no	12:13420946-15265678	0.117675	0.461146		n/a
NUDT11	23	trans	no	12:13420946-15265678	0.117675	0.461146		n/a
PSMD12	17	trans	no	8:7200286-7200286	0.140009	0.459337		n/a
TSG101	11	trans	no	8:7892453-10734709	0.159112	0.457999		n/a
PSMC6	14	trans	no	8:133930234-133930234	0.180173	-0.456693		n/a
OR1N2	9	trans	no	8:30789894-31150819	0.202495	-0.455461		n/a
MAGEC3	23	trans	no	17:55396899-55451118	0.230444	-0.454091		n/a
ALG13	23	trans	no	5:167831886-167831886	0.245535	0.453417		n/a
LSM5	7	cis	yes	7:32501395-32590304	0.00849282	0.487293		0.0306373
SNRPB	20	cis	yes	20:25296-6708910	0.104878	0.462339		0.00774286
SF3A2	19	cis	yes	19:2201717-2429257	0.153184	0.458397		0.0730385
SNRPF	12	cis	yes	12:93568455-94135371	0.173385	0.457097		0.237264
TUBGCP3	13	cis	yes	13:112137010-112290482	0.204155	0.455375		0.0386105
TOP2A	17	cis	yes	17:35975262-37928123	0.206775	0.45524		0.00542
NAA38	7	cis	yes	7:117631329-117670020	0.210793	0.455036		0.0143471
POLR2A	17	cis	yes	17:5968471-15407670	0.23347	0.453953		0.0125077
NHP2L1	22	cis	yes	22:31784377-49568953	0.234235	0.453918		0.00542
PSMC2	7	cis	yes	7:97207720-127930214	0.24321	0.453518		0.00542
SHFM1	7	cis	yes	7:90736068-101059296	0.243773	0.453494		0.00774286
PHF5A	22	cis	yes	22:30344534-41341343	0.243941	0.453486		0.00542
RPS15	19	cis	yes	19:1767237-3577813	0.243954	0.453486		0.062544
POLR2J	7	cis	yes	7:100263079-102576805	0.244015	0.453483		0.00542
WBP11	12	cis	yes	12:9108933-20725148	0.245008	0.45344		0.00774286
MCM7	7	cis	yes	7:104816577-104816577	0.248764	0.453278		0.109027
GFRA2	8	cis	no	8:30744062-30789894	0.197385	-0.455731		n/a
*Location of dependency gene

## Sheet: Supplementary file 1B
Supplementary file 1B
CYCLOPS Candidates
			Mean dependency score
Gene	# Cell lines with loss	# Cell lines without loss	Cell lines with loss	Cell lines without loss	CYCLOPS strength*	p-value	FDR q-value	cytoband	chr	homozygously deleted tumor suppressor on chr arm
PSMC2	20	169	-1.47468	0.0211397	-1.49582	1.10813e-07	0.00542	7q22.1	7	MLL3
SF3B1	11	178	-1.14516	0.0159536	-1.16111	0.00315853	0.00542	2q33.1	2	IKZF2
PSMD3	17	172	-0.970389	0.0210585	-0.991447	0.000451232	0.00542	17q21.1	17	NF1, BRCA1
NHP2L1	35	154	-0.792978	0.114864	-0.907842	1.18624e-06	0.00542	22q13.2	22	NF2
POLR2J	19	154	-0.806746	0.0993572	-0.906103	7.40692e-05	0.00542	7q22.1	7	MLL3
SMU1	36	153	-0.807033	0.0717142	-0.878747	0.000212356	0.00542	9p21.1	9	CDKN2A, CDKN2B
EIF3F	35	154	-0.808148	0.0380902	-0.846238	0.000149917	0.00542	11p15.4	11
TOP2A	19	170	-0.79878	-0.00194497	-0.796835	0.000845864	0.00542	17q21.2	17	NF1, BRCA1
HAUS1	66	123	-0.636606	0.154679	-0.791285	2.02739e-09	0.00542	18q21.1	18	SMAD4
PFAS	58	131	-0.553993	0.191312	-0.745306	1.34902e-05	0.00542	17p13.1	17	TP53
PHF5A	35	154	-0.679068	0.0431382	-0.722206	1.89816e-05	0.00542	22q13.2	22	NF2
RPS3A	56	133	-0.58438	0.101708	-0.686088	2.73309e-05	0.00542	4q31.3	4	FAT1
TRAPPC8	49	140	-0.299817	0.117045	-0.416861	6.81275e-06	0.00542	18q12.1	18	SMAD4
PLRG1	54	135	-0.315305	0.0549281	-0.370233	0.00294624	0.00542	4q31.3	4	FAT1
SHFM1	15	174	-1.21143	0.0652634	-1.2767	0.000141316	0.00774286	7q21.3	7	MLL3
WBP11	17	172	-1.16256	0.047697	-1.21025	0.00247484	0.00774286	12p12.3	12	CDKN1B
SNRPB	19	170	-1.0289	0.0486458	-1.07755	1.59892e-06	0.00774286	20p13	20
ATP6V1B2	63	126	-0.598434	0.0909893	-0.689424	1.57029e-06	0.00774286	8p21.3	8
PRPF8	55	134	-0.439994	0.0732761	-0.51327	6.20359e-06	0.00774286	17p13.3	17	TP53
TOMM22	38	151	-0.343488	0.0804867	-0.423975	0.000170831	0.00774286	22q13.1	22	NF2
TXN	15	174	-0.993872	-0.051382	-0.94249	0.00286841	0.0106043	9q31.3	9
COPS8	25	164	-0.498367	-0.00113323	-0.497234	0.0164262	0.0106043	2q37.3	2	IKZF2
CCT6A	11	178	-1.1606	-0.0271424	-1.13345	0.000748908	0.0125077	7p11.2	7
SRP19	20	169	-0.874438	-0.0175564	-0.856881	0.000347212	0.0125077	5q22.2	5	APC
POLR2A	62	127	-0.620727	0.0934774	-0.714204	4.8264e-07	0.0125077	17p13.1	17	TP53
PSMB6	57	132	-0.813861	0.185155	-0.999016	1.16505e-05	0.0143471	17p13.2	17	TP53
HNRNPK	22	167	-0.698646	0.112433	-0.81108	0.00130893	0.0143471	9q21.32	9
HSD17B10	21	168	-0.717137	0.0126179	-0.729755	8.16164e-05	0.0143471	Xp11.22	23
NAA38	20	169	-0.641283	0.00944367	-0.650727	0.00349371	0.0143471	7q31.31	7	MLL3
ACMSD	12	177	-0.638059	0.00194948	-0.640009	0.00155077	0.0143471	2q21.3	2	IKZF2
GARS	14	175	-0.512762	0.0476965	-0.560459	0.000509759	0.0143471	7p14.3	7
LSM6	54	135	-0.474161	0.0809163	-0.555077	4.44432e-05	0.0143471	4q31.22	4	FAT1
PSMD1	20	169	-0.412979	0.0347749	-0.447754	0.000651581	0.0143471	17q11.2	17	NF1, BRCA1
SNRPC	16	173	-0.822672	0.115135	-0.937807	0.000196568	0.0158083	6p21.31	6
GTF2E2	62	127	-0.345594	0.142556	-0.48815	3.77555e-05	0.0158083	8p12	8
PZP	22	167	-0.292495	0.137226	-0.429721	0.000108206	0.0197757	12p13.31	12	CDKN1B
SNRPB2	19	170	-0.617211	0.0227875	-0.639998	0.00390916	0.0238709	20p12.1	20
SRRT	18	171	-0.9535	0.101196	-1.0547	0.000449297	0.0263827	7q22.1	7	MLL3
SF3A1	34	155	-0.630358	0.0815565	-0.711915	0.000285613	0.0263827	22q12.2	22	NF2
CKAP5	15	174	-0.762057	0.0173008	-0.779358	0.00100561	0.0268333	11p11.2	11
RNPS1	16	173	-0.606589	-0.0277434	-0.578845	0.00297534	0.0268333	16p13.3	16
FXN	23	166	-0.386459	0.00630695	-0.392766	0.00502112	0.0268333	10q26.11	10	PTEN
RPS5	13	176	-0.942867	-0.0243935	-0.918473	0.00160837	0.0276308	19q13.43	19
SMC2	15	174	-1.10343	0.0615996	-1.16503	0.000898162	0.0294904	9q31.1	9
PCNA	19	170	-0.664989	0.0381069	-0.703096	0.00141484	0.0294904	20p13	20
ZNF207	20	169	-0.535845	0.00853386	-0.544379	0.00273167	0.0294904	17q11.2	17	NF1, BRCA1
PABPN1	37	152	-0.417122	0.100308	-0.51743	0.000134029	0.0296146	14q11.2	14
PAFAH1B1	55	134	-0.589446	0.127388	-0.716834	3.33141e-05	0.0300127	17p13.3	17	TP53
PAX4	19	170	-0.365273	0.055278	-0.420551	0.000123394	0.0300127	7q32.1	7	MLL3
LSM5	14	175	-0.84373	-0.0308989	-0.812831	0.00204589	0.0306373	7p14.3	7
RRM1	37	152	-0.391706	0.0172162	-0.408923	0.000622135	0.0316522	11p15.4	11
PSMC3	13	176	-1.07735	-0.0467287	-1.03062	0.0037931	0.0334919	11p11.2	11
ZZEF1	56	133	-0.199618	0.144404	-0.344022	0.000739258	0.0345715	17p13.2	17	TP53
GLT25D2	6	183	-0.742073	0.041007	-0.78308	2.69218e-08	0.0351292	1q25.3	1
SDHAP3	6	183	-0.739209	-0.0308698	-0.708339	0.00949999	0.0351292	5p15.33	5
EIF4A1	63	126	-0.339304	0.0862915	-0.425595	0.000710578	0.0351292	17p13.1	17	TP53
HDAC2	35	154	-0.299512	0.024137	-0.323649	0.000394913	0.0351292	6q21	6	PARK2
AFG3L2	30	159	-0.460354	0.000718357	-0.461073	0.000240115	0.0375128	18p11.21	18
TXNL4A	77	112	-0.315257	0.132549	-0.447806	1.63397e-06	0.0375128	18q23	18	SMAD4
FOXRED2	37	152	-0.320669	0.101158	-0.421826	1.94816e-05	0.0377688	22q12.3	22	NF2
TUBGCP3	42	147	-0.440103	0.11345	-0.553553	7.95201e-05	0.0386105	13q34	13	RB1
POM121C	20	169	-0.620296	0.0141694	-0.634465	0.0062554	0.0399872	7q11.23	7	MLL3
PSMB1	37	152	-0.469301	0.00824513	-0.477546	9.33577e-05	0.0399872	6q27	6	PARK2
NCBP1	17	172	-0.847443	-0.0539869	-0.793456	0.00927982	0.0400774	9q22.33	9
TOPBP1	9	180	-0.636615	-0.0534858	-0.583129	0.0689651	0.0400774	3q22.1	3
RBX1	41	148	-0.456034	0.044354	-0.500388	0.000263039	0.0400774	22q13.2	22	NF2
SENP3-EIF4A1	63	126	-0.339304	0.0862915	-0.425595	0.000710578	0.0400774	17p13.1	17	TP53
PSMD11	20	169	-1.22787	0.00626053	-1.23413	0.00127472	0.0410602	17q11.2	17	NF1, BRCA1
POLR2J3	19	154	-0.648676	0.0293669	-0.678043	0.000725401	0.0410602	7q22.1	7	MLL3
ELP4	23	166	-0.329311	0.109626	-0.438937	0.00479597	0.0416616	11p13	11
ERLIN1	29	160	-0.263519	0.108092	-0.371611	0.000860951	0.0432672	10q24.31	10	PTEN
ZNF624	48	141	-0.146734	0.0492702	-0.196004	0.0014212	0.0432672	17p11.2	17	TP53
DNAJA3	17	172	-0.608761	-0.033685	-0.575076	0.00860019	0.0434833	16p13.3	16
RPS10-NUDT3	15	174	-0.680347	0.0742561	-0.754603	0.000858741	0.0464679	6p21.31	6
AURKB	59	130	-0.405478	0.187273	-0.592751	2.69384e-06	0.0464679	17p13.1	17	TP53
EEF1E1	23	166	-0.308522	-0.0134581	-0.295064	0.00855783	0.0464679	6p24.3	6
RAPSN	13	176	-0.371688	-0.0192801	-0.352408	0.00111515	0.0466566	11p11.2	11
NUP98	37	152	-0.39862	0.0328382	-0.431458	0.00021857	0.0477171	11p15.4	11
ZNF791	20	169	-0.522487	0.0367231	-0.55921	0.00240526	0.0493757	19p13.2	19	STK11
UBE2I	22	167	-0.397755	0.102721	-0.500476	0.00587516	0.0497326	16p13.3	16
CWC22	9	180	-1.11429	0.0548203	-1.16911	0.0160083	0.0501084	2q31.3	2	IKZF2
CCNK	35	154	-0.208248	0.105617	-0.313865	0.0101025	0.0501084	14q32.2	14
USP5	19	170	-0.664882	0.0123337	-0.677215	0.00695771	0.052013	12p13.31	12	CDKN1B
BCL2L2-PABPN1	37	152	-0.365351	0.0649129	-0.430264	0.000661747	0.0525533	14q11.2	14
PSMD2	6	183	-1.31468	-0.00167118	-1.31301	0.0410413	0.053539	3q27.1	3
PSMB3	19	170	-0.850833	0.0500196	-0.900852	0.00087004	0.053539	17q12	17	NF1, BRCA1
GTF3A	48	141	-0.422861	0.0895573	-0.512419	1.12379e-05	0.053539	13q12.2	13	RB1
ZNF782	16	173	-0.345594	0.00875717	-0.354351	0.00417851	0.053539	9q22.33	9
PSMB7	15	174	-0.770581	-0.0213829	-0.749198	0.00441237	0.0560833	9q33.3	9
RANBP1	26	163	-0.37606	0.069211	-0.445271	0.00199159	0.0560833	22q11.21	22	NF2
VCP	34	155	-0.470398	0.0500664	-0.520465	0.00444447	0.0571971	9p13.3	9	CDKN2A, CDKN2B
BUD31	17	172	-0.647793	0.0147653	-0.662559	0.000979718	0.0582485	7q22.1	7	MLL3
XRCC6	35	154	-0.465895	0.0812093	-0.547104	0.00271218	0.0591138	22q13.2	22	NF2
RPS15	38	151	-0.694749	0.0799758	-0.774724	4.27934e-06	0.062544	19p13.3	19	STK11
NAT10	18	171	-0.466637	0.0562201	-0.522857	0.00104681	0.0656289	11p13	11
SLC39A12	53	136	-0.159743	0.0861156	-0.245858	0.000755403	0.0663929	10p12.33	10
CTRB1	26	163	-0.326562	0.0247467	-0.351309	0.000362172	0.0678235	16q23.1	16
RRN3	17	172	-0.35726	-0.0576064	-0.299654	0.0485254	0.0678235	16p13.12	16
PIP5K1B	27	162	-0.232301	0.0150225	-0.247324	0.015187	0.0678235	9q21.11	9
CHD4	19	170	-0.745323	-0.0324953	-0.712828	0.0158973	0.0680604	12p13.31	12	CDKN1B
RPS25	32	157	-0.539503	0.0567578	-0.59626	0.00130661	0.0711406	11q23.3	11	ATM
POLR2C	19	170	-0.443328	0.152527	-0.595854	0.00399747	0.0723948	16q21	16
SF3A2	36	153	-0.681494	0.0634356	-0.744929	2.58437e-06	0.0730385	19p13.3	19	STK11
RFC2	19	170	-0.546797	0.031712	-0.578509	0.0012665	0.0745728	7q11.23	7	MLL3
TCP1	39	150	-0.412546	0.0186117	-0.431158	0.00199078	0.0745728	6q25.3	6	PARK2
RANGAP1	36	153	-0.34785	0.0623801	-0.41023	0.00450936	0.0826333	22q13.2	22	NF2
MDH1B	17	172	-0.216984	0.0242803	-0.241264	0.0184086	0.0865859	2q33.3	2	IKZF2
ADSL	40	149	-0.704231	-0.0575126	-0.646719	0.00063971	0.0874043	22q13.1	22	NF2
FKBP1A-SDCBP2	16	173	-0.366483	0.0246477	-0.391131	0.0124033	0.0874043	20p13	20
MAD2L1	39	150	-0.555809	0.0114114	-0.567221	0.00117115	0.0904461	4q27	4	FAT1
SMC1A	23	166	-0.790181	0.0959149	-0.886096	0.000629653	0.091769	Xp11.22	23
CD4	19	170	-0.189608	0.0515821	-0.24119	0.00535206	0.0926077	12p13.31	12	CDKN1B
DHX15	41	148	-0.315618	0.0880373	-0.403656	5.36511e-05	0.0927022	4p15.2	4
GPS1	9	180	-1.31638	-0.0428836	-1.2735	0.0249168	0.0930084	17q25.3	17	NF1, BRCA1
LOXL3	6	183	-0.410705	0.0189174	-0.429622	0.0169147	0.0946692	2p13.1	2
PIWIL2	64	125	-0.215158	-0.00271099	-0.212447	0.00329323	0.0946692	8p21.3	8
EIF4A3	9	180	-0.987277	-0.0252821	-0.961995	0.0407081	0.097496	17q25.3	17	NF1, BRCA1
PPP2R1A	10	179	-0.685645	-0.0287401	-0.656905	0.00624916	0.097496	19q13.41	19
U2AF1	27	162	-0.57601	-0.0659374	-0.510073	0.000237522	0.097496	21q22.3	21
SRRM1	31	158	-0.356101	0.129738	-0.48584	0.000228683	0.097496	1p36.11	1	ARID1A
RFC4	8	181	-0.812313	-0.00639222	-0.805921	0.0455641	0.0987563	3q27	3
MED15	25	164	-0.251548	0.0376032	-0.289152	0.000612251	0.0987563	22q11.21	22	NF2
INPP5D	26	163	-0.222527	0.0572265	-0.279753	0.0127612	0.0987563	2q37.1	2	IKZF2
SMARCB1	29	160	-0.375628	-0.00317644	-0.372452	0.0369496	0.0994909	22q11.23	22	NF2
PSMA4	16	173	-1.00707	-0.00933911	-0.997726	0.00031726	0.10549
RPA3	15	174	-0.569755	0.0958603	-0.665616	0.0128495	0.10549
DCTN1	6	183	-0.628999	0.00049237	-0.629491	0.104408	0.10549
QARS	44	145	-0.44359	0.0819316	-0.525521	0.000154851	0.10549
ABT1	18	171	-0.384078	-0.0350031	-0.349075	0.0113438	0.106837
EEF2	39	150	-0.792636	0.197113	-0.989749	1.69274e-07	0.108304
SNRPD3	31	158	-0.579549	0.0799809	-0.659529	0.00121115	0.108304
RPS15A	18	171	-0.49853	0.0130263	-0.511556	0.0106355	0.108304
TRAPPC8	49	140	-0.48506	0.000916826	-0.485977	0.00108356	0.108304
SDCBP2	16	172	-0.366483	0.0217241	-0.388207	0.01289	0.108304
SOHLH2	47	142	-0.105026	0.0929135	-0.197939	0.00848934	0.108548
MCM7	16	173	-0.92586	0.0458779	-0.971738	0.000809197	0.109027
CHD4	19	170	-0.695913	-0.00502774	-0.690885	0.0328976	0.115095
TNFSF12-TNFSF13	63	126	-0.131184	0.0588608	-0.190045	0.00229876	0.115267
RPS9	9	180	-1.16291	-0.101855	-1.06106	0.0246499	0.11766
PSMA2	12	177	-0.78446	-0.0114976	-0.772963	0.0041425	0.11766
RPS12	31	158	-0.278618	0.0151257	-0.293743	0.0228873	0.11766
NRGN	33	156	-0.220385	0.0704465	-0.290831	0.00239979	0.11766
TEAD4	19	170	-0.30669	0.0180497	-0.324739	0.0124777	0.118124
PHB2	18	171	-0.714308	-0.0637816	-0.650527	0.0359593	0.120916
NUPL1	49	140	-0.400895	0.105737	-0.506632	0.000599288	0.120916
TSC2	18	171	-0.316695	0.0183049	-0.335	0.00591682	0.121239
GTPBP4	58	131	-0.251505	0.139746	-0.391251	0.00424177	0.122521
PFN1	58	131	-0.31785	0.0684511	-0.386301	0.000139424	0.12496
WDR18	37	152	-0.369246	0.098176	-0.467422	0.00404536	0.126576
CTRB2	27	162	-0.300367	0.0225494	-0.322916	0.000875758	0.126576
XRCC5	17	172	-0.229152	0.0102465	-0.239398	0.0958389	0.126984
PACSIN1	15	174	-0.360078	0.11133	-0.471408	0.00383793	0.128136
RIOK1	23	166	-0.321165	0.0710972	-0.392262	0.00122467	0.128136
CTDSPL	61	128	-0.141165	0.104434	-0.245599	0.000788756	0.128136
NUTF2	24	165	-0.582935	-0.0328048	-0.55013	0.00316953	0.128142
TBL3	19	170	-0.319349	0.0792953	-0.398645	0.0237489	0.128142
ARCN1	32	157	-0.375877	0.0668037	-0.442681	3.98452e-05	0.129588
RPA2	34	155	-0.593172	0.0246502	-0.617822	0.000355055	0.131097
U2AF2	10	179	-0.79355	-0.0213743	-0.772176	0.0460093	0.13158
URM1	12	177	-0.475808	0.0923384	-0.568147	0.00267976	0.133191
TACC3	45	144	-0.399619	0.0789875	-0.478607	0.00136431	0.136257
CPB2	49	140	-0.0839308	0.0792222	-0.163153	0.00679495	0.140221
PDAP1	17	172	-0.382266	0.00893659	-0.391203	0.00374166	0.140302
PRODH2	8	181	-0.698332	0.0224775	-0.72081	0.0059625	0.142283
ZNF426	28	161	-0.175174	0.0311162	-0.20629	0.0061576	0.142283
PRPF31	9	180	-0.735275	0.0124703	-0.747745	0.00253043	0.143409
BAZ2A	10	179	-0.39155	0.114163	-0.505712	0.00352592	0.143409
KDM1A	31	158	-0.353711	0.0742186	-0.42793	0.0178481	0.143409
POLR2J2	44	145	-0.365092	-0.021434	-0.343658	0.00582416	0.143409
EYA4	33	156	-0.2119	0.0671441	-0.279044	0.00300365	0.143409
HIST1H2BM	18	171	-0.222631	0.0533913	-0.276022	0.0138339	0.143409
HIF3A	19	170	-0.181706	0.0796258	-0.261331	0.00355471	0.143409
DBH	11	178	-0.492064	0.085862	-0.577926	5.67772e-05	0.143414
NANOGNB	18	171	-0.343518	0.0282817	-0.371799	0.0130574	0.143414
DYNC1H1	36	153	-0.129205	-0.00485483	-0.12435	0.114615	0.144681
EIF2B5	6	183	-1.22669	-0.00204611	-1.22465	0.0302539	0.146042
CIB4	5	184	-0.824853	0.00612574	-0.830979	0.0141432	0.146042
MED28	40	149	-0.380018	0.138776	-0.518795	0.000295568	0.146042
GAK	44	145	-0.216106	0.0705674	-0.286674	0.0230484	0.146042
POLR2E	37	151	-0.523168	0.0766159	-0.599784	2.53946e-05	0.148575
HSPD1	11	178	-0.597504	0.00246947	-0.599974	0.0185099	0.149982
SEC61G	12	177	-0.430618	0.0555232	-0.486141	0.0256806	0.149982
ARPC4	24	165	-0.422065	0.0433163	-0.465381	0.0012224	0.149982
PRSS33	17	172	-0.229193	0.0102758	-0.239469	0.0296851	0.149982
GPR115	18	171	-0.302615	0.117369	-0.419984	0.000279298	0.15014
CPA2	19	170	-0.250377	0.0215489	-0.271926	0.0034966	0.15036
TBRG1	32	157	-0.115713	0.027632	-0.143345	0.0211162	0.154061
PRPF4	16	173	-0.55727	-0.0111004	-0.546169	0.0359081	0.154943
TSG101	28	161	-0.658117	0.0145982	-0.672715	0.00571807	0.161592
ATP6V0C	18	171	-0.51096	-0.0102789	-0.500681	0.0143027	0.161592
NUP205	19	170	-0.741364	-0.0482326	-0.693131	0.00380299	0.162683
ACO2	36	153	-0.382664	0.0654791	-0.448143	0.00464053	0.162683
RNF186	29	160	-0.254151	0.0529804	-0.307131	0.000455971	0.162683
CCT6A	11	178	-0.279931	0.00817226	-0.288103	0.0164656	0.162683
YY1	35	154	-0.213279	0.0698472	-0.283126	0.00481908	0.163435
MOGAT3	17	172	-0.466787	0.0141316	-0.480919	0.00568145	0.165673
MET	21	168	-0.155727	0.0404986	-0.196225	0.0446479	0.165673
SLC38A4	15	174	-0.372443	0.0340525	-0.406496	9.60704e-06	0.167594
URM1	12	177	-0.272808	0.0440566	-0.316864	0.023034	0.172979
EIF2B2	31	158	-0.172702	-0.0346449	-0.138057	0.191014	0.172979
FOXC1	29	159	-0.200307	0.0183728	-0.218679	0.0125823	0.173894
AACS	16	173	-0.388347	0.0127817	-0.401129	0.00721892	0.174989
EIF5A	61	128	-0.361812	0.134522	-0.496334	0.000524791	0.17776
NOTCH1	14	175	-0.259637	0.0160164	-0.275654	0.0182786	0.180167
SCD	29	160	-0.257607	-0.0120758	-0.245531	0.0501511	0.182842
CWC15	24	165	-0.117055	0.102063	-0.219118	0.0763176	0.183478
CD109	21	168	-0.463958	0.131135	-0.595093	0.00140936	0.183764
POLR2H	6	183	-0.545819	0.0269016	-0.572721	0.0425725	0.183764
SF3B3	23	166	-0.62404	-0.0208153	-0.603225	0.00203818	0.186658
PAK1IP1	23	166	-0.503271	0.0830923	-0.586364	0.00115517	0.18885
EXOC2	29	160	-0.259763	0.0150121	-0.274775	0.00750696	0.189994
ZNF747	18	170	-0.259939	-0.0253295	-0.234609	0.0135947	0.190507
CKS2	23	166	-0.218762	0.0427636	-0.261525	0.00919309	0.191323
TGFBRAP1	9	180	-0.367698	-0.012473	-0.355225	0.0338879	0.191775
HNRNPH1	12	177	-0.416879	0.00519888	-0.422078	0.0021839	0.193532
UBA52	22	167	-0.319694	0.0628065	-0.3825	0.000277554	0.193532
NAMPT	21	168	-0.433651	-0.0527987	-0.380852	0.0290518	0.193532
ELP3	64	125	-0.15373	0.0707337	-0.224464	0.00239987	0.193532
NDN	21	168	-0.236139	-0.00242972	-0.23371	0.00659685	0.195078
USPL1	49	140	-0.300133	0.0588367	-0.35897	0.00484748	0.196462
ATP11A	43	146	-0.177959	0.0524959	-0.230455	0.0021965	0.196724
GGPS1	6	183	-0.546074	0.0236358	-0.56971	0.0834416	0.197315
CDC5L	15	174	-0.541399	-0.0575581	-0.483841	0.00450925	0.20119
RPE65	12	177	-0.359231	0.00795081	-0.367181	0.00534386	0.20119
PIAS2	67	122	-0.102608	0.037647	-0.140255	0.00310272	0.204606
PDIK1L	34	155	-0.138242	-0.00431679	-0.133925	0.0639435	0.210371
SNRNP27	6	183	-0.757043	-0.0824626	-0.67458	0.135002	0.213938
RRM2	10	179	-0.630197	0.0113206	-0.641517	0.0555506	0.213938
RIMS4	5	184	-0.313206	0.03347	-0.346676	0.0756413	0.213938
CARS	36	153	-0.322303	-0.0293408	-0.292962	0.0109496	0.213938
RHOT2	19	170	-0.29197	0.000362986	-0.292333	0.0200303	0.213938
HIRA	28	161	-0.236418	0.0235539	-0.259972	0.0172013	0.213938
EMP2	17	172	-0.172432	0.050607	-0.223039	0.0124932	0.213938
FARS2	29	160	-0.193106	0.00887518	-0.201981	0.0253351	0.213938
ZFP37	16	173	-0.475735	-0.0115974	-0.464138	0.0224967	0.219377
ZNF524	11	178	-0.360757	0.0471168	-0.407874	0.00745466	0.221253
P2RX1	57	132	-0.157713	0.0176855	-0.175398	0.0164416	0.224061
SNRPE	6	183	-1.42437	0.000839077	-1.42521	0.0685084	0.224587
HAL	14	174	-0.277951	0.0361584	-0.314109	0.0048004	0.224681
PSMD12	8	181	-1.02594	-0.0255405	-1.0004	0.0191717	0.229642
SF3B14	8	181	-0.866625	-0.052845	-0.81378	0.00989951	0.229642
OIP5	21	168	-0.516445	0.030746	-0.547191	0.000679186	0.231434
SNRPD1	28	161	-0.283916	0.172798	-0.456714	0.0105769	0.231434
TWISTNB	15	174	-0.394336	-0.00482349	-0.389512	0.0816258	0.231434
ZNF317	30	159	-0.175391	0.063134	-0.238525	0.000904539	0.231434
EXOSC9	38	151	-0.250233	-0.0298607	-0.220372	0.024708	0.231434
CCT5	5	184	-1.01419	0.00200639	-1.01619	0.0624472	0.234154
NAPA	20	169	-0.566819	-0.0300416	-0.536777	0.0216809	0.234154
SUPT6H	18	171	-0.472756	0.0248063	-0.497562	0.0141964	0.234154
TBC1D9B	11	178	-0.367576	0.0326371	-0.400213	0.0565391	0.234154
DHX38	26	163	-0.316119	0.0353199	-0.351439	0.0098272	0.234154
ROR2	18	171	-0.271959	0.0176939	-0.289652	0.0251201	0.234154
COL1A2	14	175	-0.214169	0.0502668	-0.264436	0.0213933	0.234154
BRCA2	49	140	-0.256645	-0.0223056	-0.234339	0.00764849	0.234154
IPMK	25	164	-0.208383	0.00506029	-0.213443	0.0116423	0.234154
IL2RB	39	150	-0.15606	0.032695	-0.188755	0.00188117	0.234154
BPGM	18	171	-0.146479	0.031547	-0.178026	0.0421154	0.234154
SNRPF	14	174	-0.818125	-0.12268	-0.695445	0.0202817	0.237264
LONP1	38	151	-0.346964	0.0881126	-0.435077	0.00111477	0.237264
DDX6	32	157	-0.209515	0.0187936	-0.228308	0.0225303	0.23797
OVOL2	18	171	-0.27891	0.0365125	-0.315423	0.00215898	0.239795
IARS	18	171	-0.329733	-0.0208362	-0.308896	0.00870944	0.240733
RARS	13	176	-0.429966	0.0312047	-0.461171	0.00425844	0.241533
GRAP	51	135	-0.162054	0.0418017	-0.203856	0.00179821	0.241533
THOC5	33	156	-0.454792	0.0368546	-0.491646	0.00242886	0.244316
DHX40	7	182	-0.487985	-0.0292084	-0.458776	0.00316456	0.244316
SRSF7	5	184	-0.718336	-0.0260357	-0.6923	0.0942393	0.244919
FXYD7	7	182	-0.434104	-0.0122058	-0.421898	0.0262814	0.244919
NAPSA	15	174	-0.206341	0.0787865	-0.285127	0.00393904	0.244919
GCFC1	27	162	-0.506063	0.094442	-0.600505	3.42014e-05	0.245298
ADRBK1	6	183	-0.371697	-0.0178762	-0.353821	0.0530856	0.245298
POLR1A	6	183	-0.812234	0.0294841	-0.841718	0.0612203	0.249843
PTPN7	6	183	-0.602329	0.00181171	-0.604141	0.000928326	0.249843
POLR2F	39	150	-0.501646	0.0534103	-0.555056	0.00106879	0.249843
NFRKB	33	156	-0.19769	0.0874296	-0.285119	0.0253482	0.249843
GDF3	18	171	-0.258378	0.012405	-0.270783	0.0148596	0.249843
LSM7	37	152	-0.48043	0.0590528	-0.539483	2.65542e-05	0.250811
MDFI	17	172	-0.257895	0.0375478	-0.295442	0.0185799	0.250811
NEIL3	55	134	-0.173561	0.0875557	-0.261117	0.0039825	0.25273
NUP85	5	184	-1.1211	0.0163342	-1.13743	0.071167	0.259711
AKTIP	18	171	-0.183374	0.0226551	-0.206029	0.0168689	0.261358
CHP2	18	171	-0.198526	0.0284146	-0.226941	0.0106038	0.262806
DHDDS	36	153	-0.233273	0.080625	-0.313898	0.00517667	0.262872
MAN2A1	19	170	-0.334941	-0.0300766	-0.304864	0.0128798	0.262872
RBM39	2	187	-1.527	-0.045689	-1.48131	0.211451	0.263235
COPS5	17	172	-0.802652	0.0281407	-0.830793	0.00785108	0.263235
ARF4	46	143	-0.436476	-0.034571	-0.401905	0.0105834	0.263235
ELAVL1	34	155	-0.278462	0.0820216	-0.360484	4.28815e-05	0.263235
CRELD2	44	145	-0.167402	0.0305655	-0.197968	0.00288971	0.263235
UGT1A5	22	167	-0.130757	0.0415143	-0.172271	0.0337439	0.263235
KLHL4	6	183	-0.461755	0.0680467	-0.529802	0.00453837	0.26366
ASH2L	48	141	-0.312093	0.0388397	-0.350933	0.00138585	0.26366
ACIN1	37	152	-0.273567	0.0723219	-0.345889	0.0124483	0.26629
MPP2	17	172	-0.379145	0.0614361	-0.440581	0.000150316	0.271908
HIST1H1B	18	171	-0.21417	0.0536342	-0.267804	0.0244439	0.272482
ZFPM1	31	158	-0.226319	0.0272829	-0.253602	0.00425205	0.272482
SKA1	72	117	-0.131918	0.0550026	-0.186921	0.000502755	0.272647
TRRAP	18	171	-0.638068	-0.0204605	-0.617607	0.0141141	0.272957
PPP6C	13	176	-0.39761	0.1442	-0.54181	0.00824051	0.272957
PRMT1	15	174	-0.443908	-0.0218351	-0.422073	0.00481039	0.272957
MRRF	14	175	-0.343691	0.0496791	-0.39337	0.0185377	0.272957
CTR9	32	157	-0.368442	-0.0145671	-0.353875	0.003486	0.272957
GNL3	45	144	-0.17724	0.00536335	-0.182603	0.00845483	0.272957
SP7	12	177	-0.337321	-0.0189017	-0.318419	0.0164263	0.27345
FBXW11	10	179	-0.72034	0.0452236	-0.765563	0.0218829	0.273954
CLEC12A	20	169	-0.374935	-0.000450631	-0.374485	0.0157409	0.277539
HARS	12	177	-0.248297	0.0352425	-0.28354	0.0239275	0.277539
ZNF160	10	179	-0.193426	0.0764763	-0.269902	0.027182	0.277539
WARS	34	155	-0.119041	-0.00222815	-0.116813	0.160353	0.277539
NUCB1	18	171	-0.308606	0.0467898	-0.355396	0.0289953	0.27782
STRAP	18	171	-0.333096	0.0147622	-0.347858	0.0457278	0.27782
ATP6V0D1	23	166	-0.205079	0.100322	-0.305402	0.0152866	0.27782
RHEB	16	173	-0.270154	-0.0153605	-0.254794	0.0426632	0.27782
RXFP1	46	143	-0.177295	0.0356286	-0.212924	0.00635208	0.27782
GLUD1	27	162	-0.145748	0.0269025	-0.17265	0.031749	0.27782
PHF11	46	143	-0.140642	0.0402123	-0.180855	0.011332	0.280872
P2RX6	25	164	-0.42633	0.0387216	-0.465052	0.00547032	0.282142
SV2B	15	174	-0.33993	0.0348819	-0.374812	0.000517286	0.28281
CD79B	9	180	-0.271826	0.193088	-0.464914	0.00451751	0.292338
SERF2-C15ORF63	20	169	-0.334058	0.0183806	-0.352438	0.00201577	0.292338
CD34	8	181	-0.280222	0.0164675	-0.29669	0.0363468	0.292338
C14orf166	31	158	-0.186751	0.0503901	-0.237141	0.00950107	0.292338
SERPINA9	35	154	-0.137638	0.0719438	-0.209582	0.00879515	0.292338
SET	12	177	-0.621032	0.0303928	-0.651425	0.0444831	0.292578
C15orf63	20	169	-0.334058	0.0183806	-0.352438	0.00201577	0.292578
PSMD13	33	156	-0.157034	0.15013	-0.307165	0.0164081	0.292707
ATP5A1	66	123	-0.261719	0.026138	-0.287857	0.00111364	0.296687
HNRPDL	41	148	-0.154049	0.13018	-0.284229	0.000737333	0.297201
RGS4	3	186	-0.790716	0.0449618	-0.835678	0.0518683	0.297541
MBOAT7	9	180	-0.203552	0.114948	-0.318499	0.11864	0.297541
SMARCAD1	42	147	-0.170441	0.0400034	-0.210445	0.00349949	0.302487
GJA4	15	174	-0.237084	-0.00228199	-0.234802	0.0549254	0.303444
OR2G3	6	183	-0.707333	0.106425	-0.813758	0.0437158	0.304647
DNAJB8	10	179	-0.288642	-0.0119386	-0.276703	0.0282629	0.304647
OSCAR	8	181	-0.828515	-0.0122004	-0.816315	0.00955742	0.310341
LEO1	19	170	-0.307327	0.0977212	-0.405048	0.0442532	0.310484
KDM1B	20	169	-0.207249	0.0651759	-0.272425	0.00511998	0.310484
PARG	27	162	-0.298838	-0.0493161	-0.249521	0.067093	0.312786
SLC6A10P	51	134	-0.0818373	0.00128863	-0.0831259	0.156369	0.314316
DUOX1	19	170	-0.13456	0.115586	-0.250145	0.0331508	0.315043
UQCRH	8	181	-0.252754	0.0567539	-0.309508	0.0012357	0.320883
TNS1	16	173	-0.187591	0.0201341	-0.207725	0.0752824	0.322047
DCLRE1B	17	172	-0.118324	0.0524053	-0.17073	0.128197	0.322047
TRIP13	10	179	-0.571165	-0.0609111	-0.510254	0.012901	0.323652
CHST14	20	169	-0.279998	0.00349337	-0.283491	0.056933	0.323652
MKRN1	16	173	-0.174258	0.0236296	-0.197888	0.0898312	0.323652
SRP9	6	183	-0.495145	0.021921	-0.517066	0.0923948	0.325304
ZNF483	14	175	-0.446808	-0.0438073	-0.403001	0.0463635	0.325304
PRPF4B	26	163	-0.340557	0.0088105	-0.349367	0.000976965	0.325304
SCNN1B	18	171	-0.312166	0.0297282	-0.341894	0.00611241	0.325304
IL11	11	178	-0.297794	-0.0272473	-0.270547	0.0641866	0.325304
HESX1	46	143	-0.0701013	0.0303557	-0.100457	0.099262	0.325304
CAMK2A	9	180	-0.454408	0.0459944	-0.500402	0.0148475	0.326223
FXR2	63	126	-0.113019	0.050388	-0.163407	0.00696285	0.326223
DCP1B	18	171	-0.20654	0.0447503	-0.25129	0.0331167	0.329517
AMFR	19	170	-0.20672	0.0342686	-0.240988	0.0711435	0.331453
EEF1D	12	177	-0.326493	0.0648793	-0.391373	0.0387341	0.33294
EFTUD2	16	173	-1.14719	-0.00457301	-1.14261	0.00151059	0.333361
AP2M1	6	183	-0.766061	0.0282014	-0.794263	0.0543942	0.333361
LSM3	28	161	-0.589951	0.0520313	-0.641982	0.00145451	0.333361
PNO1	7	182	-0.589758	-0.0652593	-0.524498	0.182319	0.333361
SGOL2	14	175	-0.338424	0.0035776	-0.342002	0.0153097	0.333361
TMUB2	18	171	-0.145583	0.101471	-0.247054	0.0763044	0.333361
CYCS	15	174	-0.175067	0.0315869	-0.206654	0.0317623	0.333361
SRP68	7	182	-0.473896	0.0326815	-0.506577	0.103414	0.333443
THOC7	44	145	-0.29582	0.0145064	-0.310326	0.00378015	0.339132
OAT	36	153	-0.142221	0.013148	-0.155369	0.00633551	0.340286
SLC12A8	11	178	-0.272717	0.00779251	-0.280509	0.0237194	0.340407
LPPR4	19	170	-0.306392	0.0395284	-0.345921	0.0172305	0.340534
MED1	19	170	-0.6825	-0.0433575	-0.639142	0.0392379	0.342258
CELF4	62	127	-0.252761	0.12226	-0.375021	2.72915e-05	0.342938
BUB3	36	153	-0.240342	0.0302561	-0.270598	0.0262484	0.347454
ACLY	18	171	-0.714895	0.0660521	-0.780947	0.0156185	0.349114
BLM	15	174	-0.318002	0.0695609	-0.387563	0.0127436	0.349114
DRG2	46	143	-0.065512	0.0271256	-0.0926377	0.0690596	0.349114
VPS16	19	170	-0.277519	-0.0188915	-0.258627	0.0536439	0.351012
NUP214	14	175	-0.631459	-0.0201465	-0.611313	0.0509103	0.3512
SDHA	11	178	-0.291411	0.0231782	-0.31459	0.100018	0.3512
DDX19B	22	167	-0.278835	-0.00223335	-0.276601	0.0255431	0.3512
CKS2	23	166	-0.199147	0.0508347	-0.249982	0.105128	0.3512
ACRBP	19	170	-0.165237	0.046898	-0.212135	0.0254261	0.3512
PPP1R14C	38	151	-0.132307	0.0227998	-0.155106	0.00543964	0.3512
CD163	18	171	-0.365341	0.0179064	-0.383247	0.0282422	0.352026
KDSR	78	111	-0.102118	-0.0212642	-0.0808533	0.124335	0.352865
FBXL6	12	177	-0.280562	0.0799544	-0.360517	0.029671	0.357913
EIF4G1	6	183	-0.752759	0.00225452	-0.755013	0.0274669	0.358795
MRPL12	9	180	-0.479561	0.0843204	-0.563881	0.0394782	0.358795
KIR2DS2	29	154	-0.0740227	0.0452429	-0.119266	0.070196	0.358795
CAPZB	28	161	-0.513817	-0.0115636	-0.502253	0.00533123	0.36034
GAPDH	18	171	-0.399905	0.0296778	-0.429583	0.019289	0.36066
CPSF4	17	172	-0.293036	0.0762992	-0.369336	0.0320947	0.360987
ADAT3	35	154	-0.259123	0.0646002	-0.323723	2.21778e-05	0.36132
MYL12A	29	160	-0.441337	0.0213997	-0.462736	0.0556182	0.368474
MYBBP1A	56	133	-0.287996	0.0994106	-0.387407	0.00128603	0.368474
CD1A	2	187	-0.535881	0.0522668	-0.588148	0.106969	0.370185
EIF3G	22	167	-0.653759	-0.0257789	-0.62798	0.000917925	0.370854
LSM4	22	167	-0.532345	0.0702295	-0.602574	7.92632e-05	0.370854
PMPCA	9	180	-0.41341	0.0114222	-0.424832	0.100985	0.370854
RBM22	9	180	-0.357441	0.01557	-0.373011	0.00670451	0.370854
SLC35A5	11	178	-0.331305	0.037163	-0.368468	0.0231365	0.370854
ZNF738	22	167	-0.36418	-0.0265119	-0.337669	0.002306	0.370854
MYL12B	29	160	-0.311353	0.0186557	-0.330008	0.0690326	0.370854
CIB3	21	168	-0.266951	0.054305	-0.321256	0.0100247	0.370854
ZNF862	15	174	-0.302454	-0.0031596	-0.299295	0.0280039	0.370854
TTL	9	180	-0.222504	-0.00154216	-0.220962	0.128315	0.370854
OR52I2	38	151	-0.0181828	0.180018	-0.198201	0.0410043	0.370854
ATG12	19	170	-0.132292	0.0598537	-0.192146	0.056884	0.370854
ERAL1	17	172	-0.157656	0.0253848	-0.183041	0.0176579	0.370854
RCN2	17	172	-0.13047	0.051959	-0.182429	0.104293	0.370854
PIAS4	38	151	-0.151843	0.0274623	-0.179305	0.00815108	0.371335
CBX7	38	151	-0.162924	0.0476337	-0.210558	0.0117066	0.375351
RNF40	16	173	-0.322875	0.0164005	-0.339275	0.0279438	0.378753
PIR	24	164	-0.0806187	0.0320754	-0.112694	0.135287	0.379292
PRSS35	30	159	-0.187618	-0.0196934	-0.167925	0.0297008	0.380575
SLC7A2	64	125	-0.161502	0.0593906	-0.220893	0.00920076	0.382624
FNTA	38	151	-0.23548	0.101109	-0.33659	0.0189244	0.385144
GDPD5	15	174	-0.261267	0.0564046	-0.317672	0.0327053	0.385144
POU2AF1	31	158	-0.185572	0.00615927	-0.191731	0.0119757	0.385144
COPS6	16	173	-0.548081	0.0325964	-0.580678	0.00593201	0.386997
CASP8AP2	29	160	-0.592539	-0.0523842	-0.540155	0.00406311	0.386997
MMP27	24	165	-0.165059	0.0445305	-0.209589	0.0146262	0.386997
MBD1	72	117	-0.127176	0.137043	-0.264219	0.000823406	0.389988
NUDT5	56	133	-0.133228	0.0344234	-0.167651	0.0488034	0.391443
HGS	9	180	-0.508098	0.0534402	-0.561538	0.0233152	0.393727
PIP5KL1	12	177	-0.361997	-0.018975	-0.343022	0.0316325	0.394421
CHRNA5	16	173	-0.309732	0.0933854	-0.403117	0.000613494	0.395017
HSD11B2	23	166	-0.154686	-0.03052	-0.124166	0.10218	0.395017
POM121	18	171	-0.408885	-0.0260452	-0.38284	0.0376401	0.396562
MED30	5	184	-0.65408	0.0790224	-0.733102	0.0432158	0.397205
CHTF18	20	169	-0.244493	0.15024	-0.394734	0.0148399	0.397205
DDX21	22	167	-0.445327	0.088744	-0.534071	0.0239434	0.3985
DARS	13	176	-0.420015	0.0157978	-0.435812	0.0206599	0.3985
TNNC2	5	184	-0.264464	-0.0113383	-0.253125	0.134194	0.3985
PRB1	18	152	-0.189952	0.0500431	-0.239995	0.0473465	0.3985
ATP5D	38	151	-0.213503	0.00826757	-0.221771	0.00877994	0.3985
FPR2	11	178	-0.52526	-0.0337491	-0.49151	0.0333547	0.401722
UBA1	20	169	-0.471466	-0.000850687	-0.470615	0.00260254	0.401722
CERS5	14	175	-0.167142	0.0312326	-0.198375	0.0831455	0.401722
MAP3K5	33	156	-0.126983	0.00893674	-0.13592	0.0626096	0.401722
SHOX2	3	186	-0.513535	0.0184413	-0.531976	0.136507	0.402519
PPWD1	24	165	-0.463562	0.0250478	-0.488609	0.00130807	0.402519
GPX4	38	151	-0.298765	0.00885227	-0.307618	0.00613977	0.406041
TNRC6C	9	180	-0.396743	-0.0716264	-0.325117	0.0401108	0.407825
PSMD7	26	163	-0.511693	0.00931413	-0.521008	0.0179898	0.411479
UFM1	48	141	-0.171534	0.0576768	-0.229211	0.012415	0.411479
RPS11	17	172	-0.78524	-0.0649118	-0.720328	0.0233188	0.412424
ARG2	32	157	-0.092474	0.017895	-0.110369	0.095003	0.412424
HIST1H3H	18	171	-0.127492	0.0502143	-0.177706	0.0366097	0.412439
HTR2B	20	169	-0.266173	0.110698	-0.376871	0.00568523	0.416251
ATP2A2	18	171	-0.412192	0.0461597	-0.458351	0.0286204	0.41918
RPS10	15	174	-0.497812	-0.000213865	-0.497598	0.0253798	0.421182
INPP5J	34	155	-0.0166656	0.066189	-0.0828546	0.179469	0.422224
DEF6	15	174	-0.160633	0.0364916	-0.197125	0.00614516	0.422283
PRPF3	2	187	-0.650691	-0.056664	-0.594027	0.0267768	0.422346
MEIS1	7	182	-0.660175	0.13623	-0.796406	0.0216209	0.422414
NARS	75	114	-0.200038	0.0386033	-0.238641	0.00155448	0.422487
CAB39	20	169	-0.295645	0.0225972	-0.318242	0.0216838	0.422564
BST1	40	149	-0.296522	0.00490923	-0.301431	0.00289154	0.424667
CENPA	5	184	-0.669307	-0.0544933	-0.614813	0.00805753	0.42545
GPR182	10	179	-0.592888	-0.000447143	-0.59244	0.0618334	0.42545
HSPE1	11	178	-0.655293	-0.0651667	-0.590126	0.0429888	0.42545
GTF3C2	5	184	-0.381782	0.0439114	-0.425693	0.0337869	0.42545
CDC40	33	156	-0.367596	0.0136367	-0.381233	0.0273101	0.42545
GALNTL5	18	171	-0.204904	0.142039	-0.346943	0.0675325	0.42545
IK	12	177	-0.36626	-0.0403161	-0.325944	0.0796146	0.42545
DNAJC7	19	170	-0.234879	0.0319097	-0.266789	0.0301184	0.42545
HTATSF1	5	184	-0.25916	-0.00982133	-0.249339	0.262606	0.42545
ARPC4-TTLL3	24	165	-0.239543	0.00238223	-0.241926	0.00836604	0.42545
AMD1	33	156	-0.147404	0.0578551	-0.205259	0.0140679	0.42545
SSH2	19	170	-0.200532	0.00444331	-0.204975	0.0242818	0.42545
ZC3H13	50	139	-0.178671	0.00996803	-0.188639	0.0712991	0.42545
NUB1	16	173	-0.144412	0.0387431	-0.183155	0.0610272	0.42545
UQCRC2	17	172	-0.222108	-0.0530287	-0.169079	0.184514	0.42545
PAPOLG	6	183	-0.474597	0.111805	-0.586402	0.0343853	0.425659
ZFR	5	184	-0.45787	0.0349854	-0.492855	0.0729929	0.425659
RPS13	29	160	-0.544602	-0.0613032	-0.483298	0.0172719	0.425659
LBR	6	183	-0.417166	0.0416088	-0.458775	0.0484862	0.425659
CDK9	11	178	-0.438687	0.00453908	-0.443226	0.120163	0.425659
TNFSF4	4	185	-0.425552	0.0124765	-0.438029	0.119503	0.425659
EGLN2	12	177	-0.234102	0.0723365	-0.306439	0.0493865	0.425659
CLEC4D	19	170	-0.199546	0.0915798	-0.291126	0.0375816	0.425659
GLYCTK	44	145	-0.18187	0.0631465	-0.245016	0.0138622	0.425659
MSH3	23	166	-0.190323	0.0471011	-0.237424	0.00498579	0.425659
MLST8	16	173	-0.211179	0.0235152	-0.234695	0.018676	0.425659
RPL34	45	144	-0.253121	-0.025322	-0.227799	0.0440557	0.425659
SP8	16	173	-0.145472	-0.0239188	-0.121553	0.261127	0.425659
CARD11	15	174	-0.313932	-0.00134005	-0.312592	0.0357332	0.432488
TMPRSS11D	33	156	-0.183577	0.0616343	-0.245211	0.00853788	0.432963
MN1	32	157	-0.173329	-0.0273952	-0.145934	0.0991034	0.432963
PGF	31	158	-0.138819	-0.0118086	-0.12701	0.0921189	0.433207
VN1R5	5	184	-0.70545	0.119786	-0.825237	0.0812591	0.434594
USP8	20	169	-0.415854	0.141148	-0.557002	0.00682885	0.438587
UBB	48	141	-0.477227	-0.0780083	-0.399219	0.0156412	0.438587
CDH10	6	183	-0.843094	0.0613504	-0.904445	0.0571388	0.44122
PIN1	26	163	-0.153585	0.00924214	-0.162827	0.0395044	0.441512
PPP1R16A	13	175	-0.13556	0.0208779	-0.156438	0.0960271	0.441809
MOXD1	35	154	-0.107131	0.075301	-0.182432	0.0113608	0.442112
MASTL	43	146	-0.233558	-0.000529423	-0.233029	0.0429726	0.443622
VCX3A	22	167	-0.27483	0.0611756	-0.336006	0.0115295	0.447598
COX5A	15	174	-0.53804	-0.0751306	-0.462909	0.0406586	0.448275
NDUFV3	27	162	-0.19416	0.1016	-0.295761	0.00460193	0.448275
PARP15	11	178	-0.256214	0.0113015	-0.267516	0.0295376	0.448621
EFCAB11	35	154	-0.183365	-0.0400298	-0.143335	0.0820013	0.448973
DDX47	17	172	-0.451589	-0.0320852	-0.419504	0.0653104	0.44933
GUK1	7	182	-0.482442	0.0635795	-0.546021	0.043481	0.449693
KCNE2	26	163	-0.277575	-0.0115526	-0.266023	0.00225344	0.450061
SPNS1	17	172	-0.209671	-0.0209234	-0.188747	0.0759004	0.451704
MMAB	17	172	-0.162857	0.0361165	-0.198973	0.087727	0.452089
ZSCAN20	15	174	-0.2974	0.0311696	-0.32857	0.00239717	0.452479
GAA	9	180	-0.353487	0.0261807	-0.379668	0.035755	0.452874
SRSF2	7	182	-0.449865	0.0657957	-0.515661	0.0667609	0.454096
GRIN3A	16	173	-0.275777	-0.00520883	-0.270568	0.0155554	0.454096
ATIC	18	171	-0.204581	0.0197174	-0.224299	0.158687	0.454096
LDHAL6B	14	175	-0.0996573	0.127988	-0.227645	0.0248394	0.45494
RBP4	28	161	-0.106875	0.0479577	-0.154833	0.093014	0.45494
ISG20	16	173	-0.376555	0.0136362	-0.390191	0.00832248	0.45537
MED14	23	165	-0.676273	0.139639	-0.815912	0.00123259	0.456698
SRSF3	15	174	-0.390393	-0.00194463	-0.388448	0.0424671	0.456698
ZFP2	13	176	-0.365654	0.00481875	-0.370473	0.00318728	0.456698
CPSF6	13	176	-0.327302	0.111435	-0.438738	0.00226055	0.457152
C20orf151	2	187	-0.595444	0.0574959	-0.65294	9.39604e-06	0.457677
TSPO2	14	175	-0.273256	0.0543455	-0.327601	0.0186286	0.457677
TAGLN	35	154	-0.174826	0.0348933	-0.20972	0.0230134	0.457677
POLR2J2	44	145	-0.112082	0.0357316	-0.147813	0.0510703	0.457677
TMED5	19	170	-0.210255	0.00710413	-0.217359	0.0633344	0.459517
NDUFA8	14	175	-0.193225	0.0220436	-0.215268	0.081459	0.460008
SDHD	32	157	-0.248215	-0.03867	-0.209545	0.0199199	0.460506
EGR3	63	126	-0.224122	0.0287351	-0.252857	0.000396099	0.46152
CDH20	77	112	-0.0759944	0.0925742	-0.168569	0.0192787	0.46152
MATK	39	150	-0.0344498	0.046684	-0.0811338	0.186264	0.463433
WNT1	15	174	-0.245682	0.00762851	-0.253311	0.0151304	0.464497
FAM108B1	21	168	-0.188322	0.0279945	-0.216316	0.0558276	0.464497
MED9	46	143	-0.22717	0.0909957	-0.318165	0.000901148	0.465588
SLC12A6	21	168	-0.176522	0.0574474	-0.23397	0.0141747	0.465588
PTDSS1	13	176	-0.0838049	0.0374331	-0.121238	0.0817425	0.46902
CD9	19	170	-0.320843	-0.00855376	-0.31229	0.0288168	0.472521
NAALADL1	5	184	-0.399068	0.034411	-0.433479	0.0523113	0.473115
TFPI	8	181	-0.363663	0.0407232	-0.404387	0.0883929	0.473445
MRAS	8	181	-0.254981	0.00281812	-0.257799	0.144705	0.473445
USP14	27	162	-0.120217	0.0270499	-0.147267	0.0512548	0.473445
FAM186A	15	174	-0.236253	0.143924	-0.380177	0.0505816	0.474061
GULP1	10	179	-0.292373	-0.0135646	-0.278808	0.0387816	0.47619
SRRM2	17	172	-0.234689	-0.0653414	-0.169348	0.202992	0.476827
SKA2	8	181	-0.838601	0.0242437	-0.862844	0.0600181	0.480496
HLTF	5	184	-0.548584	0.00372239	-0.552307	0.0596538	0.480496
RPP40	25	164	-0.485401	-0.0247531	-0.460648	0.0115076	0.480496
USP21	3	186	-0.432571	0.0279291	-0.4605	0.157443	0.480496
PLCZ1	14	175	-0.234078	0.158538	-0.392615	0.00157836	0.480496
NPR2	37	152	-0.265038	0.0841966	-0.349235	0.00475138	0.480496
HCN2	37	152	-0.210582	0.114638	-0.32522	0.00662726	0.480496
STRA13	9	180	-0.244436	0.0411674	-0.285604	0.121438	0.480496
ETV7	15	174	-0.250424	0.0203202	-0.270744	0.0249917	0.480496
EFCAB3	8	181	-0.199562	0.0374499	-0.237012	0.127571	0.480496
UFD1L	27	162	-0.216372	0.0135649	-0.229937	0.00691749	0.480496
TM9SF2	42	147	-0.157787	0.0436159	-0.201403	0.0039379	0.480496
FKBP9	14	175	-0.162501	0.0323874	-0.194888	0.115833	0.480496
GABRR3	10	179	-0.155401	0.0372429	-0.192644	0.0427762	0.480496
SRI	15	174	-0.204797	-0.0311124	-0.173685	0.0455434	0.480496
SDF4	33	156	-0.158478	0.0130574	-0.171535	0.0833556	0.480496
FYCO1	44	145	-0.107433	0.0490394	-0.156472	0.00959349	0.480496
PRKCDBP	36	153	-0.0834791	0.0661018	-0.149581	0.0337776	0.480496
VPS41	12	177	-0.128079	0.0122532	-0.140332	0.111472	0.480496
USP46	32	157	-0.0629646	0.0331713	-0.0961359	0.0702655	0.480496
ADRA1A	64	125	0.0812546	0.142509	-0.061254	0.26094	0.480496
ELANE	35	153	-0.087184	0.0345471	-0.121731	0.0596895	0.48125
JARID2	24	165	-0.138209	0.0299425	-0.168151	0.087074	0.482012
SRPR	33	156	-0.340305	0.0763884	-0.416694	0.00495599	0.484347
KLRB1	21	168	-0.231907	0.00109743	-0.233004	0.0250026	0.484347
LYRM2	29	160	-0.126562	0.0712788	-0.19784	0.0201569	0.484347
OGDH	13	176	-0.545351	-0.0282858	-0.517065	0.044998	0.486797
STS	31	157	-0.106276	0.0379626	-0.144238	0.0791521	0.487609
APC	22	167	-0.40589	0.039808	-0.445698	0.0166753	0.489258
SPINK1	12	177	-0.251494	0.0177487	-0.269243	0.0248917	0.489258
GJB3	15	174	-0.201711	0.160073	-0.361785	0.00374357	0.491797
ABHD11	19	170	-0.156899	0.119297	-0.276196	0.0329497	0.491797
CLEC3B	45	144	-0.158482	0.0964821	-0.254964	0.00546205	0.491797
POC1A	44	145	-0.117461	0.03958	-0.157041	0.0642718	0.491809
ATP6AP2	23	165	-0.120827	0.0360393	-0.156866	0.0210954	0.491809
POLA2	5	184	-0.547453	-0.00608813	-0.541364	0.0383136	0.492682
POLR3K	21	168	-0.235845	0.0255849	-0.26143	0.00633298	0.492715
CDK7	25	164	-0.100096	0.028246	-0.128342	0.130477	0.492715
WDR86	16	173	-0.397577	-0.0563225	-0.341254	0.0481137	0.493607
SNRPG	5	184	-0.583897	-0.0713941	-0.512503	0.282104	0.494045
AP2S1	20	169	-0.481714	-0.0172267	-0.464488	0.0365882	0.494045
SOX13	6	183	-0.406785	0.0213009	-0.428086	0.0711576	0.494045
GUSBP2	15	174	-0.330002	0.0956015	-0.425603	0.0262745	0.494045
ZNF566	10	179	-0.368775	0.00588832	-0.374664	0.0248109	0.494045
SSRP1	9	180	-0.303849	0.0365867	-0.340436	0.191542	0.494045
PPP1R8	34	155	-0.229907	0.101048	-0.330955	0.0162801	0.494045
TPR	5	184	-0.298239	0.0254385	-0.323677	0.1182	0.494045
DTX3	8	181	-0.291013	0.0231023	-0.314115	0.0417304	0.494045
FAP	13	176	-0.246801	0.0478793	-0.29468	0.0393007	0.494045
RPSA	41	148	-0.374245	-0.0894619	-0.284783	0.0446238	0.494045
SGCB	32	157	-0.130993	0.150297	-0.28129	0.110533	0.494045
EZR	40	149	-0.289095	-0.029454	-0.259641	0.0305732	0.494045
KRT23	18	171	-0.240908	-0.00799203	-0.232916	0.00596379	0.494045
POP7	18	171	-0.173014	0.0543741	-0.227388	0.0496821	0.494045
TMPRSS11B	31	158	-0.089984	0.0744892	-0.164473	0.0232741	0.494045
DEGS2	34	155	-0.0993161	0.0388685	-0.138185	0.104958	0.494045
ATP6V1D	31	158	-0.135493	-0.00594061	-0.129553	0.095402	0.494045
ZCCHC14	31	158	-0.107608	0.0117692	-0.119377	0.127997	0.494045
SLC18A3	29	160	-0.0942564	0.0188309	-0.113087	0.0890312	0.494045
POU4F1	41	148	-0.0758711	0.028824	-0.104695	0.0349964	0.494045
FBXO5	37	152	-0.0927123	-0.00667403	-0.0860383	0.194784	0.494045
DSG4	49	140	0.000840987	0.0624965	-0.0616555	0.248982	0.494045
ISY1	9	180	-0.39776	0.0014069	-0.399167	0.167584	0.496883
SAFB2	38	151	-0.140901	0.0544764	-0.195378	0.0511528	0.49709
APOA5	34	155	-0.0585745	0.0481182	-0.106693	0.200481	0.49709
EEF1A1	21	168	-0.464423	-0.0455865	-0.418837	0.0342331	0.500492
DIEXF	7	182	-0.293857	0.0280075	-0.321864	0.0448537	0.500492
COX6B1	8	181	-0.299512	0.00478247	-0.304294	0.0414614	0.500492
NINL	14	175	-0.255087	0.0451264	-0.300214	0.00920738	0.500492
CBX3	13	176	-0.252991	0.0401754	-0.293167	0.00338823	0.500492
AQR	21	168	-0.290139	-0.0337075	-0.256432	0.0871697	0.500492
POLR3E	18	171	-0.239908	-0.00711693	-0.232792	0.0771234	0.500492
IRX3	19	170	-0.199181	-0.00132879	-0.197853	0.0194033	0.500492
TRIM63	34	155	-0.110437	0.0411281	-0.151566	0.0597889	0.500492
ZNF167	44	145	-0.071777	0.0499897	-0.121767	0.0433595	0.500492
NR2E1	35	154	-0.121776	-0.00559519	-0.11618	0.0981259	0.500492
CAPG	6	183	-0.00555091	0.0233538	-0.0289048	0.446375	0.500492
ADCK3	7	182	-0.225213	0.0564747	-0.281688	0.166454	0.501914
DHCR7	11	178	-0.259136	-0.00399267	-0.255143	0.0307083	0.501914
CHSY1	20	169	-0.06716	0.0216314	-0.0887914	0.169195	0.501914
EEF1A1	21	168	-0.154458	0.0420126	-0.196471	0.0357863	0.506959
FKTN	13	176	-0.199055	-0.0232763	-0.175778	0.0835283	0.510118
POLR2K	13	176	-0.377808	0.0296016	-0.40741	0.0729936	0.511308
SULT1A2	17	172	-0.169032	0.00476711	-0.1738	0.0431136	0.513725
PLD2	57	132	-0.0439499	0.0996031	-0.143553	0.028219	0.513725
LOXL2	63	126	-0.207103	0.0500548	-0.257158	0.000520206	0.514134
NUDT15	48	141	-0.083738	0.0207845	-0.104522	0.10848	0.514134
MXD3	10	179	-0.242483	0.0896109	-0.332094	0.0156436	0.514994
TANK	13	176	-0.237659	-0.00462892	-0.23303	0.00863709	0.514994
SLC12A2	21	168	-0.129083	0.0475815	-0.176664	0.013615	0.514994
HIST1H2BB	18	171	-0.138147	0.031794	-0.169941	0.0490597	0.514994
CTNNBL1	6	183	-0.925573	-0.0594409	-0.866132	0.054608	0.515582
FADS2	8	181	-0.417672	0.0532424	-0.470915	0.000111494	0.515582
PLD1	6	183	-0.365957	0.0766455	-0.442602	0.0965872	0.515582
CIRH1A	23	166	-0.334692	0.0476733	-0.382365	0.0781687	0.515582
HIST4H4	17	172	-0.204578	0.106788	-0.311366	0.0670208	0.515582
CAV3	26	163	-0.218586	0.0747277	-0.293314	0.016984	0.515582
ZNF578	12	177	-0.110858	0.0189212	-0.129779	0.0761084	0.515582
PGM2	42	147	-0.129983	0.0150244	-0.145007	0.0165181	0.51688
ETV5	7	182	-0.59122	-0.0246316	-0.566588	0.0772428	0.519515
XAB2	33	156	-0.47112	-0.0692795	-0.401841	0.00165243	0.519515
SCAF11	14	175	-0.202298	0.0106239	-0.212922	0.0183865	0.520047
TAPBPL	18	171	-0.149132	0.0166188	-0.165751	0.108854	0.520047
PTPMT1	12	177	-0.263708	0.0470796	-0.310788	0.00752002	0.520593
NOVA1	37	152	-0.123002	0.0136648	-0.136667	0.0367993	0.520593
RAD23B	13	176	-0.257194	-0.00760407	-0.24959	0.0792365	0.521154
DNAJB12	22	167	-0.0344268	0.0622444	-0.0966712	0.119175	0.521154
GPR139	21	168	-0.127103	0.212308	-0.339412	0.0316503	0.521729
CA12	11	178	-0.208965	0.00599039	-0.214956	0.0390334	0.521729
ADCK2	16	173	-0.188639	0.0669943	-0.255634	0.0527062	0.525326
AKR1B1	18	171	-0.188994	-0.0155962	-0.173398	0.165622	0.525941
SLC39A8	46	143	-0.112253	0.034101	-0.146354	0.0194161	0.525941
PNPT1	9	180	-0.372433	0.0264867	-0.398919	0.179534	0.527374
BIRC5	8	181	-0.372691	-0.0627984	-0.309893	0.176969	0.528018
RASL10A	32	157	-0.210747	-0.00338661	-0.20736	0.0138929	0.528018
RPS27A	12	177	-0.396309	0.0191666	-0.415476	0.04449	0.530153
ZNF182	20	169	-0.157056	0.00193088	-0.158987	0.0480109	0.530153
AKNA	15	174	-0.0997366	0.0221443	-0.121881	0.220623	0.530153
PRKD3	5	184	-0.303118	0.0799413	-0.383059	0.0468222	0.530842
LRPPRC	7	182	-0.194805	-0.0387805	-0.156025	0.174443	0.530842
ST3GAL5	6	183	-0.329312	0.0440584	-0.373371	0.00682238	0.53147
FOXD4L3	17	169	-0.286261	-0.0785565	-0.207704	0.137686	0.53147
ZP3	20	169	-0.151361	0.0187473	-0.170108	0.113142	0.53147
ALOX15B	59	130	-0.131778	0.023519	-0.155297	0.00420838	0.53147
C2orf49	9	180	-0.096965	0.042564	-0.139529	0.0898584	0.53147
PSMC5	9	180	-0.996342	-0.0721794	-0.924163	0.0578283	0.532152
DPM2	12	177	-0.193069	0.198364	-0.391433	0.066564	0.532152
SSB	10	179	-0.309837	0.073835	-0.383672	0.0275498	0.532152
PREB	5	184	-0.433406	-0.052244	-0.381162	0.0547505	0.532152
RPS15A	18	171	-0.448307	-0.0952882	-0.353019	0.073879	0.532152
GSK3A	14	175	-0.168421	0.0704819	-0.238903	0.127118	0.532152
FBXW4P1	28	161	-0.246458	-0.0106531	-0.235805	0.0177209	0.532152
MYL10	18	171	-0.209218	0.0173801	-0.226599	0.0131484	0.532152
ZNF473	13	176	-0.406719	0.00963608	-0.416355	0.0181172	0.532155
PAX8	9	180	-0.25979	-0.0127638	-0.247026	0.0108761	0.532155
MED17	26	163	-0.164237	0.0730515	-0.237289	0.00589505	0.532155
KIF6	13	176	-0.162477	0.105368	-0.267845	0.0115987	0.53218
PGBD1	17	172	-0.186192	0.0618109	-0.248003	0.00858125	0.53218
SLC16A9	27	162	-0.0806497	0.0294564	-0.110106	0.0445117	0.53218
HUWE1	22	167	-0.279727	0.0564114	-0.336139	0.0233256	0.533783
SRCAP	16	173	-0.266886	-0.0185575	-0.248329	0.0290978	0.537041
PSMC1	34	155	-0.063884	0.0216632	-0.0855472	0.234872	0.537041
EPN1	11	178	-0.187903	0.00372654	-0.19163	0.0475847	0.538696
CD5	8	181	-0.302785	0.0399928	-0.342778	0.0246725	0.541271
TPMT	20	169	-0.339927	-0.0510526	-0.288874	0.0232211	0.541271
DHFR	22	167	-0.0640538	0.0194893	-0.0835432	0.122081	0.541271
SNRNP70	18	171	-0.451637	-0.0107893	-0.440848	0.0359214	0.542192
SLCO1B7	13	176	-0.235809	0.0347932	-0.270602	0.0378137	0.542192
CUL2	39	150	-0.109008	0.021697	-0.130705	0.054065	0.543915
EDA2R	8	181	-0.180261	0.000609475	-0.180871	0.0162014	0.545656
PPIG	10	179	-0.275648	0.0167106	-0.292359	0.0166217	0.546628
LOC100192204	54	135	-0.0354916	0.0514258	-0.0869175	0.0871896	0.546628
GCG	13	176	-0.115836	-0.00820974	-0.107626	0.175064	0.548405
UBE2R2	37	152	-0.157794	0.0211559	-0.17895	0.0164392	0.549413
CTDNEP1	61	128	-0.055565	0.0739948	-0.12956	0.00826186	0.549413
ZNF174	20	169	-0.0882943	0.0358733	-0.124168	0.158234	0.55044
EXOSC7	45	144	-0.083137	0.0131012	-0.0962382	0.133013	0.55044
DIDO1	2	187	-0.487975	0.0216501	-0.509626	0.199613	0.553513
PPP4C	17	172	-0.315904	0.0404934	-0.356397	0.0649605	0.553513
FGF22	37	152	-0.253148	0.0767221	-0.32987	0.00713818	0.553513
FDXR	5	184	-0.308468	0.015222	-0.32369	0.0543035	0.553513
TPI1	18	171	-0.273133	0.0238033	-0.296937	0.0381972	0.553513
G3BP1	10	179	-0.23835	0.0577965	-0.296146	0.00495207	0.553513
NFIC	39	150	-0.248316	0.0399075	-0.288224	0.0171124	0.553513
FBXW2	14	175	-0.242942	0.0248844	-0.267827	0.0213887	0.553513
SRBD1	8	181	-0.26308	-0.0345738	-0.228507	0.205779	0.553513
CYP51A1	14	175	-0.169722	0.049484	-0.219206	0.0700596	0.553513
SULT1B1	38	151	-0.224151	-0.0248847	-0.199266	0.0211747	0.553513
ZNF701	12	177	-0.200188	-0.00942254	-0.190765	0.0705603	0.553513
GBX1	16	173	-0.161263	0.0170896	-0.178353	0.0174036	0.553513
ALPK2	75	114	-0.129744	0.0447405	-0.174485	0.01632	0.553513
GART	24	165	-0.135144	0.0346449	-0.169789	0.113472	0.553513
GOT1	30	159	-0.0899372	0.0747387	-0.164676	0.0373884	0.553513
NDUFA5	19	170	-0.202843	-0.0396116	-0.163232	0.051582	0.553513
SENP3-EIF4A1	63	126	-0.10898	0.0465745	-0.155554	0.0172224	0.553513
MAF	29	160	-0.109389	0.0393944	-0.148783	0.027262	0.553513
IL17A	15	174	-0.170865	-0.0242196	-0.146645	0.142326	0.553513
INTS4L2	14	175	-0.424356	-0.0979573	-0.326399	0.0914941	0.553932
RAB36	26	163	-0.202691	0.0447242	-0.247416	0.0255903	0.553932
AQP12A	30	159	-0.126577	0.00674916	-0.133326	0.105444	0.553932
IARS2	5	184	-0.713044	-0.0783569	-0.634687	0.243989	0.557521
DDX3Y	184	5	0.0837053	0.630773	-0.547067	0.1546	0.557521
PCDHGC3	11	178	-0.298107	0.0841744	-0.382282	0.057603	0.557521
INCENP	10	179	-0.35506	-7.72499e-05	-0.354983	0.0612935	0.557521
HDAC3	11	178	-0.259727	0.0289367	-0.288664	0.0326401	0.557521
PCDHB9	11	178	-0.210062	0.072978	-0.28304	0.0369974	0.557521
CDK3	7	182	-0.281043	-0.0139797	-0.267064	0.0233868	0.557521
CDC25B	18	171	-0.186934	0.0505558	-0.23749	0.0217096	0.557521
GTF3C3	11	178	-0.248957	-0.0140413	-0.234916	0.0724517	0.557521
FTSJ2	16	173	-0.157101	0.0681795	-0.22528	0.0593501	0.557521
PCDH8	44	145	-0.149731	0.0717503	-0.221481	0.0230166	0.557521
WRAP53	63	126	-0.195563	0.0211068	-0.21667	0.00643726	0.557521
KIF6	13	176	-0.133552	0.0478274	-0.18138	0.0331346	0.557521
ZNF200	19	170	-0.173984	0.00421543	-0.178199	0.0512783	0.557521
PIK3CA	8	181	-0.358977	-0.186664	-0.172314	0.357712	0.557521
DLST	32	157	-0.142904	0.00222277	-0.145127	0.164231	0.557521
CRK	55	134	-0.0924303	0.0408754	-0.133306	0.110271	0.557521
ECHDC3	56	133	-0.0538641	0.0649998	-0.118864	0.078842	0.557521
ZNF438	74	115	-0.0674598	0.0286289	-0.0960887	0.135607	0.557521
CTLA4	16	173	-0.115289	-0.0203361	-0.0949526	0.215057	0.557521
SCARF1	55	134	-0.01717	0.0567506	-0.0739206	0.203084	0.557521
GPR182	10	179	-0.25646	-0.0052325	-0.251227	0.0552268	0.558878
PTH2R	19	170	-0.0655539	0.0344107	-0.0999646	0.0815761	0.558878
SLC25A20	45	144	-0.075219	0.12141	-0.196629	0.0479147	0.559509
C14orf166	31	158	-0.131597	-0.00448487	-0.127112	0.143598	0.559509
TGFBR2	33	156	-0.0827433	0.0101393	-0.0928826	0.10745	0.559509
UGT1A7	22	167	-0.144439	0.0440018	-0.188441	0.0419703	0.56091
KIT	32	157	-0.047281	0.0525551	-0.0998361	0.0695753	0.56091
RAC1	15	174	-0.127221	0.0549685	-0.182189	0.255756	0.563035
R3HDM2	10	179	-0.124601	0.0506822	-0.175284	0.0144256	0.563035
PPIL6	34	155	-0.121404	0.0356934	-0.157097	0.0675019	0.563035
TXN2	37	152	-0.0774039	0.0158403	-0.0932443	0.113949	0.563035
FBXO18	52	137	-0.0561727	0.000220155	-0.0563929	0.259414	0.563035
IMPDH2	45	144	-0.181	0.0031976	-0.184197	0.046486	0.563761
PLAU	21	168	-0.169179	0.0131811	-0.18236	0.0204702	0.563761
CYB5R2	36	153	-0.0764284	0.0148512	-0.0912795	0.158933	0.563761
TPI1P3	33	156	-0.129716	0.111048	-0.240764	0.0386029	0.565255
CBS	27	162	-0.0895555	-0.0510157	-0.0385397	0.341566	0.565255
CPSF3	9	180	-0.472496	-0.103483	-0.369013	0.14176	0.566772
XRN1	6	183	-0.321942	0.038074	-0.360016	0.0792024	0.566772
HOXC8	11	178	-0.230545	0.0106606	-0.241206	0.0641519	0.569057
INS	36	153	-0.20657	0.0545558	-0.261126	0.00665535	0.571368
PGRMC2	43	146	-0.187452	-0.0028112	-0.18464	0.0661381	0.573707
OTUD7A	19	170	-0.254077	0.0130691	-0.267146	0.0679346	0.574575
CTRL	24	165	-0.127332	0.0371652	-0.164497	0.115291	0.574575
ALDH3A1	47	142	-0.0173129	0.0215373	-0.0388502	0.269685	0.574575
ABHD14B	44	145	-0.10384	0.0238514	-0.127691	0.148538	0.576964
SLC4A11	19	170	-0.303552	-0.011712	-0.29184	0.078038	0.578829
ENPP4	16	173	-0.204948	-0.0200287	-0.18492	0.0612721	0.578829
ACOX1	7	182	-0.172178	0.00792193	-0.1801	0.0485134	0.578829
ZNF493	22	167	-0.142638	0.0308909	-0.173529	0.0131694	0.578829
ZNF205	18	171	-0.115124	0.0538492	-0.168973	0.0689011	0.578829
HIST1H2BJ	18	171	-0.109793	0.00632929	-0.116122	0.112196	0.578829
NFYC	9	180	-0.418077	0.0190332	-0.43711	0.0232085	0.579803
ANKRD49	25	164	-0.268383	0.0552769	-0.32366	0.00327108	0.579803
ATP6V1A	12	177	-0.276153	0.00177361	-0.277926	0.0719854	0.579803
HIST1H3D	20	169	-0.241484	0.113763	-0.355246	0.00810472	0.580806
TMEM11	46	143	-0.078648	0.035746	-0.114394	0.0999706	0.580806
PRSS23	23	166	0.0456552	0.0682036	-0.0225483	0.448759	0.580806
AP2S1	20	169	-0.19381	0.00427977	-0.19809	0.0272986	0.583323
VCX3B	22	166	-0.255268	0.0642594	-0.319528	0.0135499	0.58587
SOS1	5	184	-0.534411	0.0456081	-0.580019	0.176953	0.588163
PHF20	3	186	-0.518817	0.0160452	-0.534863	0.210118	0.588163
RUVBL2	18	171	-0.572867	-0.0691803	-0.503687	0.0505949	0.588163
ZNF529	9	180	-0.251585	0.0553356	-0.306921	0.0332542	0.588163
MRPL37	13	176	-0.230735	0.0347731	-0.265508	0.0570649	0.588163
CSNK1G2	36	153	-0.14341	0.102871	-0.246282	0.000886441	0.588163
CCL18	22	167	-0.213116	-0.00150042	-0.211616	0.0120336	0.588163
WDSUB1	13	176	-0.20057	-0.009786	-0.190784	0.0334387	0.588163
SEC13	25	164	-0.18719	-0.00420265	-0.182987	0.0182458	0.588163
LRP6	19	170	-0.153928	0.0275911	-0.181519	0.0202537	0.588163
FAM18A	17	172	-0.165873	-0.00829432	-0.157578	0.022867	0.588163
PNLIP	31	158	-0.144232	0.0129299	-0.157162	0.0294269	0.588163
SERHL2	41	148	-0.0743265	0.0592003	-0.133527	0.0368078	0.588163
ICOS	17	172	-0.12499	0.00587882	-0.130869	0.212666	0.588163
ALOX12B	59	130	-0.0465455	0.0456501	-0.0921956	0.129396	0.588163
UBC	17	172	-0.77706	-0.224693	-0.552367	0.0547625	0.588636
LCLAT1	5	184	-0.421804	0.0205669	-0.442371	0.0183719	0.588636
SKIV2L2	23	166	-0.336956	0.0211307	-0.358087	0.0323846	0.588636
ZNF780B	9	180	-0.232208	0.068657	-0.300865	0.0651672	0.588636
SOAT1	6	183	-0.428902	0.00423313	-0.433135	0.152436	0.589143
CTSF	6	183	-0.341059	0.0468078	-0.387866	0.01929	0.589143
RAB7A	9	180	-0.141557	-0.0190767	-0.12248	0.210573	0.589143
SLC17A4	18	171	-0.0328502	0.00764118	-0.0404914	0.356363	0.589143
UBL4A	2	187	-0.395286	-0.024355	-0.370931	0.297359	0.589541
NPR3	4	185	-0.327039	0.0309254	-0.357964	0.129753	0.589541
KTN1	31	158	-0.190898	0.0320776	-0.222976	0.0514907	0.589541
C1QBP	59	130	-0.166814	0.0540506	-0.220865	0.00981366	0.589541
NT5E	30	159	-0.169311	0.0387701	-0.208081	0.0526437	0.589541
SLC25A16	23	166	-0.150517	0.0286033	-0.17912	0.0533036	0.589541
AGAP4	47	132	-0.07812	0.0760448	-0.154165	0.0191713	0.589541
ADAMTS7	16	173	-0.10532	0.0334233	-0.138744	0.134817	0.589541
ZNF396	51	138	-0.0657525	0.0143897	-0.0801422	0.141926	0.589541
RNF114	3	186	-0.325874	0.0158376	-0.341712	0.000650761	0.590877
MFN2	29	160	-0.209375	0.0198762	-0.229251	0.0145533	0.590877
PSMC6	31	158	-0.0188134	0.00468082	-0.0234942	0.412648	0.590877
MAT1A	27	162	-0.240973	0.0620078	-0.302981	0.0139234	0.591527
RASGEF1A	27	162	-0.130868	0.0311255	-0.161994	0.0290111	0.591527
PDCD4	31	158	-0.0890846	0.0550428	-0.144127	0.0757791	0.591527
AASDHPPT	29	160	-0.0513106	0.0713479	-0.122659	0.163908	0.591527
ATP6V0B	8	181	-0.367322	-0.0169336	-0.350388	0.122782	0.592929
AKR1B10	18	171	-0.205253	-0.0121686	-0.193085	0.0512026	0.592929
SLC4A1	18	171	-0.113517	0.00112215	-0.114639	0.207946	0.592929
RAB5B	10	179	-0.0984265	0.063192	-0.161618	0.162424	0.594363
PRKAG1	15	174	-0.125126	0.00414593	-0.129272	0.252191	0.594363
GLRX3	41	148	-0.0557147	0.0189811	-0.0746958	0.220471	0.594363
FLAD1	2	187	-0.527156	0.00651266	-0.533668	0.0666157	0.595831
EXOSC4	12	176	-0.216756	0.0942508	-0.311007	0.0375001	0.595831
DPP4	13	176	-0.157047	0.0218676	-0.178915	0.0539244	0.595831
ZNF479	11	178	-0.359169	-0.0369773	-0.322192	0.136102	0.596618
CCT2	12	177	-0.239221	0.043894	-0.283115	0.0176711	0.596618
FBXL19	14	175	-0.167477	0.042	-0.209477	0.143666	0.596618
DGKB	17	172	-0.137036	-0.0203182	-0.116718	0.169008	0.596618
U2SURP	7	182	-0.264539	0.0154193	-0.279958	0.110686	0.596732
CEL	10	179	-0.220629	0.0273262	-0.247955	0.20103	0.596732
CCL13	21	168	-0.214256	-0.033726	-0.18053	0.133726	0.596732
PARP1	6	183	-0.184691	-0.0101896	-0.174501	0.238981	0.596732
POLG	17	172	-0.128344	0.0369227	-0.165267	0.15596	0.596732
OXA1L	37	152	-0.0611279	-0.017193	-0.0439349	0.361521	0.599726
ITPR3	15	174	-0.303724	0.06657	-0.370294	0.110166	0.600142
GNB2L1	16	173	-0.285354	0.0612364	-0.34659	0.0598342	0.600142
FH	7	182	-0.276166	0.0335553	-0.309721	0.0693796	0.600142
CLCA3P	16	173	-0.229052	0.0504771	-0.279529	0.00514007	0.600142
LIG1	19	170	-0.191875	-0.00844405	-0.183431	0.063611	0.600142
TMED7-TICAM2	19	170	-0.161362	0.0106252	-0.171987	0.0336969	0.600142
RFX2	36	153	-0.14235	0.00701123	-0.149361	0.0638405	0.600142
ETV1	18	171	-0.0924664	0.0304958	-0.122962	0.178094	0.600142
SPEG	16	173	-0.10226	0.0169356	-0.119196	0.252088	0.600142
RNF152	77	112	-0.0427608	0.0746585	-0.117419	0.0410308	0.600142
NIT1	3	186	-0.247384	0.0379419	-0.285326	0.159081	0.602526
GPR155	10	179	-0.132424	0.0507514	-0.183175	0.111091	0.602526
ALDH1A3	18	171	-0.202284	0.0443423	-0.246626	0.0422733	0.605289
LRP1	10	179	-0.243783	-0.00188547	-0.241898	0.0837491	0.605289
NT5DC1	33	156	-0.114783	0.0977355	-0.212519	0.0333359	0.605289
DSCAM	30	159	-0.110246	0.0313061	-0.141552	0.00979234	0.605289
AGXT2L1	45	144	-0.0823765	0.0221509	-0.104527	0.0409338	0.605289
EXOSC3	40	149	-0.0786933	0.0212588	-0.0999521	0.101538	0.605289
ENPP6	59	130	-0.0666399	0.00383718	-0.0704771	0.150843	0.605289
COPE	21	168	-0.617591	-0.0419541	-0.575637	0.00283801	0.605587
FAM108A1	36	153	-0.272128	0.209648	-0.481776	2.25033e-05	0.605587
IL28B	9	180	-0.268134	0.0829774	-0.351111	0.10011	0.605587
GPR152	7	182	-0.323567	0.0196693	-0.343236	0.125392	0.605587
BCAS2	18	171	-0.273244	0.0212545	-0.294498	0.069337	0.605587
IREB2	16	173	-0.207656	0.0844641	-0.29212	0.0259438	0.605587
RBCK1	16	173	-0.241653	0.0263393	-0.267992	0.0797536	0.605587
CHD6	11	178	-0.227377	0.0363593	-0.263736	0.00832923	0.605587
DNAJB11	8	181	-0.279735	-0.0199815	-0.259754	0.0646423	0.605587
SPPL2B	37	152	-0.106721	0.136427	-0.243148	0.00378073	0.605587
TMX3	70	119	-0.0729936	0.169013	-0.242007	0.00980412	0.605587
CHPT1	14	175	-0.212115	0.0211698	-0.233285	0.0443125	0.605587
THRAP3	15	174	-0.215767	0.0163814	-0.232148	0.0316327	0.605587
PTPN23	43	146	-0.216514	0.00928817	-0.225802	0.0251631	0.605587
RAG2	18	171	-0.199279	0.00914245	-0.208421	0.0706001	0.605587
RPSAP9	21	168	-0.293631	-0.0863236	-0.207308	0.168649	0.605587
PPP1R15A	18	171	-0.158693	0.034474	-0.193167	0.0826572	0.605587
RAVER1	22	167	-0.184962	0.000766708	-0.185729	0.0755941	0.605587
MAP3K2	14	175	-0.117801	0.0339639	-0.151765	0.172667	0.605587
C1QTNF5	32	157	-0.0603103	0.0745476	-0.134858	0.0703496	0.605587
MFRP	32	157	-0.0603103	0.0745476	-0.134858	0.0703496	0.605587
KIF13B	64	125	-0.119652	0.0111099	-0.130762	0.0411052	0.605587
CGB	18	171	-0.108699	0.0198624	-0.128562	0.125656	0.605587
CGB7	18	171	-0.108699	0.0198624	-0.128562	0.125656	0.605587
CGB2	18	171	-0.108699	0.0198624	-0.128562	0.125656	0.605587
HTR1D	30	159	-0.122306	0.00480589	-0.127112	0.0139338	0.605587
PCDHB10	11	178	-0.150214	-0.0314964	-0.118718	0.183036	0.605587
ZNF232	58	131	-0.0661268	0.0518682	-0.117995	0.0665594	0.605587
ZADH2	77	112	-0.0540388	0.0293107	-0.0833495	0.0694803	0.605587
PLK4	42	147	0.0392074	0.107292	-0.0680845	0.279661	0.605587
PTPN13	45	144	-0.0422799	0.000845134	-0.043125	0.225797	0.605587
ITGA9	41	148	-0.00777529	0.0303165	-0.0380918	0.369235	0.605587
CHAF1A	38	151	0.0506847	0.054629	-0.00394431	0.484456	0.605587
HLA-DRB4	26	163	0.00309983	0.00347588	-0.000376047	0.498299	0.605587
COX11	7	182	-1.09402	-0.03591	-1.05811	0.0663202	0.60593
RPAP1	22	167	-0.483364	0.0163653	-0.499729	0.0264449	0.60593
TIE1	7	182	-0.330324	0.0241744	-0.354498	0.0391586	0.60593
KLK13	16	173	-0.316719	0.0312543	-0.347973	0.0305321	0.60593
PLXNA1	10	179	-0.249815	0.0830985	-0.332913	0.0434857	0.60593
ANAPC2	9	178	-0.163808	0.123463	-0.287272	0.195648	0.60593
AKAP9	14	175	-0.257033	0.0122778	-0.26931	0.0439779	0.60593
EIF4E	45	144	-0.228358	0.00467016	-0.233028	0.0303226	0.60593
GRK1	41	148	-0.225986	0.00625273	-0.232238	0.0265051	0.60593
COX7C	24	165	-0.239831	-0.00960984	-0.230221	0.0631253	0.60593
NUP54	38	151	-0.273442	-0.043546	-0.229896	0.042622	0.60593
ZNF768	18	170	-0.213031	0.00414521	-0.217176	0.0116168	0.60593
ARHGEF19	28	161	-0.135853	0.0550006	-0.190853	0.0369838	0.60593
PATE1	33	156	-0.114935	0.0556578	-0.170593	0.00292764	0.60593
PHOX2B	37	152	-0.142267	0.0224555	-0.164723	0.078787	0.60593
TAF11	18	171	-0.102407	0.0616586	-0.164066	0.141235	0.60593
RPS6	68	121	-0.233596	-0.0724874	-0.161109	0.14072	0.60593
CHKA	9	180	-0.149105	0.00380907	-0.152914	0.0774865	0.60593
CSK	14	175	-0.120698	0.0301764	-0.150875	0.0762963	0.60593
CGB8	18	171	-0.108699	0.0198624	-0.128562	0.125656	0.60593
PNN	33	156	-0.0365257	0.0476573	-0.084183	0.232821	0.60593
PTPN2	30	159	-0.0415766	0.0369404	-0.078517	0.187756	0.60593
TWIST2	28	161	-0.0577841	0.00772573	-0.0655098	0.295116	0.60593
SPOCK1	17	172	0.00731265	0.0620545	-0.0547418	0.338002	0.60593
PPP1R12A	19	170	-0.472852	-0.0702238	-0.402628	0.0819758	0.606151
SLAMF7	3	186	-0.360464	0.0411336	-0.401598	0.106544	0.606151
ISY1-RAB43	9	180	-0.39776	0.0014069	-0.399167	0.167584	0.606151
COPS2	22	167	-0.371516	0.0120777	-0.383594	0.0135551	0.606151
UQCRC1	44	145	-0.20633	-0.0150241	-0.191306	0.0558981	0.606151
PHF10	39	150	-0.112255	0.0405604	-0.152815	0.0211798	0.606151
ANXA7	21	168	-0.158427	0.0758379	-0.234265	0.0392275	0.609044
REXO1	36	153	-0.0941901	0.0719329	-0.166123	0.0389366	0.609044
DYRK2	12	177	-0.261971	0.0553083	-0.317279	0.0159874	0.610012
EIF3L	39	150	-0.205194	0.00901188	-0.214205	0.0542527	0.610012
FANCF	23	166	-0.0544763	0.145188	-0.199665	0.0372537	0.610012
RGS11	21	168	-0.082705	0.114591	-0.197296	0.0636976	0.610012
CGB5	18	171	-0.108699	0.0198624	-0.128562	0.125656	0.610012
PSMD3	17	172	-0.463706	0.0184807	-0.482187	0.0224824	0.610379
PLCB3	5	184	-0.391012	0.0420371	-0.433049	0.115244	0.610379
TAF1L	39	150	-0.107161	0.0795122	-0.186673	0.0362972	0.610379
LOC100506422	68	121	-0.0722095	0.0941624	-0.166372	0.014421	0.610379
SENP5	4	185	-0.152801	-0.011671	-0.14113	0.292474	0.610379
NAIP	31	158	-0.087427	0.0513408	-0.138768	0.148039	0.610379
PCBP1	7	182	-0.520545	-0.0256404	-0.494905	0.136866	0.613215
ACTR6	16	173	-0.439215	-0.0325298	-0.406685	0.0800807	0.613215
P2RY6	13	176	-0.24816	0.0425541	-0.290714	0.0302836	0.613215
PTPRZ1	20	169	-0.216968	-0.00225791	-0.21471	0.00767676	0.613215
MAP6	14	175	-0.115696	0.00698357	-0.122679	0.140356	0.613215
CLEC4A	18	171	-0.065017	0.0347914	-0.0998084	0.138498	0.613215
PTDSS2	37	152	-0.0753928	0.0175198	-0.0929126	0.0753142	0.613215
PRSS36	15	174	-0.0868215	0.00591911	-0.0927406	0.229133	0.613215
SLC35A3	19	170	-0.0103469	-0.00465026	-0.00569668	0.483156	0.613215
SIN3A	14	175	-0.228509	0.0462926	-0.274802	0.174999	0.616975
EXOC3	9	180	-0.324072	-0.0168171	-0.307255	0.0940653	0.618834
CPA1	19	170	-0.193863	0.00591265	-0.199776	0.0202575	0.618834
PRSS36	15	174	-0.156488	0.0115415	-0.16803	0.117702	0.618834
CREB3L1	15	174	-0.0923713	0.0111764	-0.103548	0.188506	0.618834
CLEC2D	20	169	-0.348557	-0.0855239	-0.263034	0.0614245	0.620743
DNAJB2	16	173	-0.205457	0.0367793	-0.242237	0.0728844	0.620743
FXYD1	7	182	-0.153907	0.0441206	-0.198027	0.120704	0.620743
ANKRD37	56	133	-0.11679	0.0609701	-0.17776	0.0203509	0.620743
MRPS28	15	174	-0.30994	-0.0251504	-0.28479	0.0583051	0.621408
UBB	48	141	-0.128061	0.0883333	-0.216394	0.0318315	0.621408
DDX19A	23	166	-0.24413	-0.0354086	-0.208722	0.0409751	0.621408
RFPL3	34	155	-0.052167	0.0827792	-0.134946	0.121523	0.621408
SYK	25	164	-0.108231	0.00301699	-0.111248	0.125206	0.621408
NDUFB10	19	170	-0.135646	-0.0288426	-0.106803	0.200072	0.621408
EVPL	7	182	-0.256121	0.0134299	-0.269551	0.0854641	0.623753
PRKRA	10	179	-0.128691	0.107624	-0.236314	0.104759	0.623753
TICAM2	19	170	-0.209029	0.0206198	-0.229648	0.0271696	0.623753
HDAC5	17	172	-0.167171	0.0593128	-0.226484	0.0680929	0.623753
TSN	13	176	-0.216552	-0.00555131	-0.211	0.122669	0.623753
MUSK	14	175	-0.18502	0.0222081	-0.207228	0.0874124	0.623753
TRIM74	19	170	-0.204556	-0.00273091	-0.201825	0.0398911	0.623753
DDX52	21	168	-0.206542	-0.0442441	-0.162298	0.204608	0.623753
AGFG1	18	171	-0.0857768	0.0625007	-0.148278	0.0822022	0.623753
ATP5J2	17	172	-0.101777	0.0308948	-0.132672	0.0481017	0.623753
YME1L1	43	146	-0.103211	0.0239508	-0.127161	0.158598	0.623753
LRRC29	21	168	-0.129518	-0.0129184	-0.1166	0.122603	0.623753
PLA2G3	35	154	-0.0739131	0.0361882	-0.110101	0.0787873	0.623753
CDC42SE2	19	170	-0.0386006	0.0685237	-0.107124	0.211848	0.623753
HILS1	5	184	-0.122596	-0.0194871	-0.103109	0.322743	0.623753
NRIP2	18	171	-0.100766	-0.0126846	-0.0880811	0.269235	0.623753
ADAMTS10	29	160	-0.0200979	0.0626785	-0.0827764	0.151176	0.623753
DHRS4	42	147	-0.0290221	0.030447	-0.0594691	0.224793	0.623753
RBM22	9	180	-0.554703	0.0185598	-0.573263	0.0412282	0.625288
RBM10	20	169	-0.338456	0.0740688	-0.412525	0.0295051	0.625288
PTBP1	36	153	-0.202043	0.065551	-0.267594	0.00264677	0.625288
TAF13	17	172	-0.171485	0.0377989	-0.209284	0.0475316	0.625288
PIR-FIGF	24	164	-0.0616932	0.0279149	-0.0896081	0.17832	0.625288
MAPKAPK2	8	181	-0.172748	-0.0124539	-0.160294	0.0696242	0.628148
PRPSAP2	48	141	-0.0716245	0.0294139	-0.101038	0.0648776	0.628148
VTA1	33	156	-0.0467297	0.0162925	-0.0630221	0.312207	0.628148
SUOX	10	179	-0.153799	0.0206222	-0.174421	0.0627239	0.631064
LOC643955	15	174	-0.185073	-0.0445789	-0.140494	0.264968	0.631064
GTF2A1	35	154	0.0273935	0.0385417	-0.0111482	0.436018	0.631064
RALA	13	176	-0.257101	0.0231281	-0.28023	0.0468096	0.632764
NUAK2	5	184	-0.16466	0.06622	-0.23088	3.00901e-06	0.632764
CYLD	20	169	-0.161517	0.00942619	-0.170943	0.120593	0.632764
HIC1	55	134	-0.0718447	0.0887872	-0.160632	0.0183613	0.632764
HNRNPA1L2	43	146	0.019305	0.0674067	-0.0481018	0.368267	0.632764
DHX9	6	183	-0.84882	-0.129084	-0.719735	0.027352	0.635156
VPS28	13	176	-0.48269	0.00722566	-0.489915	0.114709	0.635156
SAE1	20	169	-0.322537	0.00668137	-0.329218	0.0148226	0.635156
EMR3	20	169	-0.261196	0.0223713	-0.283567	0.0984238	0.635156
FGD1	16	173	-0.245936	0.00203649	-0.247973	0.0452345	0.635156
SLCO1C1	13	176	-0.242708	-0.0172169	-0.225491	0.0808415	0.635156
PKD2	40	149	-0.0805668	0.141929	-0.222495	0.0161431	0.635156
SSBP4	22	167	-0.105411	0.0906936	-0.196104	0.0168935	0.635156
IL12RB2	11	178	-0.110926	0.0804634	-0.19139	0.0990016	0.635156
CD38	40	149	-0.138472	0.0529044	-0.191377	0.000783663	0.635156
GAD2	44	145	-0.170999	0.0119239	-0.182923	0.00842091	0.635156
OPRD1	30	159	-0.079373	0.0916623	-0.171035	0.141291	0.635156
PARP8	24	165	-0.116988	0.0403785	-0.157367	0.0925869	0.635156
ALKBH2	15	174	-0.152013	-0.00204283	-0.14997	0.145797	0.635156
AGAP8	26	163	-0.098061	0.0483366	-0.146398	0.0506036	0.635156
POU3F3	10	179	-0.131127	0.0142751	-0.145402	0.0939075	0.635156
DUS2L	24	165	-0.130571	0.00654265	-0.137113	0.0898253	0.635156
EPHA1	17	172	-0.125321	0.00989024	-0.135211	0.108472	0.635156
PMS2P3	20	169	-0.0824858	0.0432445	-0.12573	0.184207	0.635156
LPCAT2	19	170	-0.143044	-0.0201966	-0.122847	0.0569617	0.635156
THRB	34	155	-0.0200612	0.0925777	-0.112639	0.145737	0.635156
FRS3	12	177	-0.120273	-0.0104812	-0.109792	0.142467	0.635156
SLC30A5	25	164	-0.0942844	0.00839198	-0.102676	0.212403	0.635156
NFIL3	18	171	-0.0723761	0.0087551	-0.0811312	0.287826	0.635156
ATP2A3	57	132	-0.0778216	-5.56172e-05	-0.077766	0.172961	0.635156
TPSB2	22	167	-0.0479998	0.0174652	-0.0654651	0.172574	0.635156
GATAD1	14	175	-0.0724734	-0.0145957	-0.0578777	0.296316	0.635156
KRT17	16	173	0.14737	0.0841818	0.0631885	0.651144	0.635156
PEX11B	2	187	-0.450751	0.034532	-0.485283	0.281887	0.637167
HRG	7	182	-0.437279	0.000500585	-0.437779	0.0158257	0.637167
ZCCHC2	77	112	-0.137241	0.0906995	-0.227941	0.00241304	0.637167
ARAP3	11	178	-0.138903	0.0471682	-0.186071	0.07693	0.637167
SFXN4	33	156	-0.1066	0.00386785	-0.110468	0.123314	0.637167
NAA15	48	141	-0.332874	0.0571026	-0.389976	0.00927253	0.639241
MTA2	9	180	-0.296262	0.0246514	-0.320913	0.00187649	0.639241
NDUFB11	20	169	-0.121047	0.0796576	-0.200705	0.21271	0.639241
NUP107	13	176	-0.220352	-0.0357121	-0.18464	0.0972645	0.639241
ATXN1	26	163	-0.174211	0.0056609	-0.179872	0.0203286	0.639241
VCX	23	165	-0.26758	0.0679121	-0.335492	0.00835159	0.641998
MKX	42	147	-0.152951	-0.00377417	-0.149177	0.0965561	0.641998
ADAMTS17	24	165	-0.0827342	-0.00725794	-0.0754763	0.242953	0.641998
RRH	44	145	-0.0533792	-0.00166729	-0.0517119	0.280473	0.641998
MORF4L1	16	173	-0.158705	0.0346915	-0.193397	0.122904	0.644818
RAB4A	8	181	-0.160681	0.0105682	-0.171249	0.128914	0.644818
DIS3	39	150	-0.0961419	0.064929	-0.161071	0.0828259	0.644818
NEDD8	40	149	0.0435714	0.0556567	-0.0120853	0.474755	0.644818
CHRM4	15	174	-0.316306	0.0149194	-0.331225	0.0700315	0.646469
P4HB	9	180	-0.248118	0.0731734	-0.321291	0.170678	0.646469
ABCC1	19	170	-0.221896	0.00402598	-0.225922	0.0440361	0.646469
BDH1	5	184	-0.124163	-0.0027237	-0.121439	0.284717	0.646469
GTF2F2	50	139	-0.0416631	-0.00129021	-0.0403729	0.351501	0.646469
TMED10	31	158	-0.0352396	-0.0396927	0.00445305	0.519567	0.646469
BTG2	6	183	-0.675571	-0.00515255	-0.670418	0.0984517	0.646963
ARCN1	32	157	-0.493073	-0.107395	-0.385677	0.0297251	0.646963
GTF3C4	10	179	-0.220166	0.0961127	-0.316279	0.0922312	0.646963
TARDBP	26	163	-0.269087	0.0214358	-0.290523	0.0300918	0.646963
RAB40B	10	179	-0.275044	0.0067219	-0.281766	0.168092	0.646963
RASEF	22	167	-0.147947	0.000639586	-0.148586	0.0715662	0.646963
POLD4	7	182	-0.0509366	0.0476671	-0.0986037	0.180217	0.646963
MCHR1	40	149	0.127267	0.117354	0.00991288	0.531539	0.646963
ODC1	11	178	-0.208212	-0.00764504	-0.200567	0.0470726	0.650598
C1S	18	171	-0.154948	0.0142533	-0.169201	0.156159	0.650598
IRX5	19	169	-0.136397	-0.0168383	-0.119559	0.121053	0.650598
NOVA2	17	172	-0.0446691	0.052191	-0.0968601	0.238416	0.655539
S100A13	4	185	-0.228571	0.0166734	-0.245244	0.127515	0.657469
B4GALT2	8	181	-0.180632	0.0486717	-0.229304	0.147532	0.657469
ZNF423	20	169	-0.177448	0.0487557	-0.226204	0.0377608	0.657469
IDH3A	17	172	-0.228128	-0.0147128	-0.213415	0.148276	0.657469
PCDHB14	11	178	-0.174058	0.0207371	-0.194795	0.0737077	0.657469
KCNA7	18	171	-0.023766	0.0767115	-0.100478	0.203816	0.657469
RPL5	19	170	-0.491662	-0.114429	-0.377234	0.0895531	0.65886
RFX5	2	187	-0.211141	0.0524236	-0.263565	0.244981	0.65886
ELOVL7	26	163	-0.197202	0.0550096	-0.252212	0.00929074	0.65886
PTGES	12	177	-0.173325	0.0519093	-0.225235	0.0948296	0.65886
EPHB3	6	183	-0.237191	-0.038298	-0.198893	0.255428	0.65886
CDX1	9	180	-0.0836236	0.0951883	-0.178812	0.091947	0.65886
HARS2	12	177	-0.0904326	0.0684675	-0.1589	0.137586	0.65886
OPHN1	11	178	-0.191363	0.0204011	-0.211765	0.197645	0.661556
BAX	19	170	-0.14736	0.0504131	-0.197773	0.0874976	0.661556
CYBA	32	157	-0.119183	0.0672545	-0.186437	0.103624	0.661556
CSNK1E	36	153	-0.135694	0.0123773	-0.148071	0.091831	0.661556
PPP1R7	28	161	-0.116034	-0.0162395	-0.0997941	0.275449	0.661556
TGIF2LY	185	4	0.017132	0.308348	-0.291216	0.183422	0.66433
SEZ6L2	18	171	-0.327461	-0.060771	-0.26669	0.0747197	0.66433
ZFP1	26	163	-0.144089	0.103898	-0.247987	0.0459606	0.66433
LILRA6	13	176	-0.134541	0.023813	-0.158354	0.0685223	0.66433
TNNI3K	14	175	-0.103466	0.0393942	-0.14286	0.197122	0.66433
XCL2	3	186	-0.441517	0.0783307	-0.519847	0.0787498	0.665346
AVIL	8	181	-0.319276	0.0496821	-0.368958	0.0305993	0.665346
ZNF222	13	176	-0.271513	0.0155634	-0.287076	0.0277756	0.665346
CAD	6	183	-0.216274	-0.0175514	-0.198722	0.285041	0.665346
PNKP	14	175	-0.169631	0.00253986	-0.172171	0.0225999	0.665346
CPNE2	19	170	-0.133872	-0.00356526	-0.130307	0.084579	0.665346
POR	20	169	-0.0514066	0.00759606	-0.0590027	0.236134	0.665346
PPP1CB	5	184	-0.326465	-0.0263254	-0.30014	0.0575196	0.667061
VKORC1	15	174	-0.214829	-0.0192332	-0.195596	0.0764561	0.667061
ALDH3B2	7	182	-0.14828	-0.00717971	-0.141101	0.141432	0.667061
ADAMTS3	37	152	-0.100317	0.0205127	-0.12083	0.0186843	0.667061
OR52B2	37	152	-0.0593307	0.00267415	-0.0620048	0.243947	0.667061
MAP1B	21	168	0.0207227	0.0385513	-0.0178285	0.436741	0.667061
OR8G5	33	156	-0.00118571	-0.012276	0.0110902	0.561544	0.667061
NCR1	11	178	-0.235099	0.0120321	-0.247131	0.0754432	0.670145
COMP	21	168	-0.209573	0.00871808	-0.218291	0.017495	0.670145
PLRG1	54	135	-0.0707042	0.115033	-0.185737	0.00809889	0.670145
MYLK4	29	160	-0.0592964	0.12158	-0.180876	0.057937	0.670145
PDCL	14	175	-0.237313	-0.0735561	-0.163757	0.171449	0.670145
PECR	17	172	-0.137064	0.024487	-0.16155	0.115662	0.670145
GRM5	35	154	-0.121874	0.0336457	-0.155519	0.0650396	0.670145
GOT2	20	169	-0.137227	0.00648743	-0.143714	0.0264847	0.670145
CGB1	18	171	-0.108699	0.0198624	-0.128562	0.125656	0.670145
ARHGAP39	14	175	-0.0253034	0.0828619	-0.108165	0.286762	0.670145
RSPO3	30	159	-0.141625	-0.0337073	-0.107918	0.175502	0.670145
MPST	39	150	-0.0797075	0.0132096	-0.092917	0.0457004	0.670145
SNAPC3	62	127	-0.113374	-0.0330317	-0.0803419	0.196158	0.670145
MAP3K1	28	161	-0.00835803	0.070623	-0.078981	0.190105	0.670145
DEFA1B	70	111	-0.012948	0.0633985	-0.0763464	0.134963	0.670145
SSH3	6	183	-0.220025	0.0131469	-0.233172	0.043564	0.673928
CTGF	29	160	-0.0444633	0.0741124	-0.118576	0.0873915	0.673928
SFTPB	6	183	-0.00456287	0.0257233	-0.0302862	0.464931	0.673928
ERH	33	156	0.0125705	-0.0688809	0.0814515	0.685793	0.673928
DHX8	15	174	-0.391065	0.0361888	-0.427253	0.0127785	0.674191
ZNF417	14	175	-0.180896	0.0865565	-0.267452	0.0450236	0.674191
ATP5F1	19	170	-0.245711	0.00840935	-0.25412	0.0143879	0.674191
PCDHB4	11	178	-0.245202	-0.000858797	-0.244343	0.099384	0.674191
KRT28	18	171	-0.157967	0.0855114	-0.243478	0.00558476	0.674191
ZNF790	9	180	-0.20012	-0.00440482	-0.195715	0.0823983	0.674191
DBNL	13	176	-0.17638	-0.0167348	-0.159646	0.0748209	0.674191
ACVR1C	13	176	-0.139094	0.0188824	-0.157976	0.0369336	0.674191
KLK1	16	173	-0.113724	0.00566632	-0.119391	0.122928	0.674191
ARAF	20	169	-0.0733469	0.0333055	-0.106652	0.0448429	0.674191
MED12	9	180	-0.654312	-0.077383	-0.576929	0.0487081	0.677545
RANBP2	9	180	-0.466868	-0.00401053	-0.462858	0.108973	0.677545
TMED2	14	175	-0.349805	0.0159145	-0.36572	0.143993	0.677545
HAGHL	20	169	-0.244268	0.0240919	-0.26836	0.0144694	0.677545
ACLY	18	171	-0.0893695	0.028415	-0.117784	0.236296	0.677545
ATP5O	26	163	-0.42207	0.0132033	-0.435274	0.0429913	0.679198
ADAMTS16	9	180	-0.225415	0.0056145	-0.231029	0.161466	0.679198
PROZ	41	148	-0.162544	0.0220858	-0.184629	0.13553	0.679198
NUP107	13	176	-0.0312673	0.143938	-0.175205	0.19209	0.679198
TGFBR3	22	167	-0.156194	0.0151274	-0.171321	0.0576534	0.679198
PRTFDC1	46	143	-0.0724835	0.0676224	-0.140106	0.0332961	0.679198
CACNA1B	12	177	-0.123442	0.0122538	-0.135696	0.221372	0.679198
PRB3	16	173	-0.104961	-0.00474882	-0.100213	0.242401	0.679198
SERPINB8	79	110	-0.00582276	0.276614	-0.282437	0.00228153	0.680358
FOXRED2	37	152	-0.232564	0.0142317	-0.246795	0.0309209	0.680358
MCM2	10	179	-0.291275	-0.0475465	-0.243728	0.264041	0.680358
STYK1	19	170	-0.188674	-0.00132226	-0.187352	0.0236258	0.680358
ZNF282	16	173	-0.10559	0.0497794	-0.155369	0.176384	0.680358
SLC7A10	9	180	-0.186738	-0.0522075	-0.13453	0.100391	0.680358
EPS8L3	19	170	-0.11277	0.00308139	-0.115852	0.149033	0.680358
LNPEP	20	169	-0.0495751	0.0080032	-0.0575783	0.21962	0.680358
MGAT4B	11	178	0.0146665	0.0656695	-0.051003	0.36861	0.680358
ZNF124	5	184	-0.359362	0.0682904	-0.427653	0.16416	0.68183
COPB2	7	182	-0.424625	-0.00936581	-0.415259	0.163624	0.68183
ZNF653	22	167	-0.255416	0.0894849	-0.344901	0.00470049	0.68183
ZNF514	6	183	-0.277963	0.0255658	-0.303529	0.0685889	0.68183
EIF2AK3	5	184	-0.265976	0.0357915	-0.301768	0.228654	0.68183
PCDHB3	11	178	-0.231642	0.0232799	-0.254922	0.0501297	0.68183
PEX3	32	157	-0.207577	0.0382534	-0.24583	0.163452	0.68183
EIF2C4	15	174	-0.172978	0.0611869	-0.234164	0.00576992	0.68183
NODAL	22	167	-0.129154	0.0844369	-0.213591	0.0296217	0.68183
NAMPT	21	168	-0.198363	-0.0124417	-0.185921	0.0430525	0.68183
GBA2	36	153	-0.127609	0.0518846	-0.179494	0.093911	0.68183
MFAP1	20	169	-0.167676	0.00937674	-0.177053	0.0750664	0.68183
SLC25A3	17	171	-0.131824	0.0320869	-0.163911	0.174553	0.68183
SUPT16H	38	151	-0.0692814	0.0757758	-0.145057	0.174823	0.68183
PCYOX1L	10	179	-0.0872413	0.0412216	-0.128463	0.0943849	0.68183
BHLHE41	8	181	-0.0707203	0.0322559	-0.102976	0.343772	0.68183
STON2	35	154	-0.0529889	0.0281643	-0.0811532	0.18468	0.68183
GFPT1	7	182	-0.0224247	0.0245253	-0.0469499	0.39982	0.68183
MAP2K5	7	182	-0.00778917	0.0151954	-0.0229846	0.462371	0.68183
FZD4	24	165	0.0331039	0.031339	0.00176495	0.504853	0.68183
OR5W2	11	178	-0.161781	0.0791802	-0.240961	0.0333408	0.68274
DUSP14	20	169	-0.121028	0.116168	-0.237196	0.106998	0.68274
EXD3	22	167	-0.192874	0.0323219	-0.225196	0.0168334	0.68274
HEYL	8	181	-0.17497	0.0141042	-0.189074	0.093435	0.68274
COL3A1	9	180	-0.119679	0.0422207	-0.1619	0.0636264	0.68274
AP1G1	23	166	-0.0702326	0.0609428	-0.131175	0.102412	0.68274
JMJD6	7	182	-0.0771525	0.0539434	-0.131096	0.271335	0.68274
AKR1C4	51	138	-0.0321331	0.0799791	-0.112112	0.110969	0.68274
RBM25	30	159	-0.0491233	0.0614362	-0.11056	0.189482	0.68274
ATP5F1	19	170	-0.108825	-0.00481737	-0.104008	0.209877	0.68274
HRH2	14	175	-0.247709	0.0987065	-0.346416	0.0284848	0.68492
MED7	11	178	-0.207926	0.0893422	-0.297269	0.0233771	0.68492
RACGAP1	15	174	-0.0721589	0.210445	-0.282604	0.0655259	0.68492
ROCK1	32	157	-0.131989	0.0620769	-0.194066	0.105448	0.68492
VPS29	18	171	-0.171299	-0.0307488	-0.14055	0.204837	0.68492
TMOD1	17	172	-0.0926388	-0.0348069	-0.0578319	0.274135	0.68492
ADAM9	45	144	-0.0380591	-0.0195738	-0.0184853	0.386567	0.68492
RBM17	52	137	-0.0492603	-0.135461	0.0862006	0.735437	0.68492
RAB6B	11	178	-0.361141	0.00637642	-0.367518	0.126993	0.685613
HSDL2	17	172	-0.348278	-0.027544	-0.320734	0.112883	0.685613
GCHFR	20	169	-0.26582	0.0516788	-0.317498	0.0129563	0.685613
TOMM40	14	175	-0.210634	0.103807	-0.314441	0.111405	0.685613
ZNF643	8	181	-0.174453	0.119223	-0.293676	0.0279477	0.685613
SRPK1	15	174	-0.266389	0.0216495	-0.288038	0.00717545	0.685613
NDUFB4	10	179	-0.260302	-0.0134505	-0.246852	0.147583	0.685613
DLL3	9	180	-0.198736	0.0442076	-0.242943	0.0847243	0.685613
PHB2	18	171	-0.218624	0.00368175	-0.222306	0.111507	0.685613
ABRA	9	180	-0.225339	-0.00335665	-0.221983	0.0268176	0.685613
ST8SIA1	19	170	-0.0780228	0.107445	-0.185468	0.132132	0.685613
PSMD1	20	169	-0.224465	-0.0604494	-0.164015	0.266377	0.685613
PI4K2A	30	159	-0.15252	-0.00409797	-0.148422	0.0184734	0.685613
S100G	20	168	-0.10806	0.0383599	-0.14642	0.104318	0.685613
LETM1	46	143	-0.076088	0.0699333	-0.146021	0.0965453	0.685613
ZNF462	13	176	-0.125789	0.0142759	-0.140065	0.122039	0.685613
CXCL12	29	160	-0.148934	-0.0299179	-0.119016	0.0763975	0.685613
BCORL1	5	184	-0.0903819	0.0153965	-0.105778	0.252696	0.685613
AKAP11	50	139	-0.118734	-0.0266475	-0.092086	0.169788	0.685613
WWP1	15	174	-0.0656995	0.0197522	-0.0854517	0.345019	0.685613
TRIM35	65	124	-0.0916384	-0.0181935	-0.0734449	0.210856	0.685613
DDX31	11	178	-0.0466588	0.0145556	-0.0612144	0.347133	0.685613
PCCB	31	158	-0.0271706	-0.0200301	-0.00714043	0.473993	0.685613
DNASE1L2	16	173	-0.290965	-0.00584318	-0.285122	0.194502	0.685879
PCGF2	19	170	-0.172232	0.04229	-0.214522	0.0263823	0.685879
AFM	38	151	-0.212979	-0.00786836	-0.20511	0.0397761	0.685879
WFDC6	5	184	-0.262392	-0.0640506	-0.198341	0.364382	0.685879
UBL4B	20	169	-0.14243	0.05557	-0.198	0.052124	0.685879
UBR1	20	169	-0.132057	0.0220858	-0.154143	0.0500607	0.685879
ARF4	46	143	-0.118864	0.0178229	-0.136686	0.116359	0.685879
CHRD	6	183	-0.0718805	0.0509847	-0.122865	0.149591	0.685879
HLA-DRB3	26	163	-0.153045	-0.03223	-0.120815	0.184859	0.685879
NGF	17	172	-0.0756001	0.0364855	-0.112086	0.225806	0.685879
HS3ST3A1	54	135	-0.0513059	0.0442579	-0.0955638	0.103768	0.685879
LSM1	48	141	-0.0383037	0.00266589	-0.0409696	0.284409	0.685879
ATF6	5	184	-0.367822	0.0063201	-0.374142	0.0399392	0.6902
A2ML1	20	169	-0.182393	0.00291557	-0.185308	0.0930542	0.6902
MKRN1	16	173	-0.103403	0.0357903	-0.139193	0.151546	0.6902
GATA4	72	117	-0.0796606	0.0409884	-0.120649	0.0778494	0.6902
PAQR9	7	182	-0.0796804	0.0210436	-0.100724	0.324867	0.6902
RBM8A	2	187	-0.514493	0.016336	-0.530829	0.185288	0.692386
ST6GAL2	8	181	-0.440785	-0.0383491	-0.402436	0.00981773	0.692386
SSX1	22	167	-0.242345	0.00694215	-0.249287	0.0120523	0.692386
KRT3	12	177	-0.16545	0.0516572	-0.217107	0.0509647	0.692386
RAPH1	17	172	-0.136987	0.0230634	-0.160051	0.20638	0.692386
NFYB	15	174	-0.18451	-0.0343466	-0.150164	0.0698055	0.692386
NCL	20	169	-0.0439534	0.0946631	-0.138617	0.274618	0.692386
ARL4C	22	167	-0.152797	-0.0182569	-0.13454	0.105068	0.692386
CACNA2D3	56	133	-0.0904547	0.0294298	-0.119885	0.0698593	0.692386
RPTOR	9	180	-0.425685	-0.0249221	-0.400763	0.0353639	0.697495
SENP3	63	126	-0.10898	0.0465745	-0.155554	0.0172224	0.697495
TSLP	22	167	-0.111019	-0.00146556	-0.109553	0.0473331	0.697495
SNTB1	5	184	-0.0278195	0.0587379	-0.0865574	0.382526	0.697495
CHAF1A	38	151	-0.358143	0.159931	-0.518074	0.00233798	0.700476
ERCC6L	8	181	-0.340189	0.0217874	-0.361976	0.0334523	0.700476
BCKDHA	13	176	-0.223038	0.0509623	-0.274	0.0318881	0.700476
IL17F	15	174	-0.246876	-0.0352442	-0.211632	0.0771536	0.700476
SOX8	20	169	-0.199976	-0.0163999	-0.183576	0.165944	0.700476
KIR2DS1	29	154	-0.0909706	0.0234253	-0.114396	0.0887949	0.700476
CHD8	38	151	-0.0519163	0.0101648	-0.0620811	0.233165	0.700476
PCDH9	59	130	-0.0484653	-0.00588056	-0.0425847	0.310188	0.700476
GPX7	11	178	-0.260685	0.0118347	-0.27252	0.0744721	0.70302
LILRA2	10	179	-0.259072	-0.0235246	-0.235547	0.137776	0.70302
CHID1	38	151	-0.154699	0.0514735	-0.206172	0.0206666	0.70302
STEAP3	14	175	-0.155167	0.0498251	-0.204992	0.062205	0.70302
SFTPC	63	126	-0.151155	0.00562967	-0.156785	0.0151207	0.70302
HBA2	21	168	-0.130392	0.0163951	-0.146787	0.0719314	0.70302
RPP38	53	136	-0.0466507	0.0780684	-0.124719	0.077737	0.70302
ADAMTS6	25	164	-0.0175914	0.0220164	-0.0396078	0.309495	0.70302
ALOX15	60	129	0.0658947	0.0345538	0.0313409	0.638563	0.70302
SUMO2	5	184	-0.463375	-0.00417059	-0.459204	0.156683	0.704024
TLX2	6	183	-0.374139	0.0570883	-0.431228	0.122804	0.704024
MLC1	42	147	-0.280447	0.115015	-0.395461	0.0284582	0.704024
GNS	9	180	-0.202389	0.100928	-0.303316	0.0440464	0.704024
DNTTIP2	19	170	-0.37153	-0.0747556	-0.296774	0.0659881	0.704024
P2RY10	7	182	-0.293849	-0.00210243	-0.291747	0.0652331	0.704024
FCGR2A	5	184	-0.245412	0.023392	-0.268804	0.171753	0.704024
AGXT2	4	185	-0.162355	0.00429329	-0.166648	0.201265	0.704024
TTC23	19	170	-0.204302	-0.0458885	-0.158413	0.181156	0.704024
PPIL4	36	153	-0.0589519	0.0561328	-0.115085	0.058112	0.704024
APC	22	167	-0.0950737	0.00115101	-0.0962247	0.116723	0.704024
CECR1	31	158	-0.0834725	0.0100194	-0.0934919	0.178874	0.704024
PYGO2	2	187	-0.532404	0.0906086	-0.623013	0.195814	0.706281
NCF4	41	148	-0.229031	0.0175494	-0.246581	0.0524803	0.706281
CHEK1	33	156	-0.215025	0.0203963	-0.235422	0.0334409	0.706281
GIPC1	20	169	-0.148892	0.065702	-0.214594	0.0324231	0.706281
PDCL3	8	181	-0.118074	0.0332378	-0.151312	0.186923	0.706281
ILKAP	27	162	-0.101008	0.0424604	-0.143468	0.172052	0.706281
POLG	17	172	-0.0687423	0.0511079	-0.11985	0.15738	0.706281
AGTPBP1	23	166	-0.0700987	0.0268742	-0.096973	0.18252	0.706281
AAK1	6	183	0.023529	0.0262603	-0.00273133	0.492395	0.706281
MTA3	7	182	0.0459581	0.0147014	0.0312567	0.556256	0.706281
PASD1	5	184	-0.422063	0.0946827	-0.516745	0.0557343	0.706858
MAP4K2	5	184	-0.373777	0.0325791	-0.406356	0.00749324	0.706858
SLC2A5	30	159	-0.190529	0.153178	-0.343707	0.0167213	0.706858
ERGIC2	7	182	-0.301583	0.0391594	-0.340742	0.0902055	0.706858
IL28A	9	180	-0.294996	0.0374645	-0.33246	0.0960064	0.706858
TMEM126B	21	168	-0.229233	0.00864321	-0.237876	0.0482495	0.706858
PIN1P1	12	177	-0.141155	0.0929894	-0.234144	0.107901	0.706858
FST	23	165	-0.194794	0.0216255	-0.216419	0.081614	0.706858
HOXA4	14	175	-0.216165	-0.00345079	-0.212715	0.0923744	0.706858
GPX3	10	179	-0.134195	0.0354569	-0.169652	0.213955	0.706858
CCNT2	12	177	-0.128376	0.0283107	-0.156687	0.107331	0.706858
IGLL1	28	161	-0.119083	0.0367252	-0.155808	0.0567773	0.706858
HBA1	21	168	-0.130392	0.0163951	-0.146787	0.0719314	0.706858
ZMIZ1	23	166	-0.195656	-0.0516047	-0.144051	0.165075	0.706858
MS4A8B	8	181	-0.100647	0.0428591	-0.143506	0.317101	0.706858
SLC26A3	21	168	-0.141991	-0.00808129	-0.13391	0.0690811	0.706858
GLYAT	13	176	-0.142436	-0.0088835	-0.133553	0.00487813	0.706858
MGAT4C	22	167	-0.140141	-0.00720604	-0.132935	0.0998666	0.706858
HNF1A	15	174	-0.0547129	0.0690395	-0.123752	0.146032	0.706858
MSX1	48	141	-0.144623	-0.02113	-0.123493	0.0606454	0.706858
ZNF286A	52	137	-0.088739	0.0257892	-0.114528	0.0457742	0.706858
ERBB4	62	127	-0.0396159	0.0674298	-0.107046	0.141743	0.706858
KAT8	15	174	-0.0946973	0.0086762	-0.103374	0.165572	0.706858
RMND5A	45	144	-0.102631	-0.00711385	-0.0955173	0.130053	0.706858
AGAP5	22	167	-0.0470531	0.00918951	-0.0562426	0.308522	0.706858
HS6ST3	45	144	0.00518856	0.0575619	-0.0523734	0.210463	0.706858
RPS6KL1	32	157	-0.0728952	-0.024727	-0.0481681	0.317547	0.706858
SMO	19	170	-0.0645783	-0.0171938	-0.0473845	0.28775	0.706858
DPF2	6	183	-0.418696	0.0574752	-0.476172	0.0315036	0.709016
GALR2	7	182	-0.297828	-0.00614683	-0.291681	0.0500634	0.709016
LPPR3	36	153	-0.140719	0.0321575	-0.172876	0.0172328	0.709016
ELAVL3	22	167	-0.153334	0.0181245	-0.171459	0.079672	0.709016
SULT1C2	9	180	-0.153522	0.011492	-0.165014	0.12517	0.709016
IRAK3	10	179	-0.112433	0.0481253	-0.160558	0.205152	0.709016
MEX3B	16	173	-0.181752	-0.0364068	-0.145345	0.11278	0.709016
NCOA4	28	161	-0.159617	-0.0345028	-0.125114	0.114859	0.709016
CD46	10	179	-0.129502	-0.0167549	-0.112747	0.165783	0.709016
RAB11FIP5	6	183	-0.110424	-0.0199658	-0.0904584	0.360104	0.709016
KLHL2	49	140	-0.0170507	-0.0253766	0.00832588	0.53651	0.709016
NAB1	9	180	-0.266184	0.0283858	-0.29457	0.163116	0.711323
DGCR6L	25	164	-0.271104	0.0171435	-0.288247	0.0573919	0.711323
SLC13A3	5	184	-0.275204	-4.68773e-06	-0.275199	0.177367	0.711323
ALG1	19	170	-0.180638	0.0538076	-0.234445	0.0452161	0.711323
WTAP	40	149	-0.103468	0.0705767	-0.174045	0.0175726	0.711323
RAG1	18	171	-0.156249	0.0108707	-0.16712	0.0744653	0.711323
NAA16	50	139	-0.112465	0.052284	-0.164749	0.0260809	0.711323
BCR	29	160	-0.0937712	0.0483436	-0.142115	0.0757327	0.711323
ZNF740	12	177	-0.00859495	0.118451	-0.127046	0.185098	0.711323
TPM2	36	153	-0.168303	-0.0453566	-0.122947	0.105272	0.711323
C11orf48	9	180	-0.100346	0.0132574	-0.113604	0.222389	0.711323
ABCB6	16	173	-0.157847	0.107354	-0.265201	0.0515526	0.71219
CDK11A	42	147	-0.091636	0.120658	-0.212294	0.0700801	0.71219
CCBP2	43	146	-0.166481	0.0154268	-0.181908	0.0127136	0.71219
CCL15	22	167	-0.143915	0.0186065	-0.162522	0.0518767	0.71219
CYP4F12	25	164	-0.131331	0.0233698	-0.154701	0.0958179	0.71219
SLC4A3	17	172	-0.115508	0.0269474	-0.142455	0.065214	0.71219
ZNF10	15	174	-0.0882118	0.0534305	-0.141642	0.0723561	0.71219
CALCR	14	175	-0.0967295	0.0267241	-0.123454	0.156501	0.71219
POLR2B	30	159	-0.198232	-0.0913328	-0.106899	0.180056	0.71219
ATP6V1E1	31	158	-0.0621432	0.0430874	-0.105231	0.0641416	0.71219
PTGFR	17	172	4.07372e-05	0.0628842	-0.0628434	0.316153	0.71219
ZNF76	15	174	-0.0147136	0.0351544	-0.049868	0.321974	0.71219
DUSP3	17	172	-0.039315	0.00256641	-0.0418814	0.440999	0.71219
MAGT1	6	183	0.101787	0.100742	0.00104506	0.501601	0.71219
LACTB	11	178	-0.214109	0.00130226	-0.215411	0.0804727	0.715871
FUT6	36	153	-0.182354	0.0260706	-0.208424	0.00354779	0.715871
ARHGAP17	18	171	-0.158703	0.0313029	-0.190006	0.0592267	0.715871
SLC24A3	20	169	-0.120387	0.0560246	-0.176412	0.025574	0.715871
HDAC10	43	146	-0.13758	0.0296834	-0.167263	0.0239181	0.715871
GRHL3	30	159	-0.128123	0.00932391	-0.137447	0.0693017	0.715871
LENG8	11	178	-0.117386	0.0189458	-0.136331	0.162644	0.715871
MED18	31	158	-0.100279	-0.00647147	-0.0938074	0.168428	0.715871
MMP25	17	172	-0.0229094	0.0384426	-0.061352	0.256213	0.715871
GHRH	7	182	-0.258227	0.0417413	-0.299968	0.107941	0.719705
NOX1	6	183	-0.283735	-0.0396518	-0.244083	0.189392	0.719705
DDI1	27	162	-0.137375	0.0735467	-0.210922	0.037512	0.719705
RNF144B	20	169	-0.12547	0.0458941	-0.171364	0.118009	0.719705
ZBTB39	10	179	-0.14871	0.0212133	-0.169923	0.141299	0.719705
HBG1	36	152	-0.0679363	0.0625158	-0.130452	0.018097	0.719705
KCNK7	5	184	-0.0531935	0.0240174	-0.0772109	0.349573	0.719705
ZNF688	17	172	-0.114139	-0.0402502	-0.0738892	0.206172	0.719705
LBP	8	181	0.00677678	0.0192532	-0.0124764	0.473539	0.719705
PPOX	3	186	-0.709342	0.0870049	-0.796347	0.0316842	0.722641
CAPN12	9	180	-0.193269	0.069241	-0.26251	0.0450459	0.722641
ZSCAN1	15	174	-0.20538	-0.011671	-0.193709	0.0603832	0.722641
PPAPDC2	58	131	-0.0731996	0.0815139	-0.154714	0.0674876	0.722641
HSD11B1	7	182	-0.156555	-0.0112169	-0.145338	0.249227	0.722641
KCNH3	15	174	-0.147035	-0.00898524	-0.13805	0.260484	0.722641
TNFRSF4	32	156	-0.142452	-0.0336676	-0.108784	0.19302	0.722641
CHEK2	37	152	-0.0893012	0.0145683	-0.10387	0.0909118	0.722641
PISD	34	155	-0.0643932	0.0392729	-0.103666	0.146383	0.722641
KLHL5	40	149	-0.0866536	0.0156727	-0.102326	0.0602644	0.722641
CD200R1	11	178	-0.0725039	-0.00630457	-0.0661993	0.31768	0.722641
CFD	35	153	-0.119769	0.116488	-0.236257	0.0103477	0.727322
MCHR2	32	157	-0.109137	0.0525345	-0.161671	0.0413956	0.727322
PSMB5	37	152	-0.075178	0.0814311	-0.156609	0.181146	0.727322
SSR1	23	166	-0.0828668	0.0462815	-0.129148	0.134995	0.727322
PPP1CC	18	171	-0.0846805	0.0402087	-0.124889	0.0788867	0.727322
PRSS42	44	145	-0.0656121	0.058532	-0.124144	0.101552	0.727322
KRT16	16	173	-0.124031	-0.0286729	-0.0953579	0.10639	0.727322
TAS2R4	17	172	-0.0743764	0.0187371	-0.0931136	0.178691	0.727322
RYK	9	180	-0.309171	0.0394098	-0.348581	0.0462258	0.729541
AP2A1	15	174	-0.285184	0.0231583	-0.308343	0.0728434	0.729541
YPEL2	8	181	-0.24579	0.0205555	-0.266345	0.145497	0.729541
SUDS3	16	173	-0.191327	0.0362665	-0.227593	0.113137	0.729541
UBA6	32	157	-0.159088	0.0512254	-0.210313	0.0407807	0.729541
SNRPA1	20	169	-0.172467	-0.00355801	-0.168909	0.0338079	0.729541
GPX1	44	145	-0.106454	0.0316677	-0.138121	0.126587	0.729541
PABPC4	9	180	-0.0853587	0.0417595	-0.127118	0.118175	0.729541
PPID	46	143	-0.0906479	0.0191446	-0.109793	0.0692271	0.729541
EML1	33	156	-0.0698414	0.0229811	-0.0928225	0.0822918	0.729541
ERCC2	22	167	-0.186087	-0.10302	-0.0830669	0.318743	0.729541
GIMAP7	16	173	-0.100137	-0.0195703	-0.0805669	0.249861	0.729541
TUBD1	7	182	-0.0266267	0.0286427	-0.0552693	0.313628	0.729541
TBX19	4	185	-0.510699	0.0148717	-0.525571	0.0668018	0.731424
TRIP4	10	179	-0.231871	0.0860901	-0.317961	0.133878	0.731424
GPR31	45	144	-0.244142	0.0661358	-0.310277	0.0325833	0.731424
MIOS	15	174	-0.253209	0.0154289	-0.268638	0.053534	0.731424
CD40	5	184	-0.198623	0.0386476	-0.23727	0.063857	0.731424
AGAP3	16	173	-0.232168	0.00103174	-0.2332	0.117974	0.731424
ZNF143	34	155	-0.181298	0.0191599	-0.200457	0.00956049	0.731424
GALK2	23	166	-0.166179	-0.00169494	-0.164484	0.057716	0.731424
PLA2R1	13	176	-0.100431	0.00824117	-0.108672	0.262482	0.731424
RHOJ	33	156	-0.0465427	0.00421174	-0.0507544	0.304997	0.731424
OLFML2B	3	186	0.154511	0.184999	-0.0304876	0.448774	0.731424
ZNF185	14	175	-0.0113161	0.0141308	-0.0254469	0.435334	0.731424
LCORL	38	151	0.0389715	0.0620865	-0.0231149	0.412371	0.731424
FXYD4	27	162	0.0635543	0.0859573	-0.022403	0.434799	0.731424
JTB	3	186	-0.315514	0.028682	-0.344196	0.141942	0.735055
MRPL19	6	183	-0.167072	0.0106378	-0.177709	0.281581	0.735055
MAN2C1	14	175	-0.119203	0.0563173	-0.17552	0.19806	0.735055
S1PR2	22	167	-0.153918	0.0120844	-0.166002	0.0537379	0.735055
BUD31	17	172	-0.151726	0.0134663	-0.165193	0.0931566	0.735055
DCBLD1	32	157	-0.146491	-0.0457408	-0.10075	0.164435	0.735055
ICOSLG	31	158	-0.01986	0.0688827	-0.0887427	0.196153	0.735055
VSIG10	17	172	-0.0542315	0.028861	-0.0830925	0.159966	0.735055
NEUROG3	22	167	-0.103403	-0.0266171	-0.0767862	0.290796	0.735055
HIATL1	17	172	-0.0454643	0.0280901	-0.0735544	0.288657	0.735055
USP3	11	178	-0.111505	-0.0460309	-0.0654743	0.336404	0.735055
ADRA1B	12	177	-0.304027	0.0556422	-0.359669	0.0589694	0.736807
MAST2	8	181	-0.295646	0.00833107	-0.303977	0.0804557	0.736807
PHF12	17	172	-0.278809	-0.0313317	-0.247477	0.080889	0.736807
KCNQ3	14	175	-0.148655	0.0532443	-0.201899	0.063766	0.736807
BIRC8	10	179	-0.0691959	0.0901846	-0.159381	0.290966	0.736807
VPS4B	77	112	-0.0882981	0.0624443	-0.150742	0.132468	0.736807
TCF20	36	153	-0.087294	0.0630138	-0.150308	0.0962921	0.736807
PTH1R	44	145	-0.0750307	0.0654497	-0.14048	0.0172001	0.736807
CUBN	53	135	-0.0173615	0.0998973	-0.117259	0.106269	0.736807
CACNA1D	48	141	-0.0621492	0.0384686	-0.100618	0.106369	0.736807
ZNF266	28	161	-0.112085	-0.0127994	-0.0992852	0.227708	0.736807
CTAGE1	31	158	-0.0916993	0.00055063	-0.0922499	0.108103	0.736807
TNFRSF13C	35	153	-0.0795969	-0.0050924	-0.0745045	0.0928463	0.736807
PTAFR	32	157	-0.0656091	0.0036125	-0.0692216	0.216653	0.736807
CLK2	2	187	0.0418305	0.0858405	-0.0440101	0.172456	0.736807
RAB25	2	187	-0.480213	0.0174298	-0.497643	0.0136559	0.737241
OR4C11	16	141	-0.219461	0.115298	-0.334759	0.0546133	0.737241
MORC3	27	162	-0.231122	0.0717613	-0.302884	0.0473449	0.737241
CAPNS1	9	180	-0.248132	0.0220242	-0.270157	0.0109795	0.737241
GPN1	5	184	-0.251203	0.0167549	-0.267958	0.312336	0.737241
BUB1B	22	167	-0.292725	-0.0315185	-0.261206	0.114678	0.737241
ZNFX1	4	185	-0.228939	0.0282045	-0.257143	0.145865	0.737241
KIAA0226	5	184	-0.244908	-0.0134131	-0.231495	0.167441	0.737241
KCNK17	13	176	-0.146333	0.08118	-0.227513	0.0216507	0.737241
BBS4	10	179	-0.115004	0.0663171	-0.181321	0.0918295	0.737241
GALE	30	159	-0.151816	0.0159524	-0.167768	0.0166341	0.737241
GATA6	31	158	-0.182604	-0.0268995	-0.155704	0.137005	0.737241
POLI	73	116	-0.0999811	0.0513381	-0.151319	0.0144855	0.737241
PLSCR3	62	127	-0.0977913	0.0529347	-0.150726	0.0295564	0.737241
TRPM8	22	167	-0.0782339	0.0592062	-0.13744	0.15845	0.737241
SIAH1	19	170	-0.0884704	0.0105476	-0.099018	0.219508	0.737241
G6PC3	17	172	-0.0798899	-0.0231993	-0.0566907	0.264963	0.737241
SLC22A18	36	153	-0.0569717	-0.00633176	-0.0506399	0.339183	0.737241
FEZ2	5	184	-0.396928	0.138177	-0.535105	0.0948394	0.74145
EIF2B4	5	184	-0.345475	0.0152435	-0.360718	0.210292	0.74145
HOXA2	14	175	-0.197428	0.00799895	-0.205427	0.141098	0.74145
GPR173	24	165	-0.161774	-0.00522517	-0.156549	0.0734701	0.74145
DDX27	4	185	-0.100116	0.0424411	-0.142558	0.379555	0.74145
DHRS11	22	167	-0.113015	0.0247814	-0.137797	0.102933	0.74145
DNMT1	22	167	-0.117099	0.00249032	-0.119589	0.176981	0.74145
SLC19A1	31	158	-0.09286	0.00183078	-0.0946908	0.121335	0.74145
OR10S1	32	157	-0.0536625	0.00714036	-0.0608029	0.216319	0.74145
KCNK16	13	176	-0.0517889	0.0056556	-0.0574445	0.353087	0.74145
ARSB	32	157	-0.00670162	0.0242374	-0.030939	0.375808	0.74145
SNAPIN	4	185	-0.574579	-0.00507164	-0.569507	0.0785563	0.74233
FIGF	23	165	-0.234106	0.00596975	-0.240076	0.0717728	0.74233
PPAN-P2RY11	22	167	-0.207515	0.0271553	-0.23467	0.0153682	0.74233
DAG1	44	145	-0.181826	0.048698	-0.230524	0.0192733	0.74233
RNF145	11	178	-0.130146	0.0313625	-0.161509	0.191287	0.74233
BACH2	29	160	-0.102423	0.053773	-0.156196	0.0860932	0.74233
HTR1E	31	158	-0.10999	0.0384537	-0.148444	0.0955607	0.74233
CASP5	29	160	-0.0917088	0.0509791	-0.142688	0.0801473	0.74233
AFG3L1P	30	159	-0.0942507	0.0366082	-0.130859	0.045186	0.74233
ZNF22	29	160	-0.104912	0.0242973	-0.12921	0.0879821	0.74233
NRD1	9	180	-0.0763873	0.0181578	-0.0945451	0.277487	0.74233
CD7	10	179	-0.091094	0.00199565	-0.0930897	0.27275	0.74233
GRIN2A	21	168	-0.0614883	0.0298489	-0.0913373	0.153739	0.74233
HIC2	38	151	-0.0677243	0.00985402	-0.0775783	0.101287	0.74233
ITGA9	41	148	-0.0525861	0.0148569	-0.067443	0.183056	0.74233
TPSAB1	22	167	-0.0479998	0.0174652	-0.0654651	0.172574	0.74233
TDRD9	35	154	-0.0342581	0.0274472	-0.0617053	0.279801	0.74233
RAD9A	7	182	-0.000727942	-0.0358912	0.0351633	0.584622	0.74233
WNT9A	7	182	-0.249849	0.117485	-0.367334	0.104928	0.745817
COASY	19	170	-0.32957	0.0292556	-0.358826	0.0185072	0.745817
TUBA1A	15	174	-0.309875	0.0015732	-0.311448	0.053921	0.745817
SH3BP5L	6	183	-0.333007	-0.0387765	-0.29423	0.182284	0.745817
PGS1	8	181	-0.300118	-0.00744823	-0.29267	0.14119	0.745817
DYRK1B	9	180	-0.196756	0.0916838	-0.28844	0.126483	0.745817
NOV	5	184	-0.261934	0.0117403	-0.273674	0.104581	0.745817
LENG1	9	180	-0.286275	-0.0195535	-0.266722	0.0855163	0.745817
SLC25A13	15	174	-0.289126	-0.0278397	-0.261287	0.0741335	0.745817
INMT	14	175	-0.2915	-0.0368215	-0.254679	0.112858	0.745817
UGCG	14	175	-0.224691	0.00504457	-0.229735	0.106659	0.745817
CRX	20	169	-0.224965	-0.00223395	-0.222731	0.0379226	0.745817
NDUFA6	36	153	-0.169595	0.0463853	-0.21598	0.0513096	0.745817
FLVCR1	7	182	-0.201015	-0.0134483	-0.187567	0.273586	0.745817
INPP4A	10	179	-0.135529	0.0506635	-0.186192	0.0505758	0.745817
KIR2DS2	29	154	-0.089851	0.0885075	-0.178358	0.123903	0.745817
CIR1	10	179	-0.0948352	0.0734892	-0.168324	0.178767	0.745817
CYP3A4	17	172	-0.110896	0.0359764	-0.146872	0.137329	0.745817
SCO1	54	135	-0.0939468	0.0486823	-0.142629	0.0617206	0.745817
SCN5A	42	147	-0.127147	0.0145116	-0.141658	0.0547716	0.745817
RASAL3	20	169	-0.132233	0.00374292	-0.135976	0.0775517	0.745817
YWHAB	5	184	-0.0706573	0.0574575	-0.128115	0.313968	0.745817
CPZ	47	142	-0.065667	0.0533476	-0.119015	0.111557	0.745817
AP2A1	15	174	-0.0886574	0.0192193	-0.107877	0.124601	0.745817
DNTT	28	161	-0.0775686	0.0273067	-0.104875	0.149159	0.745817
GDPD2	8	181	-0.0797761	0.0210662	-0.100842	0.313446	0.745817
IGF2R	40	149	-0.084166	0.0135753	-0.0977414	0.238992	0.745817
MGAT4C	22	167	-0.145134	-0.0583319	-0.0868024	0.285762	0.745817
CLCA3P	16	173	-0.0489272	0.0295099	-0.078437	0.221946	0.745817
KCNJ2	8	181	0.0207171	0.0986582	-0.0779411	0.353691	0.745817
IDO1	43	146	-0.0100507	0.0476207	-0.0576714	0.228194	0.745817
P2RX3	9	180	-0.00670088	0.0508344	-0.0575353	0.387244	0.745817
CDAN1	21	168	-0.0495309	-0.00349998	-0.0460309	0.281479	0.745817
DLEU2L	11	178	-0.0107261	0.0167829	-0.027509	0.417063	0.745817
UQCRQ	16	173	-0.336336	-0.0286931	-0.307643	0.0406619	0.748902
TRIM37	8	181	-0.283089	0.00712637	-0.290216	0.109918	0.748902
ZCCHC13	6	183	-0.263707	-0.0033631	-0.260344	0.0935204	0.748902
EIF3J	20	169	-0.308715	-0.0485197	-0.260196	0.063164	0.748902
ZNF500	17	172	-0.217682	-0.0140523	-0.20363	0.126938	0.748902
ZNF521	46	143	-0.164951	0.00951345	-0.174464	0.0415633	0.748902
STAT3	19	170	-0.142781	0.0235941	-0.166375	0.113664	0.748902
HPS1	30	159	-0.193048	-0.0306895	-0.162359	0.134526	0.748902
KLK13	16	173	-0.144771	-0.0130412	-0.13173	0.108678	0.748902
CLDN3	19	170	-0.0940288	0.0201803	-0.114209	0.0572393	0.748902
MBTPS1	32	157	-0.107407	0.00122743	-0.108635	0.0374988	0.748902
PARP12	19	170	-0.0730978	0.0348266	-0.107924	0.270613	0.748902
PHF3	18	171	-0.0684837	0.0327645	-0.101248	0.159954	0.748902
GMFB	30	159	-0.114461	-0.0434332	-0.0710276	0.232968	0.748902
KAT2B	32	157	0.097352	0.101921	-0.00456889	0.4833	0.748902
KCNE3	13	176	-0.272176	-0.0238306	-0.248345	0.102364	0.751247
POLR2J4	12	177	-0.27876	-0.0355683	-0.243192	0.169434	0.751247
P2RY11	22	167	-0.207515	0.0271553	-0.23467	0.0153682	0.751247
ACOT11	12	177	-0.153244	0.0788403	-0.232084	0.0397819	0.751247
RHOA	45	144	-0.128418	0.0607292	-0.189147	0.0698295	0.751247
PIR-FIGF	24	164	-0.150247	0.0266658	-0.176913	0.128507	0.751247
QSOX1	6	183	-0.147819	0.0138495	-0.161669	0.0435822	0.751247
ARHGAP10	54	135	-0.122557	0.0335131	-0.15607	0.0570267	0.751247
ECD	21	168	-0.1461	-0.0108309	-0.135269	0.171008	0.751247
TCEA1	17	172	-0.0269964	0.0891382	-0.116135	0.166527	0.751247
PFDN5	12	177	-0.114193	-0.0207576	-0.0934352	0.285665	0.751247
MIB1	29	160	-0.0815366	-0.0125204	-0.0690161	0.225077	0.751247
CITED2	33	156	-0.0492997	0.0157777	-0.0650774	0.140906	0.751247
DDX60	51	138	-0.0311616	0.0197358	-0.0508974	0.202295	0.751247
KISS1R	36	151	0.0283571	0.0733167	-0.0449596	0.32194	0.751247
INHA	17	172	0.0144304	0.0225598	-0.00812935	0.483228	0.751247
TLE1	21	168	0.0375205	0.0450996	-0.00757909	0.473453	0.751247
RALY	2	187	-0.869621	-0.000280004	-0.869341	0.210724	0.753364
PRPF38A	11	178	-0.621201	-0.101191	-0.520011	0.0174002	0.753364
ADSS	4	185	-0.352035	-0.0275372	-0.324498	0.162429	0.753364
OAZ1	37	152	-0.226476	0.0385564	-0.265033	0.00523097	0.753364
DHX37	17	172	-0.236402	0.0147034	-0.251105	0.0870467	0.753364
TRAPPC2P1	13	176	-0.213563	0.0323536	-0.245917	0.050937	0.753364
LARS	12	177	-0.236601	-0.00404667	-0.232554	0.130798	0.753364
CELF6	13	176	-0.166524	0.00648163	-0.173006	0.113523	0.753364
MTR	5	184	-0.155914	0.0141576	-0.170072	0.315437	0.753364
NPHP1	11	178	-0.118228	0.0391775	-0.157406	0.116049	0.753364
KIF15	45	144	-0.166412	-0.0260613	-0.140351	0.101041	0.753364
CDKL3	15	174	-0.0907764	0.0461368	-0.136913	0.193156	0.753364
MFSD11	8	181	-0.0664404	0.039495	-0.105935	0.296595	0.753364
CNTFR	35	154	-0.0502841	0.0536342	-0.103918	0.115866	0.753364
OR1E2	55	134	-0.122089	-0.0392183	-0.0828702	0.114999	0.753364
BTF3	19	170	-0.0934581	-0.0135246	-0.0799335	0.119831	0.753364
HNRNPD	43	146	-0.0233356	0.050756	-0.0740917	0.140103	0.753364
MBD3	39	150	-0.0173153	0.0037635	-0.0210788	0.399534	0.753364
PSMD4	2	187	-0.770564	-0.0373401	-0.733224	0.127067	0.754048
COPZ2	9	180	-0.642783	0.0444933	-0.687276	0.0195475	0.754048
CDH26	2	187	-0.455825	0.0651045	-0.520929	4.78377e-07	0.754048
ARIH1	13	176	-0.432305	-0.0146097	-0.417696	0.0693231	0.754048
ILF2	4	185	-0.340814	0.00782712	-0.348641	0.0549716	0.754048
EFNB1	8	181	-0.215063	0.105385	-0.320448	0.154487	0.754048
RPL23A	18	171	-0.40483	-0.0854569	-0.319373	0.0850553	0.754048
LBH	5	184	-0.298778	0.0195015	-0.318279	0.076482	0.754048
GMEB2	2	187	-0.369098	-0.0523582	-0.31674	0.339685	0.754048
COX7B	6	183	-0.35813	-0.0494449	-0.308685	0.0605865	0.754048
ABRA	9	180	-0.224807	0.0822271	-0.307034	0.0211893	0.754048
GUCY2F	5	184	-0.308778	-0.00683136	-0.301947	0.136585	0.754048
MAT2A	6	183	-0.303437	-0.00263574	-0.300801	0.190242	0.754048
TFB2M	5	184	-0.291994	0.00717842	-0.299173	0.14341	0.754048
BAZ1B	20	169	-0.280747	0.0142935	-0.29504	0.00412463	0.754048
MKI67IP	13	176	-0.24806	0.0402221	-0.288282	0.135855	0.754048
EID2	9	180	-0.252911	0.0325496	-0.28546	0.0770419	0.754048
GLE1	12	177	-0.273141	0.00946581	-0.282607	0.0615887	0.754048
PIK3CD	28	161	-0.242403	0.0311564	-0.273559	0.0664839	0.754048
KRT6A	12	177	-0.176556	0.0908857	-0.267442	0.150898	0.754048
GTF2H2B	15	173	-0.226472	0.040763	-0.267235	0.0163287	0.754048
CRYBB1	31	158	-0.209929	0.0486162	-0.258545	0.0663178	0.754048
GPI	9	180	-0.196539	0.0577602	-0.254299	0.0821323	0.754048
CD93	16	173	-0.252988	-0.0105868	-0.242401	0.107709	0.754048
KARS	26	163	-0.297855	-0.055547	-0.242308	0.145869	0.754048
CDK2	11	178	-0.320109	-0.0805955	-0.239514	0.213809	0.754048
CD1C	2	187	-0.231376	0.00791096	-0.239287	0.344887	0.754048
KCNJ10	3	186	-0.210094	0.0207346	-0.230829	0.211437	0.754048
CREG1	4	185	-0.212898	0.0177243	-0.230622	0.175039	0.754048
CELF5	39	150	-0.20043	0.0297986	-0.230228	0.0552063	0.754048
COL8A2	15	174	-0.116813	0.110735	-0.227549	0.0892144	0.754048
ZNF572	8	181	-0.132545	0.0936326	-0.226177	0.0714025	0.754048
RTF1	22	167	-0.301931	-0.0769572	-0.224973	0.0901517	0.754048
ISX	39	150	-0.232649	-0.00805351	-0.224596	0.0172885	0.754048
METTL2B	18	171	-0.187161	0.0361642	-0.223325	0.13478	0.754048
LEPRE1	7	182	-0.225777	-0.00468132	-0.221096	0.156831	0.754048
STK17A	14	175	-0.194648	0.0242814	-0.21893	0.14995	0.754048
ZNF10	15	174	-0.234205	-0.0170995	-0.217106	0.127147	0.754048
XRCC2	17	172	-0.2008	0.0130987	-0.213899	0.0924909	0.754048
NDUFS1	18	171	-0.292323	-0.0830109	-0.209312	0.208994	0.754048
CYP4F3	20	169	-0.0943818	0.111823	-0.206205	0.0612448	0.754048
ABCB4	15	174	-0.216372	-0.0110568	-0.205315	0.0823129	0.754048
MFN1	5	184	-0.179079	0.0255485	-0.204628	0.0608137	0.754048
NR1H2	15	174	-0.183247	0.0196999	-0.202947	0.0196341	0.754048
HIST3H2A	8	181	-0.179455	0.0205658	-0.200021	0.263664	0.754048
PNPT1	9	180	-0.188683	0.00782655	-0.196509	0.137786	0.754048
TNNI2	36	153	-0.138495	0.051566	-0.190061	0.0299306	0.754048
RPP38	53	136	-0.204445	-0.0168153	-0.18763	0.148859	0.754048
POLE2	33	156	-0.202367	-0.0174329	-0.184934	0.074883	0.754048
SACM1L	45	144	-0.180433	0.000264374	-0.180698	0.049148	0.754048
LOC100133050	21	168	-0.16439	0.0150281	-0.179418	0.124233	0.754048
GYG1	5	184	-0.163335	0.0102874	-0.173622	0.268404	0.754048
YEATS4	13	176	-0.137679	0.0356972	-0.173376	0.212844	0.754048
SHC1	2	187	-0.188346	-0.0156552	-0.17269	0.247193	0.754048
SERHL	33	156	-0.0956396	0.0769947	-0.172634	0.0551503	0.754048
GALNT5	14	175	-0.14283	0.0297748	-0.172605	0.0207175	0.754048
THOP1	37	152	-0.19989	-0.0285989	-0.171291	0.00655662	0.754048
CLIC6	26	163	-0.100378	0.0703775	-0.170755	0.100827	0.754048
ASRGL1	8	181	-0.170494	-0.00146954	-0.169025	0.0350057	0.754048
CHRNA9	38	151	-0.0776105	0.0858931	-0.163504	0.115008	0.754048
SHMT1	46	143	-0.125011	0.0379881	-0.162999	0.0570514	0.754048
HIBCH	9	180	-0.128042	0.0347854	-0.162828	0.113933	0.754048
NXNL1	22	167	-0.0925476	0.0699638	-0.162511	0.068888	0.754048
CD36	16	173	-0.126522	0.0358838	-0.162406	0.0240443	0.754048
RPS7	9	180	-0.358274	-0.197126	-0.161147	0.305839	0.754048
MSRA	76	113	-0.116239	0.0446186	-0.160858	0.00082288	0.754048
PDP1	12	177	-0.138053	0.0227864	-0.16084	0.099904	0.754048
BAG2	13	175	-0.140945	0.0188509	-0.159796	0.0470185	0.754048
WFDC12	5	184	-0.217595	-0.0581638	-0.159432	0.269054	0.754048
SF1	5	184	-0.193537	-0.03442	-0.159117	0.283169	0.754048
KITLG	19	170	-0.14751	0.0105149	-0.158024	0.174149	0.754048
NT5E	30	159	-0.10468	0.0530435	-0.157723	0.199833	0.754048
PCDH15	28	161	-0.0861791	0.0697846	-0.155964	0.122269	0.754048
SLC37A4	32	157	-0.162987	-0.00728444	-0.155703	0.0329713	0.754048
HIPK4	10	179	-0.155835	-0.00122513	-0.15461	0.0606422	0.754048
ATP5C1	55	134	-0.167743	-0.0147841	-0.152959	0.105281	0.754048
RAB6C	13	176	-0.161674	-0.0112983	-0.150376	0.106973	0.754048
RAB34	18	171	-0.120223	0.0301311	-0.150354	0.103796	0.754048
DNA2	23	166	-0.0565897	0.0922116	-0.148801	0.126703	0.754048
LRRC2	44	145	-0.0921623	0.0561745	-0.148337	0.0648555	0.754048
TBC1D8	9	180	-0.107107	0.0408059	-0.147913	0.0946811	0.754048
RAP2B	5	184	-0.158102	-0.0111279	-0.146974	0.225886	0.754048
TNFRSF1A	18	171	-0.0855921	0.0605532	-0.146145	0.171681	0.754048
KATNB1	20	169	-0.156598	-0.011915	-0.144683	0.205504	0.754048
MTMR8	6	183	-0.0840497	0.0550799	-0.13913	0.306404	0.754048
LPAR1	15	174	-0.151327	-0.0126478	-0.138679	0.140849	0.754048
PIPSL	28	161	-0.113892	0.0245604	-0.138452	0.0787806	0.754048
B4GALT7	10	179	-0.0624641	0.0711512	-0.133615	0.190094	0.754048
CTSL1	24	165	-0.0843608	0.049239	-0.1336	0.0700328	0.754048
COG3	50	139	-0.11456	0.0156443	-0.130204	0.0625113	0.754048
KLF14	19	170	-0.140948	-0.0109303	-0.130018	0.163946	0.754048
GPR133	21	168	-0.125119	0.00477878	-0.129898	0.0812895	0.754048
BAI1	11	178	-0.0954128	0.0323632	-0.127776	0.227855	0.754048
NDUFB3	14	175	-0.0858632	0.0411982	-0.127061	0.162227	0.754048
GPR179	17	172	-0.0860736	0.0395223	-0.125596	0.162911	0.754048
RCN1	21	168	-0.122119	0.00324851	-0.125367	0.210731	0.754048
GZMM	38	151	-0.0862576	0.0381032	-0.124361	0.0960528	0.754048
KCNJ11	29	160	-0.104963	0.018191	-0.123154	0.129859	0.754048
ALKBH3	21	168	-0.100631	0.0220664	-0.122698	0.066933	0.754048
INS-IGF2	36	153	-0.127356	-0.00560272	-0.121754	0.046042	0.754048
TAS2R10	18	171	-0.108437	0.0130524	-0.121489	0.149356	0.754048
LUC7L2	16	173	-0.106771	0.0136206	-0.120392	0.220749	0.754048
CDK12	18	171	-0.0457761	0.0744803	-0.120256	0.20456	0.754048
PFKFB4	45	144	-0.107836	0.0120095	-0.119845	0.133422	0.754048
CAMKK2	15	174	-0.105949	0.0126013	-0.11855	0.133369	0.754048
SAFB	38	151	-0.0763085	0.0417915	-0.1181	0.156589	0.754048
KCNA1	18	171	-0.113527	0.0016507	-0.115177	0.172173	0.754048
FGF23	18	171	-0.128143	-0.0140039	-0.114139	0.227372	0.754048
MAN1A1	39	150	-0.0605866	0.0533192	-0.113906	0.144388	0.754048
CDK6	15	174	-0.174866	-0.0623087	-0.112557	0.306788	0.754048
NR1H3	13	176	-0.129816	-0.0179852	-0.111831	0.22391	0.754048
MPPE1	29	160	-0.0950988	0.0135247	-0.108623	0.225792	0.754048
DNAI1	34	155	-0.0941687	0.012832	-0.107001	0.129252	0.754048
MYOD1	28	161	-0.0551434	0.0479607	-0.103104	0.120697	0.754048
MAGI3	18	171	-0.0568839	0.0449947	-0.101879	0.201368	0.754048
DEFB4B	73	116	-0.0378194	0.0625591	-0.100378	0.110522	0.754048
THNSL1	46	143	-0.0998099	-0.00359993	-0.09621	0.153466	0.754048
ZNF484	17	172	-0.115664	-0.0195046	-0.0961597	0.223958	0.754048
MED20	12	177	-0.0315069	0.0638147	-0.0953216	0.324974	0.754048
HMOX2	18	171	-0.0738998	0.020905	-0.0948048	0.223699	0.754048
HAS2	6	183	-0.0474808	0.0468869	-0.0943677	0.274385	0.754048
ELOVL4	26	163	-0.0954558	-0.00203484	-0.093421	0.190391	0.754048
CSNK1A1L	48	141	0.0319841	0.123258	-0.0912739	0.210728	0.754048
HIST1H3C	18	171	-0.0772759	0.0136196	-0.0908955	0.293667	0.754048
GUCY1B2	48	141	-0.0285548	0.0623359	-0.0908908	0.159098	0.754048
CYP19A1	20	169	-0.102052	-0.0116394	-0.0904122	0.219107	0.754048
ARL3	29	160	-0.0604354	0.0292021	-0.0896375	0.203983	0.754048
ZNF678	10	179	-0.0657911	0.0215451	-0.0873361	0.306495	0.754048
PCSK1	20	169	-0.0915213	-0.00609469	-0.0854267	0.135951	0.754048
TAS2R38	17	172	-0.10195	-0.016568	-0.085382	0.163799	0.754048
ZSCAN4	13	176	-0.0828947	0.00183819	-0.0847329	0.220787	0.754048
PGC	12	177	-0.0572005	0.0267075	-0.083908	0.222097	0.754048
SH2D1A	5	184	-0.124298	-0.0427292	-0.0815685	0.344038	0.754048
MXRA5	23	166	-0.0549247	0.0254857	-0.0804104	0.294986	0.754048
RBMX	5	184	-0.11721	-0.0379614	-0.0792487	0.37411	0.754048
SPIB	15	174	-0.0876422	-0.00899366	-0.0786485	0.228612	0.754048
DEFA1	70	111	-0.012948	0.0633985	-0.0763464	0.134963	0.754048
RAB20	40	149	-0.075802	-0.000195999	-0.075606	0.138066	0.754048
AKAP4	22	167	-0.063904	0.00918228	-0.0730862	0.232441	0.754048
GPR110	17	172	-0.0353654	0.0366084	-0.0719738	0.211989	0.754048
TRIML1	52	137	-0.016773	0.0545338	-0.0713068	0.151681	0.754048
PROKR2	19	170	-0.0614223	0.00864672	-0.070069	0.216203	0.754048
B3GALT6	32	157	0.0444287	0.11348	-0.0690517	0.334206	0.754048
MNT	55	134	-0.0618775	0.00488453	-0.066762	0.218554	0.754048
PLK3	7	182	-0.079914	-0.0145663	-0.0653477	0.284494	0.754048
PLA2G2A	30	159	-0.0657878	-0.00274055	-0.0630472	0.254477	0.754048
RC3H2	14	175	-0.0459114	0.0158386	-0.06175	0.349526	0.754048
OR1E2	55	134	-0.0234447	0.0376045	-0.0610492	0.221781	0.754048
TWIST1	15	174	-0.0619414	-0.00187033	-0.0600711	0.242131	0.754048
OR10A4	38	151	0.0133348	0.0717979	-0.058463	0.285429	0.754048
THOC6	17	172	-0.0585578	-0.000178942	-0.0583789	0.339028	0.754048
ACHE	18	171	-0.0732171	-0.0163267	-0.0568904	0.341734	0.754048
HTR1F	25	164	-0.023692	0.0308714	-0.0545634	0.253117	0.754048
SEC22C	43	146	-0.0221847	0.0283212	-0.0505059	0.298972	0.754048
RAB5C	19	170	-0.0579214	-0.00805858	-0.0498629	0.388701	0.754048
ABCG4	32	157	-0.116367	-0.0666001	-0.0497672	0.326635	0.754048
IFNA4	80	109	0.013176	0.0604197	-0.0472437	0.222516	0.754048
ATP6V1B2	63	126	-0.0208144	0.0236764	-0.0444909	0.306372	0.754048
FBXL5	41	148	-0.0275934	0.0146815	-0.0422749	0.323088	0.754048
GATA1	21	168	-0.059679	-0.0175304	-0.0421486	0.349627	0.754048
IRAK1BP1	26	163	-0.00647322	0.0340633	-0.0405365	0.308853	0.754048
IGFBP2	17	172	-0.0985285	-0.0581054	-0.0404231	0.384358	0.754048
POLK	19	170	-0.0185839	0.0212459	-0.0398298	0.318819	0.754048
HSPA2	34	155	-0.0325692	0.00708027	-0.0396495	0.317709	0.754048
ARRB1	15	174	-0.0468362	-0.00798102	-0.0388551	0.326787	0.754048
ZNF137P	11	178	-0.0107903	0.0211683	-0.0319586	0.389459	0.754048
RAI1	46	143	-0.0354957	-0.00494166	-0.030554	0.332549	0.754048
MAPK15	11	178	-0.0189922	0.00372049	-0.0227127	0.431323	0.754048
OR4D1	8	181	-0.000356668	0.0202574	-0.0206141	0.433462	0.754048
SEC23A	33	156	0.00954516	0.0221735	-0.0126283	0.455882	0.754048
KCNH8	31	158	-0.0252444	-0.0154384	-0.00980599	0.456907	0.754048
AP1S3	17	172	0.0131828	0.0188149	-0.00563209	0.482828	0.754048
SOCS5	10	179	0.0461935	0.026245	0.0199484	0.564383	0.754048
SOX4	19	170	-0.011441	-0.0319604	0.0205195	0.57598	0.754048
IGFBP5	17	172	-0.00394456	-0.0415131	0.0375685	0.584704	0.754048
ITGB4	7	182	-0.225924	0.143726	-0.36965	0.00174962	0.758127
FTH1	8	181	-0.3421	0.0114975	-0.353598	0.104636	0.758127
ANP32B	17	172	-0.251825	0.0682035	-0.320029	0.0129953	0.758127
SGIP1	11	178	-0.243244	0.0329936	-0.276237	0.0174042	0.758127
RAD17	25	164	-0.163821	0.108501	-0.272322	0.0601397	0.758127
GUCY1A2	30	159	-0.217242	0.018095	-0.235337	0.0453703	0.758127
MAST3	23	166	-0.204141	-0.0117139	-0.192427	0.0333472	0.758127
NDOR1	10	179	-0.130861	0.0477193	-0.17858	0.178406	0.758127
CATSPER3	15	174	-0.163129	0.0113476	-0.174477	0.159818	0.758127
HHEX	28	161	-0.15557	-0.0223348	-0.133235	0.0869016	0.758127
UGT1A6	22	167	-0.103145	0.024375	-0.12752	0.100559	0.758127
APOBEC3F	34	154	-0.14543	-0.0215066	-0.123924	0.146061	0.758127
HIST1H3J	18	171	-0.0568344	0.0498029	-0.106637	0.232866	0.758127
ZIK1	13	176	-0.0758025	0.0253406	-0.101143	0.190257	0.758127
CACNG3	18	171	-0.0750028	0.0212741	-0.0962769	0.210198	0.758127
ATRNL1	34	155	-0.0835764	-0.00215732	-0.0814191	0.066664	0.758127
TIMP3	35	154	-0.0351618	-0.0104494	-0.0247124	0.399415	0.758127
MAPK8IP3	21	168	-0.0450249	-0.0288094	-0.0162155	0.442497	0.758127
PAPSS2	33	156	0.0914463	0.053607	0.0378393	0.628849	0.758127
LEFTY1	6	183	-0.339091	-0.0285235	-0.310567	0.114315	0.762521
LEFTY2	6	183	-0.279099	0.0244492	-0.303548	0.117988	0.762521
OR1N2	14	175	-0.232668	0.0366871	-0.269355	0.225028	0.762521
SLCO1B1	14	175	-0.181253	0.0107087	-0.191962	0.116001	0.762521
ZFP112	15	174	-0.169322	0.00822101	-0.177543	0.1109	0.762521
NDUFAB1	19	170	-0.0856168	0.071356	-0.156973	0.231633	0.762521
FOXO3	35	154	-0.0814587	0.0606975	-0.142156	0.097311	0.762521
ARF1	7	182	-0.138616	-0.00457074	-0.134046	0.266908	0.762521
TAT	24	165	-0.135329	-0.0148697	-0.12046	0.113387	0.762521
ZNF695	6	183	-0.0784498	0.0363043	-0.114754	0.270062	0.762521
CCL3	23	166	-0.0813277	0.0279176	-0.109245	0.173427	0.762521
MCTS1	6	183	-0.0381795	0.0587231	-0.0969026	0.292728	0.762521
JUP	17	172	-0.0732774	0.0212822	-0.0945596	0.177445	0.762521
ZNF85	22	167	-0.0953017	-0.00605906	-0.0892426	0.145029	0.762521
PCSK9	11	178	-0.0080651	0.0788727	-0.0869378	0.302069	0.762521
SP110	21	168	-0.06211	0.0174752	-0.0795852	0.23001	0.762521
TRPV1	56	133	-0.0406729	0.0359114	-0.0765843	0.188343	0.762521
FOXO3B	48	141	-0.00153444	0.0465958	-0.0481302	0.334611	0.762521
LYL1	21	167	-0.0213383	-0.0414743	0.020136	0.557383	0.762521
NHP2L1	35	154	-0.395285	-0.0415932	-0.353692	0.0489368	0.767242
SOD1	27	162	-0.201479	0.0663851	-0.267864	0.0291709	0.767242
IDS	5	184	-0.252222	0.00990625	-0.262128	0.148672	0.767242
GZMA	23	166	-0.19121	-0.00907285	-0.182137	0.0810468	0.767242
ABCA6	8	181	-0.18868	-0.012223	-0.176457	0.116246	0.767242
SNURF	18	171	-0.210388	-0.0448681	-0.16552	0.190488	0.767242
CWF19L1	29	160	-0.0838519	0.0553422	-0.139194	0.0915151	0.767242
VLDLR	57	132	-0.0965981	0.0377906	-0.134389	0.0588242	0.767242
RERG	17	172	0.0636789	0.196248	-0.132569	0.300199	0.767242
HTR1F	25	164	-0.0623854	0.0616126	-0.123998	0.156349	0.767242
PPP2R2A	64	125	-0.0143125	0.109372	-0.123684	0.150549	0.767242
PTCH1	20	169	-0.107395	0.0154174	-0.122812	0.0982462	0.767242
PAX6	21	168	-0.0981816	0.0176661	-0.115848	0.0770469	0.767242
NCAPD2	18	171	-0.147819	-0.0504113	-0.0974078	0.200756	0.767242
P2RX7	16	173	-0.0546644	0.038443	-0.0931074	0.300171	0.767242
SPI1	14	175	-0.0993603	-0.0162314	-0.0831289	0.325525	0.767242
HIF1AN	29	160	-0.0416733	0.0196158	-0.0612891	0.240049	0.767242
CPA6	26	163	-0.0192602	0.0387792	-0.0580394	0.360364	0.767242
HIST1H4E	20	169	-0.0225381	0.0286585	-0.0511966	0.279461	0.767242
DUSP23	3	186	-0.496318	0.0464853	-0.542803	0.288627	0.770602
HCCS	22	166	-0.39404	-0.0302721	-0.363768	0.0385727	0.770602
TPK1	16	173	-0.184285	0.082136	-0.266421	0.0722309	0.770602
PRRG3	3	186	-0.234471	-0.00101579	-0.233455	0.209576	0.770602
MYL10	18	171	-0.221695	0.00896017	-0.230655	0.0592376	0.770602
VTI1A	34	155	-0.138127	0.0458149	-0.183942	0.0206674	0.770602
BAP1	45	144	-0.119316	0.0385744	-0.15789	0.0899147	0.770602
COX6B2	11	178	-0.140532	0.0116772	-0.152209	0.16568	0.770602
TK1	8	181	-0.153465	-0.00231108	-0.151154	0.0946295	0.770602
STAC3	10	179	-0.147475	-0.00936105	-0.138114	0.271188	0.770602
TRAIP	44	145	-0.0750721	0.0379645	-0.113037	0.0962197	0.770602
DEAF1	39	150	-0.0611299	0.039249	-0.100379	0.104315	0.770602
HNRPLL	6	183	-0.044801	0.0549061	-0.0997071	0.385355	0.770602
ZNF662	43	146	-0.0803424	0.0183671	-0.0987095	0.154378	0.770602
ATP6V1B1	6	183	-0.0301564	0.0648247	-0.0949811	0.362601	0.770602
MED15	25	164	-0.0796429	0.00873432	-0.0883772	0.315525	0.770602
ITGB3BP	11	178	-0.077839	0.0066499	-0.0844889	0.290621	0.770602
DHX33	59	130	-0.0411619	0.0236383	-0.0648003	0.10472	0.770602
RPL37	5	184	-0.134556	-0.0844274	-0.0501285	0.429948	0.770602
CBL	33	156	-0.0495431	-0.0129505	-0.0365925	0.287337	0.770602
SLC41A2	18	171	-0.0317039	0.00157723	-0.0332812	0.393973	0.770602
METTL14	40	149	0.090446	0.121157	-0.0307112	0.415421	0.770602
DOT1L	36	153	0.0358026	0.0431696	-0.00736699	0.473466	0.770602
NLRP3	6	183	-0.262604	0.104023	-0.366628	0.0882946	0.771398
PSMC4	9	180	-0.374532	-0.0214222	-0.35311	0.0959116	0.771398
APLP1	8	181	-0.35802	-0.0216273	-0.336392	0.0741191	0.771398
ACSS2	2	187	-0.210984	0.0858767	-0.296861	0.361909	0.771398
OR10J1	3	186	-0.2329	0.0482789	-0.281178	0.141627	0.771398
PHPT1	9	180	-0.205512	0.00957742	-0.21509	0.115387	0.771398
SLIT2	44	145	-0.135124	0.0614177	-0.196542	0.0610953	0.771398
GLS	9	180	-0.160984	0.0247504	-0.185734	0.104877	0.771398
CKB	33	156	-0.152594	0.02763	-0.180224	0.0451479	0.771398
DNASE2B	16	173	-0.143224	0.0153478	-0.158572	0.134275	0.771398
PPP2R4	12	177	-0.113109	0.0357768	-0.148886	0.220857	0.771398
CCKAR	39	150	-0.285371	-0.150896	-0.134475	0.208635	0.771398
ETFDH	46	143	-0.116601	0.0130731	-0.129674	0.0796539	0.771398
RNF146	30	159	-0.1698	-0.0411848	-0.128615	0.077636	0.771398
SLC25A17	40	149	-0.0858028	0.0396578	-0.125461	0.0634141	0.771398
KAT8	15	174	-0.191792	-0.0714504	-0.120342	0.241582	0.771398
DCTN4	9	180	-0.120118	-0.000248221	-0.119869	0.258012	0.771398
SLC1A4	7	182	-0.0762935	0.037494	-0.113788	0.260269	0.771398
SERPINE2	18	171	-0.141986	-0.0462093	-0.0957766	0.282038	0.771398
ADCY5	11	178	-0.0681674	0.023251	-0.0914185	0.264911	0.771398
ADI1	8	181	-0.093734	-0.00312	-0.090614	0.268456	0.771398
RAB2B	38	151	-0.0219837	0.0661242	-0.0881079	0.159862	0.771398
UGT1A10	22	167	-0.0756715	0.0060068	-0.0816783	0.207743	0.771398
OR1E1	55	134	-0.0376336	0.008064	-0.0456976	0.201544	0.771398
TMEM14C	23	166	-0.0320209	0.00682834	-0.0388492	0.332258	0.771398
HERPUD1	19	170	-0.0228189	0.00628772	-0.0291067	0.408251	0.771398
DDX24	35	154	-0.0242151	0.00317633	-0.0273914	0.360949	0.771398
SARDH	11	178	-0.0765087	-0.0530756	-0.023433	0.470701	0.771398
MFNG	39	150	-0.0486325	-0.0313579	-0.0172746	0.427643	0.771398
ZNF585B	9	180	0.0724794	0.0341736	0.0383058	0.573577	0.771398
CACNG7	9	180	-0.439552	0.00937789	-0.44893	0.0513552	0.77802
IL12A	3	186	-0.405405	-0.0180937	-0.387311	0.170755	0.77802
ARL1	14	175	-0.158803	0.0295286	-0.188332	0.0273862	0.77802
YWHAG	19	170	-0.110725	0.0750165	-0.185741	0.0621314	0.77802
USP33	14	175	-0.144603	-0.0178797	-0.126723	0.152903	0.77802
CYP17A1	30	159	-0.10247	0.0234709	-0.125941	0.0450259	0.77802
EXOSC5	13	176	-0.139528	-0.0140082	-0.12552	0.208642	0.77802
GRIK4	37	152	-0.0593924	0.0646455	-0.124038	0.135392	0.77802
USP18	31	158	-0.161465	-0.044457	-0.117008	0.152778	0.77802
SULT1A1	17	172	-0.113946	-0.0125863	-0.101359	0.161045	0.77802
ZNF780A	9	180	-0.0532058	0.0415237	-0.0947295	0.229992	0.77802
PLXNA2	8	181	-0.111004	-0.0260288	-0.0849755	0.275434	0.77802
CLEC4D	19	170	-0.0487165	0.0279231	-0.0766396	0.156389	0.77802
ANAPC10	51	138	-0.0169194	0.0271873	-0.0441067	0.311938	0.77802
CXCR2	16	173	-0.0564532	-0.0267768	-0.0296765	0.409807	0.77802
TRPM6	21	168	0.035599	0.0153111	0.0202879	0.559535	0.77802
OR10R2	3	186	0.114847	-0.0682896	0.183136	0.973468	0.77802
CCNDBP1	20	169	-0.163808	0.136007	-0.299815	0.0443864	0.78128
CTTN	9	180	-0.235139	0.0174439	-0.252582	0.144133	0.78128
PITX3	30	159	-0.146724	0.0899831	-0.236707	0.0650202	0.78128
AFMID	8	181	-0.228615	-0.0123889	-0.216226	0.0692565	0.78128
ATAD2B	10	179	-0.202926	-0.0082895	-0.194637	0.285502	0.78128
HRAS	37	151	-0.115719	0.0467879	-0.162507	0.0311616	0.78128
PITX1	15	174	-0.143334	0.00935955	-0.152693	0.0869813	0.78128
SYT9	40	149	-0.141067	0.000840739	-0.141908	0.174004	0.78128
EIF2C2	15	174	-0.150433	-0.00996277	-0.140471	0.0805003	0.78128
NDRG1	13	176	-0.0627561	0.0738	-0.136556	0.206756	0.78128
ING3	20	169	-0.0967727	0.0395947	-0.136367	0.169646	0.78128
SIRT7	9	180	-0.146891	-0.0114867	-0.135404	0.218525	0.78128
SLC37A2	32	157	-0.0964372	0.0379111	-0.134348	0.0746976	0.78128
TGFB1	13	176	-0.0790403	0.0524056	-0.131446	0.159818	0.78128
PHKG1	11	178	-0.106885	0.0177868	-0.124672	0.248679	0.78128
ZNF679	17	172	-0.0720181	0.0446373	-0.116655	0.239519	0.78128
RFX6	32	157	-0.0650724	0.0334529	-0.0985253	0.129427	0.78128
ADCK5	13	176	-0.110124	-0.0251625	-0.084962	0.218447	0.78128
FOXE3	9	180	-0.077911	0.00591831	-0.0838293	0.296677	0.78128
DTX2	23	166	-0.0897841	-0.0173611	-0.0724229	0.242344	0.78128
VEGFC	51	138	-0.0368532	0.0294925	-0.0663457	0.168844	0.78128
MYL3	46	143	-0.0539524	-0.0155927	-0.0383597	0.277892	0.78128
GNG11	14	175	-0.0651628	-0.0288639	-0.0362989	0.382517	0.78128
SLCO2B1	14	175	-0.0108092	-0.00215949	-0.00864972	0.481316	0.78128
TSSC4	36	153	0.0317755	0.0342261	-0.00245064	0.490646	0.78128
STARD8	9	180	0.0602995	0.0483121	0.0119874	0.518451	0.78128
MPP1	2	187	-0.281677	0.0212784	-0.302956	6.21706e-15	0.786191
DDX46	15	174	-0.346535	-0.0457644	-0.300771	0.0676863	0.786191
GK5	6	183	-0.208065	0.0442477	-0.252312	0.0531178	0.786191
ICAM5	23	166	-0.220786	0.0074833	-0.22827	0.0512071	0.786191
CLEC4C	18	171	-0.173847	0.0507186	-0.224565	0.087805	0.786191
ITGAV	11	178	-0.259616	-0.0587377	-0.200879	0.332785	0.786191
ATP6V1F	18	171	-0.15429	0.0404071	-0.194697	0.133967	0.786191
AIRE	31	158	-0.183027	0.00153681	-0.184564	0.0997684	0.786191
HIST1H4L	18	171	-0.0844862	0.0873908	-0.171877	0.220559	0.786191
PRKCSH	22	167	-0.149802	0.0210159	-0.170818	0.055347	0.786191
HMG20A	20	169	-0.139792	-0.00264508	-0.137147	0.137626	0.786191
GGTLC2	13	176	-0.124146	0.00698976	-0.131136	0.191333	0.786191
ZNF543	13	176	-0.0797243	0.0383238	-0.118048	0.114443	0.786191
NDUFA4	13	176	-0.139327	-0.0234193	-0.115908	0.135671	0.786191
PPP1R1C	12	177	-0.10379	-0.00507446	-0.0987153	0.243951	0.786191
MAPKBP1	23	166	-0.0782567	0.013584	-0.0918407	0.153111	0.786191
EPRS	6	183	-0.114109	-0.0313354	-0.0827733	0.411272	0.786191
STUB1	19	170	-0.0705583	0.00837477	-0.078933	0.192387	0.786191
EPHX4	18	171	-0.0752135	0.00128981	-0.0765033	0.285254	0.786191
PVRL1	34	155	-0.0476493	0.017281	-0.0649303	0.226204	0.786191
CTCF	23	166	-0.0837611	-0.0432663	-0.0404948	0.325552	0.786191
MFRP	32	157	-0.0506636	-0.0337997	-0.016864	0.411728	0.786191
SRBD1	8	181	0.184555	0.153537	0.0310179	0.534632	0.786191
ST8SIA3	75	114	-0.224576	0.122119	-0.346695	0.000959875	0.789888
CACNG6	8	181	-0.225477	0.0421237	-0.267601	0.0332417	0.789888
CD63	11	178	-0.200521	0.0274647	-0.227986	0.0205273	0.789888
LIN37	8	181	-0.229117	-0.0254145	-0.203702	0.192121	0.789888
PAX8	9	180	-0.28835	-0.0862639	-0.202086	0.281137	0.789888
TRIM50	20	169	-0.206676	-0.00893492	-0.197741	0.0634554	0.789888
ATP5J2	17	172	-0.229829	-0.0328519	-0.196977	0.220688	0.789888
PTPN9	14	175	-0.248525	-0.0524218	-0.196103	0.0792738	0.789888
TNPO3	19	170	-0.0844621	0.0947823	-0.179244	0.11838	0.789888
AES	39	150	-0.119572	0.0553753	-0.174947	0.0185112	0.789888
KCNMB1	10	179	-0.185451	-0.0224429	-0.163008	0.140562	0.789888
DDB1	8	181	-0.155305	-0.00546359	-0.149841	0.316949	0.789888
DDX59	5	184	-0.125821	0.016138	-0.141959	0.298697	0.789888
MED26	31	158	-0.151023	-0.0326844	-0.118339	0.0988815	0.789888
SLC34A3	10	179	-0.0892075	0.0265457	-0.115753	0.279484	0.789888
AHSG	7	182	-0.083129	0.0169628	-0.100092	0.23011	0.789888
TPI1	18	171	-0.0783119	0.0103056	-0.0886175	0.284662	0.789888
ACSM1	20	169	-0.0838904	0.000147449	-0.0840379	0.128728	0.789888
CLEC2D	20	169	-0.0855454	-0.00230235	-0.083243	0.145529	0.789888
STK17B	11	178	-0.0486087	0.00305484	-0.0516636	0.336933	0.789888
POLL	30	159	0.0130555	0.0565529	-0.0434974	0.350063	0.789888
PAPD5	20	169	0.0263037	0.0558049	-0.0295013	0.398461	0.789888
CDO1	19	170	0.0330936	0.0364594	-0.00336584	0.488599	0.789888
WDHD1	30	159	-0.0159359	-0.0142163	-0.00171963	0.493699	0.789888
TGDS	37	152	0.0818925	0.0525335	0.0293591	0.595534	0.789888
RABIF	6	183	0.0992291	0.0174394	0.0817897	0.673456	0.789888
HDAC6	21	168	0.218093	0.125661	0.0924319	0.704635	0.789888
EIF3I	20	169	-0.378928	-0.0487393	-0.330188	0.0661321	0.796871
SPOCK3	50	139	-0.295465	-0.0515559	-0.243909	0.0321303	0.796871
ZNF628	11	178	-0.29	-0.0494217	-0.240578	0.0838659	0.796871
KAT2A	19	170	-0.20644	0.0266826	-0.233123	0.0903593	0.796871
DHX35	9	180	-0.208585	0.0219401	-0.230525	0.0598448	0.796871
UBE2M	18	171	-0.203283	0.018369	-0.221652	0.0623124	0.796871
GLCE	8	181	-0.179856	0.0267709	-0.206627	0.0947037	0.796871
C7orf23	15	174	-0.22044	-0.0394535	-0.180986	0.100104	0.796871
TMEM189-UBE2V1	3	186	-0.157263	0.00218903	-0.159452	0.15674	0.796871
CRY1	16	173	-0.120869	0.0300348	-0.150904	0.021617	0.796871
SFTPA1	25	148	-0.107693	0.0142287	-0.121922	0.0779806	0.796871
CR2	7	182	-0.130908	-0.0157676	-0.11514	0.232137	0.796871
KLRK1	19	170	0.0321501	0.142689	-0.110539	0.247893	0.796871
RXFP4	2	187	-0.078642	0.0144802	-0.0931222	0.353184	0.796871
VPS26A	22	167	-0.0608072	0.0289409	-0.0897481	0.184168	0.796871
IFNGR1	32	157	-0.041496	0.0386533	-0.0801493	0.183474	0.796871
HSPB8	16	173	-0.0771768	0.000849449	-0.0780262	0.290007	0.796871
GJD4	38	151	-0.039379	0.0181349	-0.057514	0.200615	0.796871
VIM	50	138	-0.0220609	0.0345323	-0.0565932	0.246232	0.796871
SUB1	4	185	0.0186613	0.0722086	-0.0535473	0.452599	0.796871
CSE1L	5	184	-0.722954	-0.0538093	-0.669145	0.0166891	0.799457
ZNF692	6	183	-0.253237	0.0269934	-0.28023	0.130286	0.799457
HOXD1	9	180	-0.246351	0.00122034	-0.247571	0.0519165	0.799457
BNC1	17	172	-0.245859	0.00162911	-0.247488	0.0287242	0.799457
RYR1	8	181	-0.222949	0.0180454	-0.240995	0.0843463	0.799457
SEC13	25	164	-0.196765	0.0374868	-0.234252	0.0643823	0.799457
BCCIP	37	152	-0.304467	-0.0843359	-0.220131	0.0805257	0.799457
WNK3	16	173	-0.249138	-0.0363071	-0.212831	0.0617557	0.799457
OR2G2	6	183	-0.229093	-0.0170543	-0.212039	0.218953	0.799457
BTAF1	28	161	-0.16961	-0.000888827	-0.168721	0.0918147	0.799457
C5orf45	11	178	-0.156601	0.0090245	-0.165626	0.204379	0.799457
ZNF675	19	170	-0.205274	-0.0493086	-0.155965	0.163917	0.799457
ENPP1	30	159	-0.110312	0.0367401	-0.147052	0.184425	0.799457
KCNT2	6	183	-0.146594	-0.00419422	-0.1424	0.194783	0.799457
EP300	42	147	-0.0693348	0.0714674	-0.140802	0.0806507	0.799457
ALDH3A2	47	142	-0.0899537	0.0363561	-0.12631	0.0359205	0.799457
RNF14	12	177	-0.0841607	0.039412	-0.123573	0.253482	0.799457
NDUFB3	14	175	-0.0914665	0.0158926	-0.107359	0.275184	0.799457
ZNF735	15	174	-0.149666	-0.0476312	-0.102035	0.321533	0.799457
HEPH	8	181	-0.0566358	0.0399039	-0.0965397	0.220842	0.799457
CDC14C	17	172	-0.0538196	0.0408296	-0.0946492	0.253382	0.799457
KCTD4	50	139	-0.0449941	0.0371066	-0.0821007	0.112318	0.799457
PM20D1	5	184	-0.0812544	-0.000849966	-0.0804044	0.32527	0.799457
EFNB2	38	151	-0.0294614	0.0422219	-0.0716833	0.134873	0.799457
EXOG	41	148	0.00360347	0.0703121	-0.0667086	0.20742	0.799457
NFKB1	47	142	-0.0307122	0.01103	-0.0417422	0.323765	0.799457
DPP9	38	151	-0.0407538	-0.00840502	-0.0323488	0.362551	0.799457
NR2F1	23	166	-0.0102726	0.0185914	-0.028864	0.36586	0.799457
DPP8	10	179	-0.0109315	-0.0212478	0.0103163	0.537439	0.799457
ASAH2	99	90	0.00889966	-0.0200781	0.0289777	0.668599	0.799457
GPR35	28	161	0.101521	0.0586312	0.0428894	0.703719	0.799457
ZCCHC7	42	147	0.00371112	-0.0421731	0.0458842	0.643612	0.799457
DZIP3	13	176	-0.229396	0.126151	-0.355547	0.00403292	0.80138
RNF113A	4	185	-0.29554	0.0463614	-0.341902	0.156187	0.80138
SYP	22	167	-0.287595	0.0423547	-0.329949	0.0152082	0.80138
[truncated: 6,134 more rows]

## Sheet: Supplementary file 1C
Supplementary file 1C
Frequency of genetic SF3B1 alterations in cancer
Tumor Type	Frequency of SF3B1 Partial Loss	Frequency of SF3B1 Mutation
all_cancers	0.1084	0.02
Kidney chromophobe	0.7121	0
Bladder urothelial carcinoma	0.3186	0.062
Breast invasive adenocarcinoma	0.202	0.04
Cervical squamous cell carcinoma	0.1559	0.005
Adrenocortical carcinoma	0.1556	0.022
Head and neck squamous cell carcinoma	0.1494	0.014
Cutaneous melanoma	0.1475	0.034
Ovarian serous cystadenocarcinoma	0.1416	0
Lung squamous cell carcinoma	0.1317	0.024
Esophageal carcinoma	0.125	0.014
Uterine carcinosarcoma	0.1071	0.06
Mesothelioma	0.1034	0.018
Liver hepatocellular carcinoma	0.1	0.03
Stomach adenocarcinoma	0.0975	0.021
Pheochromocytoma and Paraganglioma	0.0802	0
Lung adenocarcinoma	0.0738	0.022
Diffuse large B-cell lymphoma	0.0625	0.104
Glioblastoma multiforme	0.0624	0
Brain lower grade glioma	0.0487	0.007
Prostate adenocarcinoma	0.0447	0.033
Kidney renal clear cell carcinoma	0.0436	0
Uterine corpus endometrioid carcinoma	0.0371	0.06
Colon adenocarcinoma	0.0289	0.04
Pancreatic adenocarcinoma	0.0272	0.021
Thyroid carcinoma	0.02	0.005
Kidney renal papillary cell carcinoma	0.0174	0.056
Uveal melanoma	0.0125	0.225
Acute myeloid leukemia	0	0.005

## Sheet: Supplementary file 1D
Supplementary file 1D
KEGG Pathways Enriched from CYCLOPS Gene List
KEGG Pathway	Nominal p-value	FDR q-value
PROTEASOME	>0.01	0.0207993
SPLICEOSOME	>0.01	0.0808658
RIBOSOME	0.0100334	0.360244
PURINE_METABOLISM	0.0170512	0.769899
RNA_POLYMERASE	0.0297143	0.406694
RNA_DEGRADATION	0.0310766	0.505098
DNA_REPLICATION	0.0569395	0.879532
AMINOACYL_TRNA_BIOSYNTHESIS	0.071511	0.782692
NUCLEOTIDE_EXCISION_REPAIR	0.0764263	0.784543
PYRIMIDINE_METABOLISM	0.0774793	0.781041
SYSTEMIC_LUPUS_ERYTHEMATOSUS	0.119675	0.939817
VALINE_LEUCINE_AND_ISOLEUCINE_DEGRADATION	0.121145	1
BASAL_TRANSCRIPTION_FACTORS	0.130184	0.995969
TRYPTOPHAN_METABOLISM	0.131291	0.923511
ETHER_LIPID_METABOLISM	0.144175	1
HUNTINGTONS_DISEASE	0.156627	1
BASE_EXCISION_REPAIR	0.157714	1
GLUTATHIONE_METABOLISM	0.171694	1
CELL_CYCLE	0.171923	1
NOTCH_SIGNALING_PATHWAY	0.256608	1
ALANINE_ASPARTATE_AND_GLUTAMATE_METABOLISM	0.25939	1
OOCYTE_MEIOSIS	0.299694	1
CITRATE_CYCLE_TCA_CYCLE	0.310508	1
VASOPRESSIN_REGULATED_WATER_REABSORPTION	0.318493	1
CYSTEINE_AND_METHIONINE_METABOLISM	0.321267	1
ALZHEIMERS_DISEASE	0.330986	1
RENAL_CELL_CARCINOMA	0.35975	1
UBIQUITIN_MEDIATED_PROTEOLYSIS	0.371312	1
PRIMARY_IMMUNODEFICIENCY	0.381279	1
ENDOCYTOSIS	0.395727	1
FC_GAMMA_R_MEDIATED_PHAGOCYTOSIS	0.407676	1
VIBRIO_CHOLERAE_INFECTION	0.437021	1
TGF_BETA_SIGNALING_PATHWAY	0.444331	1
INOSITOL_PHOSPHATE_METABOLISM	0.444444	1
AMYOTROPHIC_LATERAL_SCLEROSIS_ALS	0.447191	1
EPITHELIAL_CELL_SIGNALING_IN_HELICOBACTER_PYLORI_INFECTION	0.460626	1
CHRONIC_MYELOID_LEUKEMIA	0.472596	1
PHOSPHATIDYLINOSITOL_SIGNALING_SYSTEM	0.481132	1
OXIDATIVE_PHOSPHORYLATION	0.495441	1
ARGININE_AND_PROLINE_METABOLISM	0.497286	1
TYPE_I_DIABETES_MELLITUS	0.506936	1
WNT_SIGNALING_PATHWAY	0.516227	1
TYROSINE_METABOLISM	0.527809	1
GLYCEROPHOSPHOLIPID_METABOLISM	0.559013	1
TASTE_TRANSDUCTION	0.59065	1
PARKINSONS_DISEASE	0.602446	1
HEMATOPOIETIC_CELL_LINEAGE	0.618998	1
B_CELL_RECEPTOR_SIGNALING_PATHWAY	0.631027	1
GALACTOSE_METABOLISM	0.631117	1
CARDIAC_MUSCLE_CONTRACTION	0.631139	1
LONG_TERM_POTENTIATION	0.667375	1
MTOR_SIGNALING_PATHWAY	0.690399	1
PRION_DISEASES	0.725869	1
GLYCEROLIPID_METABOLISM	0.73913	1
LYSOSOME	0.774161	1
HEDGEHOG_SIGNALING_PATHWAY	0.774834	1
SPHINGOLIPID_METABOLISM	0.777381	1
ECM_RECEPTOR_INTERACTION	0.777405	1
TIGHT_JUNCTION	0.783505	1
PATHWAYS_IN_CANCER	0.788	1
PROGESTERONE_MEDIATED_OOCYTE_MATURATION	0.790625	1
ANTIGEN_PROCESSING_AND_PRESENTATION	0.815625	1
ALDOSTERONE_REGULATED_SODIUM_REABSORPTION	0.817768	1
CELL_ADHESION_MOLECULES_CAMS	0.82206	1
REGULATION_OF_ACTIN_CYTOSKELETON	0.827	1
MATURITY_ONSET_DIABETES_OF_THE_YOUNG	0.83208	1
PATHOGENIC_ESCHERICHIA_COLI_INFECTION	0.832237	1
FC_EPSILON_RI_SIGNALING_PATHWAY	0.834719	1
LEUKOCYTE_TRANSENDOTHELIAL_MIGRATION	0.838574	1
LONG_TERM_DEPRESSION	0.853162	1
CALCIUM_SIGNALING_PATHWAY	0.855422	1
T_CELL_RECEPTOR_SIGNALING_PATHWAY	0.869786	1
PEROXISOME	0.871245	1
SELENOAMINO_ACID_METABOLISM	0.875154	1
NICOTINATE_AND_NICOTINAMIDE_METABOLISM	0.876391	1
P53_SIGNALING_PATHWAY	0.879957	1
PANCREATIC_CANCER	0.881104	1
NEUROTROPHIN_SIGNALING_PATHWAY	0.881633	1
ASTHMA	0.900125	1
AMINO_SUGAR_AND_NUCLEOTIDE_SUGAR_METABOLISM	0.906897	1
COMPLEMENT_AND_COAGULATION_CASCADES	0.908894	1
DRUG_METABOLISM_OTHER_ENZYMES	0.910213	1
INSULIN_SIGNALING_PATHWAY	0.910931	1
TYPE_II_DIABETES_MELLITUS	0.918367	1
LINOLEIC_ACID_METABOLISM	0.923171	1
PPAR_SIGNALING_PATHWAY	0.92569	1
FOCAL_ADHESION	0.934608	1
AXON_GUIDANCE	0.938208	1
GNRH_SIGNALING_PATHWAY	0.939487	1
GLYCOLYSIS_GLUCONEOGENESIS	0.93949	1
ADHERENS_JUNCTION	0.940797	1
VASCULAR_SMOOTH_MUSCLE_CONTRACTION	0.940877	1
FRUCTOSE_AND_MANNOSE_METABOLISM	0.945255	1
ARACHIDONIC_ACID_METABOLISM	0.954641	1
VIRAL_MYOCARDITIS	0.955703	1
COLORECTAL_CANCER	0.960784	1
PORPHYRIN_AND_CHLOROPHYLL_METABOLISM	0.964853	1
NEUROACTIVE_LIGAND_RECEPTOR_INTERACTION	0.968	1
GLYCOSPHINGOLIPID_BIOSYNTHESIS_LACTO_AND_NEOLACTO_SERIES	0.97488	1
JAK_STAT_SIGNALING_PATHWAY	0.98794	1
HYPERTROPHIC_CARDIOMYOPATHY_HCM	0.989529	1
METABOLISM_OF_XENOBIOTICS_BY_CYTOCHROME_P450	0.992325	1
SMALL_CELL_LUNG_CANCER	0.993671	1
MELANOMA	0.993757	1
NATURAL_KILLER_CELL_MEDIATED_CYTOTOXICITY	0.993933	1
ERBB_SIGNALING_PATHWAY	0.994819	1
GLYCINE_SERINE_AND_THREONINE_METABOLISM	0.997636	1
MAPK_SIGNALING_PATHWAY	0.998	0.999458
RIG_I_LIKE_RECEPTOR_SIGNALING_PATHWAY	0.998915	1
RETINOL_METABOLISM	0.998957	1
CHEMOKINE_SIGNALING_PATHWAY	0.998995	1
APOPTOSIS	1	1

## Sheet: Supplementary file 1E
Supplementary file 1E
Significantly differentially expressed genes after SF3B1 suppression
Differentially expressed only in SF3B1 loss	Differentially expressed in both	Differentially expressed only in SF3B1 neutral
CDCA5	TFIP11	C4orf48
J01415.4	MRPL55	FAM160B1
J01415.24	MAP1S	RP9
ETV3	CREBZF	NDUFA1
CCNL1	WIPI2	USPL1
RNF103	FAM133B	TRIM25
CTB-31O20.2	CLP1	C20orf3
CDT1	NKIRAS2	GPN3
CYB5A	POP7	NDUFB6
IP6K2	YWHAB	SMN1
E2F6	RBM42	RP11-1100L3.7
DHX8	METTL21D	CGRRF1
TAF1A	CSTF1	PGAM1
SDHAP2	ARMCX6	C7orf42
ADIPOR2	MPHOSPH10	AC016734.2
ZBTB34	COX5B	DERL2
ZNF180	C19orf52	SYF2
MT-CO2	PHF5A	PRPF3
ZNF622	AC098691.1	SEC61B
ZNF292	CTDP1	BCL10
KPNA2	ZNF473	TMBIM6
ZNF317	SNRPC	ATP2B1
CCDC28A	TRMU	MINOS1
ZNF830	KLHL18	SNX15
C15orf24	SLC39A9	VAPA
PIAS1	CNOT8	MRPS12
CTA-29F11.1	C18orf21	TSC22D4
KLHL24	ZFYVE21	ATP5O
SETD1A	PES1	PTP4A2
DSCR3	MBD1	TGOLN2
SMG8	BUD31	CSNK1G2
C1orf27	TPRKB	YWHAQ
TMEM55B	WDR83OS	GUK1
AP000304.2	POP4	COX7A2
FAF2	MOB2	PDXP
DAD1	SKP1	RP11-265N6.2
C16orf91	TMEM70	AC009475.2
ANKRD10	RAE1	CCT8
SNORA68	ANAPC11	SPTSSA
ZBTB43	ATP5J	ANAPC10
AKIRIN2	RP11-718G2.3	PNO1
TSSC4	THUMPD2	MMADHC
NLK	ACTL6A	SRI
ZNF227	SNRPB	WHAMM
BTN2A1	TMCO1	WDR53
CCDC12	TUSC2	MTERFD1
HPS6	BUB3	AP1AR
RAB11A	AC116340.1	AFMID
YKT6	POMP	RP11-38L15.6
WDR85	AURKAIP1	LSG1
MSL3	AL161626.1	CNBP
CTD-2540L5.5	SS18L2	SCNM1
RN7SK	CXXC1	ARL3
ISCU	COX16	EIF2S2P4
MSMO1	PSMD10	SETD8
PIK3R4	ATP6V1D	CDK5
GRB2	VDAC3	MYNN
MRPL50	PSMD14	REXO1
RP11-134E15.2	UBE2N	CRIPT
EIF1AD	TMEM208	RNF185
VOPP1	RPF1	CWC15
YTHDF1	SNRPG	RNF13
MAFB	PFDN1	GTPBP3
IGBP1	AC079949.1	HDGF
SEC61G	NDUFAF1	COMMD1
RNF4	ENY2	CWF19L1
ADIPOR1	BCAP31	GHITM
SNAPC4	MRPL32	NUDT16L1
SRRT	GTF2B	DGUOK
EAF1-AS1	RBX1	NDUFB3
HSPB1P1	DOHH	RAB5C
MT-ND6	BANF1	CHMP2A
SNTB2	PSMD6	NCKAP5L
RPL9P8	EIF4A1P10	TIMM8B
COIL	POLR2F	SNHG12
MTRF1L	RG9MTD1	RBM33
POLR2K	PSMB3	FAM134C
NOA1	UFD1L	TMCO3
MFAP1	CPOX	SHOC2
AC011933.1	TMEM93	SNRNP70
SLCO4A1	ZMPSTE24	XPNPEP3
LZTFL1	NCBP2	ZNF766
METTL13	UQCR11	HARS2
WDR82	NRBP1	MRPL47
MED17	CWC25	SDC1
DUSP12	PPIL3	DPM3
SNORA63	FCF1	PSMC2
FEN1	ASNA1	TWF2
DOLPP1	MRPL52	RAB18
FAU		HERPUD2
MAP2K3		KLHL7
UBE2D1		C20orf24
AC090699.1		C1orf55
PDCL		DCTN3
ARPC5L		BROX
RPL32P29		CHCHD7
UQCR10		NDFIP1
ZNF350		OXSM
ATP6V1E1		GLTPD1
GRWD1		TANK
SH3BP4		RP11-727F15.9
H2AFV		BCL2L12
COX6C		NUDT19
RNMT		TXNL4A
SNORA18		ELL
OAZ1		PFN2
IGBP1-AS2		SNX3
NXF1		C19orf24
EAF1		TIMM21
SPATA2		ATG12
RP11-361D15.2		KCTD5
ASXL2		SRFBP1
RPL18		ZZZ3
POLR2H		AC008073.5
SNIP1		TMUB2
HCFC1		LENG1
C14orf2		LAMP1
PLEKHM1		MFSD5
MCM3		TNFRSF1A
ILKAP		MBIP
INCENP		MAX
RP11-611O2.3		TRIM11
RPL9P9		UBL5
BAG3		C18orf25
CDC5L		RP11-326A19.5
SNORA8		ASUN
SLBP		THAP1
TAF5L		ZNF394
RP11-269F19.2		TMOD3
RNF44		RP11-56B16.5
PCMT1		CANT1
RP11-179H18.8		USP10
MED6		APP
BZW1P2		SUGT1
HUS1		MRPS22
AHSA1		SAP30L
FAM168B		TUT1
ACVR1B		AKAP17A
TMEM109		E2F3
MAP1LC3B		TBCCD1
RASSF3		CXorf40B
TSN		TDP2
NEDD4L		CTB-167B5.1
RAD9A		RCE1
AP003068.9		MAPK8
AC073321.5		MRPL22
POLE3		PRDX4
KDM2A		ATP6V1B2
FAM103A2P		OBFC2B
H3F3BP1		CLINT1
NDUFAB1		CINP
SNRPD2		ELK1
ARF1		ETV5
RBBP5		MUL1
CDCA4		WDR45L
RP1-101K10.6		SPTLC1
CTB-13H5.1		VTA1
RP11-122C9.1		DNAJC15
RPL7		LAPTM4B
METTL9		RP11-91A18.4
AC144449.1		SGTA
AL590762.1		RP1-20N2.6
DDX41		COX7A2L
RPL37		CD99
MT-CO1		C4orf52
RP11-330L19.5		GLO1
MSN		FAM210A
MRPL20		ETNK1
RPL24P4		C5orf51
SMG7		RP11-108L7.7
CTD-2552B11.4		CD99L2
RPS26P6		ZNFX1-AS1
BZW1		RP11-63M22.2
TARBP2		KTI12
DNAJC9		TTC1
NDUFS3		RNF185-AS1
PSMD12		RAC1
KB-1043D8.6		FUCA2
C1D		TM2D2
ACTR5		MORF4L1P1
RP11-466H18.1		RP5-1053E7.1
POLR2B		SHFM1
PATL1		FIS1
ZNF322		MAD2L1BP
ZNF434		MYEOV2
H3F3AP6		YTHDF3
GAPDH		SLC25A46
DRG1		FKBP7
RP11-983P16.4		SUV420H2
PPP4R2		WDR74
C10orf26		SLMO2
ARAF		C7orf59
FRG1		SNRPB2
CCNK		TRAPPC5
ATP6V0D1		TIPRL
SPEN		MTMR12
RLF		CREB3
MRPL54		STRAP
RPS26		C1orf122
EIF4B		C6orf47
HMGN1P3		MRPS28
NFYA		WDR75
PPIL4		CHMP1B
PNISR		RP11-574K11.16
RBM25		PSMB6
SRP14		RBM27
PCGF1		CETN2
TADA1		BAG4
ZNF35		GRPEL2
SNORA7A		C6orf47-AS1
FAM104A		NDUFA6
RP11-1079K10.4		PDCD4
FAM98A		PRELID1
ARFIP1		RPL26L1
ZNF513		GCC1
CTB-54D4.1		MED18
FBXO22		BCAS2
HMGCR		TMEM85
SLC41A1		TRMT1
ATG4A		CNOT7
SNRPD1		RNF135
SLC25A6		INTS12
DGUOK-AS1		TOB2
SMCR7L		PSMA7
NFKBIB		PARL
HSPBP1		PSAP
NDUFB11		MORF4L1
CCT5		ATG4C
CCNE1		LZTS2
EIF4BP7		HSCB
BTG3		BSG
PSMC4		PTRH2
TCP1		GLRX2
ATP6V1G1		TATDN2
RP11-393I23.2		PLEKHB2
ZNHIT3		RP11-247I13.11
POLR1C		TBPL1
EID2		C20orf11
SF3A2		AHDC1
TOPBP1		NDUFS5
KCTD10		TJAP1
HAT1		SPCS2
RBM14		FAM134A
RP1-241P17.4		DHX34
UQCRB		NDUFA12
RSL24D1		RP11-466P24.2
EIF4BP6		POLG2
DCTPP1		OGFR
RPS28		DNAJB2
C1orf52		ATP6V1F
SPIN2B		COX4NB
SFSWAP		RAP1B
ARL6IP5		ZBTB9
EIF2S1		AC020915.4
CCT3		MITD1
MAGEH1		LSM3
BRMS1		SSU72
RNF25		C6orf226
RANBP1		MTMR3
SETD4		PARK7
HSP90AA1		SHCBP1
RPL38		CHMP4B
BCLAF1		MRPL51
RPL31		EXOSC4
HNRNPR		CSNK1G3
H3F3AP4		UBE2L3
RNPEP		ATAD3B
HNRNPL		ZNF212
C3orf39		MKI67IP
RPS15A		ATP6V1H
EIF3E		ORMDL1
AC004797.1		BIRC5
PRPF18		SDHC
CKS2		NDUFA11
HNRNPA2B1		TTI2
RP11-761N21.2		UQCRQ
EIF4A3		SF3B5
PPP1CC		CTB-43P18.1
TMEM9B		AC100748.2
SC5DL		HOTAIRM1
PHB		ARPC4
DDX23		WRAP53
ABRACL		BCS1L
PCBP1		NDUFV2
AC005000.1		CHIC2
TYW3		KIAA0913
SRRM1		C19orf53
DCAF12		CTD-3065J16.9
RPS16		NAA50
MAGT1		FRAT2
RPL15P3		ANKHD1
BTBD10		SCO1
DHX9		RPP40
DDX46		SDF2
WBP11		RPS19BP1
RAB5B		LRRC47
AC034102.1		MBD2
CDC42		PSENEN
BNIP2		CDC26
TMSB4X		PDRG1
ZNF629		ACN9
ERH		HCG18
MRPL42		PAIP2
CD59		TXNL4B
C19orf43		PGS1
DMAP1		ABHD5
SNX12
PSMG2
SNRPE
ALYREF
RP11-2C24.6
TFB2M
EIF3F
POFUT2
CTD-2124B20.1
PKM2
RP11-408P14.1
UBOX5
MRPS35
RP11-166N17.1
PQBP1
C1orf144
GSK3A
H3F3A
RPS7
RPL35A
DBR1
TMEM126A
CALM2P2
UBE2W
FAM32A
ZNF692
RPL6
ALG3
SUMO2
MRPL18
XRCC5
AP000721.4
COX8A
RPL27A
LLPH
AC093106.7
RPS26P8
CALM2
HSPA8
NACA
PPIH
RPL9P7
SAP18
ATF4
AC007318.5
C3orf37
RPP30
HSD17B10
AP2S1
XRCC6
HIVEP2
VDAC2
HSPA14
DCAF13
RP11-83J16.1
MED10
RP4-541C22.4
HNRNPA0
CEBPZ
SNW1
DNAJC7
RP11-800K23.2
COA5
AC009302.2
NDUFB9
MED28
PGK1
RPL19
GLRX5
MED4
MTND1P23
APEX1
TRMT12
EIF3FP3
TTC9C
DBI
RPS13
OSTF1
UGDH
COX6B1
EEF1B2P3
TTF1
HNRNPF
RPS7P11
NSDHL
GLOD4
RPL7AP11
RPS29
CDC37
CLNS1A
TIMM10
AC107983.4
NUDT21
CECR5
MCM5
PSPC1
ZNF90
CTC-260E6.2
FAM98B
PSMC1P5
MRPL10
GABPA
C20orf43
RPS10
AC009245.3
MRRF
CCDC58
AC007969.5
THG1L
KDM3A
NDUFA13
NDUFB4
UBR7
ERP29
TSSC1
ALKBH4
PRPS1
PRPF8
PRPF39
TPT1
IKBKG
RP11-367H5.7
EI24
NSA2
TPRG1L
H2AFZ
RP11-867G23.4
HNRNPA3
PPA1
PSMC1
COX7B
RHBDD2
PRMT5-AS1
USP22
RAB4A
TMSB4XP8
NDUFC1
TEN1
RPS7P1
HNRPLL
AD000091.1
ATG4B
SPR
AL162151.3
TMEM45A
RPL18A
RBM17
SMC3
VPS26A
PFDN2
RRAGB
PSMC1P1
TMEM30A
MIR4426
RP11-475C16.1
RPL18AP3
NDUFA9
EYA3
SNRPEP4
TMSB4XP6
PPP1R16A
COX6A1P2
GNL2
TECR
TBC1D7
AMD1
WARS2
RAB1B
TOR1AIP2
NCBP2-AS1
RPL13AP7
GMNN
RPS19
RPS10P3
RP11-15B17.1
AC112777.1
MGAT5
RPS27A
AC139887.4
PPP2R1A
DIEXF
LARP7
SNRPF
TXN2
KRR1
BCL7A
NARF
BUD13
WDYHV1
AC079250.1
GS1-184P14.2
SSSCA1
RANP1
SNRNP27
RP11-298C3.2
TMEM18
UXT
RP11-464D20.2
AP000936.1
NDUFA8
SNRNP25
MRPS23
RAN
CCDC56
RPS7P10
RP11-148B6.1
AC084031.1

## Sheet: ﻿Supplementary file 1F
Supplementary file 1F
Summary of KEGG pathway enrichment from differentially expressed genes in each class (SF3B1 loss or SF3B1 neutral)
Pathways enriched in SF3B1 loss
Gene Set Name	# Genes in Gene Set (K)	# Genes in Overlap (k)	k/K	p-value	FDR q-value
KEGG_SPLICEOSOME	128	23	0.1797	2.42e-23	2.25e-21
KEGG_RIBOSOME	88	22	0.25	8.61e-26	1.6e-23
KEGG_HUNTINGTONS_DISEASE	185	19	0.1027	7.68e-15	3.57e-13
KEGG_OXIDATIVE_PHOSPHORYLATION	135	17	0.1259	6.65e-15	3.57e-13
KEGG_ALZHEIMERS_DISEASE	169	16	0.0947	3.67e-12	1.14e-10
KEGG_PARKINSONS_DISEASE	133	15	0.1128	1.35e-12	5.03e-11
KEGG_PURINE_METABOLISM	159	7	0.044	0.000606	0.00804
KEGG_ENDOCYTOSIS	183	7	0.0383	0.00137	0.016
KEGG_CARDIAC_MUSCLE_CONTRACTION	80	6	0.075	8.48e-05	0.00225
KEGG_PROSTATE_CANCER	89	6	0.0674	0.000153	0.00285
KEGG_VIBRIO_CHOLERAE_INFECTION	56	5	0.0893	0.000147	0.00285
KEGG_EPITHELIAL_CELL_SIGNALING_IN_H.PYLORI_INFECTION	68	5	0.0735	0.000367	0.00524
KEGG_PYRIMIDINE_METABOLISM	98	5	0.051	0.00192	0.021
KEGG_GNRH_SIGNALING_PATHWAY	101	5	0.0495	0.00219	0.0226
KEGG_OOCYTE_MEIOSIS	114	5	0.0439	0.0037	0.0304
KEGG_NEUROTROPHIN_SIGNALING_PATHWAY	126	5	0.0397	0.00564	0.0437
KEGG_RNA_POLYMERASE	29	4	0.1379	0.000125	0.00285
KEGG_DNA_REPLICATION	36	4	0.1111	0.000296	0.00459
KEGG_N_GLYCAN_BIOSYNTHESIS	46	4	0.087	0.000765	0.00948
KEGG_ADIPOCYTOKINE_SIGNALING_PATHWAY	67	4	0.0597	0.0031	0.0303
KEGG_LONG_TERM_POTENTIATION	70	4	0.0571	0.00363	0.0304
KEGG_NON_HOMOLOGOUS_END_JOINING	14	3	0.2143	0.00024	0.00406
KEGG_BASE_EXCISION_REPAIR	35	3	0.0857	0.00376	0.0304
KEGG_REGULATION_OF_AUTOPHAGY	35	3	0.0857	0.00376	0.0304
Pathways enriched in SF3B1 neutral
Gene Set Name	# Genes in Gene Set (K)	# Genes in Overlap (k)	k/K	p-value	FDR q-value
KEGG_OXIDATIVE_PHOSPHORYLATION	135	15	0.1111	4.02e-15	7.47e-13
KEGG_ALZHEIMERS_DISEASE	169	15	0.0888	1.16e-13	1.07e-11
KEGG_PARKINSONS_DISEASE	133	13	0.0977	1.49e-12	9.22e-11
KEGG_HUNTINGTONS_DISEASE	185	13	0.0703	9.84e-11	4.58e-09
KEGG_SPLICEOSOME	128	9	0.0703	7.81e-08	2.9e-06
KEGG_EPITHELIAL_CELL_SIGNALING_IN_H.PYLORI_INFECTION	68	5	0.0735	5.29e-05	0.00164
KEGG_PROTEASOME	48	4	0.0833	0.000188	0.00499
KEGG_VIBRIO_CHOLERAE_INFECTION	56	4	0.0714	0.000341	0.00794
KEGG_RIG_I_LIKE_RECEPTOR_SIGNALING_PATHWAY	71	4	0.0563	0.000843	0.0174

## Sheet: Supplementary file 1G
Supplementary file 1G
Significantly differentially expressed genes after enhanced SF3B1 expression
Differentially expressed only in SF3B1 neutral	Differentially expressed in both	Differentially expressed only in SF3B1 loss
PDZD9	MIR5047	RNLS
KLHL33	PIH1D1	PRH1
TMEM8A	TFDP1	SQLE
PDAP1	CENPO	TCOF1
RRM2	HNRNPM	GTF2E2
PKD2L2	PDAP1	KBTBD8
AFAP1	TXNDC11	EREG
ZBTB4	TMPO	STIL
OR1L8	EZH2	CCDC137
XPC	PPP2CA	EBF1
DPY19L1	SAE1	P2RY8
PSG3	C8orf82	PPP1R7
JMJD1C-AS1	RHOA	LOC100130238
CENPU	SLBP	NCKAP1L
RND3	TPI1	PASD1
RFX7	DAK	SYT16
TBC1D3C	PPP3CC	NELL1
TPRA1	SLC9A4	CHN2
PRKAG2	GRB2	C1orf141
EIF4E	LRP2BP	TKTL1
FZD2	TMED9	ERICH6
SCARNA22	CLU	CLEC4GP1
BCL9	MAEA	PSMB11
PCDHGC5	NCAPG	TRIM55
DUSP8	CLPTM1	DKFZp686K1684
TEAD4	CASC3	LOC101927817
TPM1	LINC00645	DCDC2B
HSPA6	PRORSD1P	CHAC1
PCDHA13	JRK	HPR
CASKIN2	RNF44	SLC43A2
EDN2	LOC102606465	BCL2A1
JADE1	GIGYF1	PLA2G2A
FAM186A	CCDC93	C6orf229
MARCH7	GOLGA6L17P	YY1AP1
OC90	CACNA1C-AS2	ZDHHC5
KLHL25	CAMTA2	LOC101929746
APOA5	SLC35G5	CCL5
FEZ1	RECQL5	DYNLRB2
ANXA2P2	FAM21A	SEPHS2
PLAC8	TAF1D	GSTA2
DONSON	LOC101927599	COQ9
LOC101928844	LINC00638	DNAJB11
PRMT9	COX10-AS1	SNORA58
ITGA5	AGAP11	PGM3
SOSTDC1	LCN10	S100A5
MPC2	TUBGCP6	NOP16
S100G	GUSBP1	ARHGEF19
CDKN1A	DET1	RNVU1-19
BEND3	BCL2L11	LOC100505549
PIK3IP1	CCDC150	SKA1
ZDHHC20	LPIN1	MUC13
USP39	B4GALNT3	WIBG
COL21A1	CXXC1	HIRIP3
DNAJB1	TTC12	C16orf74
PTGER4	CA9	BIN2
RPS16P5	NDUFAF7	APH1B
CALHM2	ZBED5	PSMD1
OAS2	SNORA21	TNFAIP1
TMEM139	MTERFD2	PRCC
DNMBP	WASH7P	RIPPLY3
CSAG3	LOC100499484-C9ORF174	RTFDC1
DNAJC9	DGKE	ERCC6L
CLEC1A	CTB-118N6.3	FZD9
XAF1	HERC2P2	AKR1C4
ZMYND15	OFD1	FIZ1
MAEA		PDCL
CYP4F11		PHLDA1
ADCY10		PRKACA
CTBP1		TBXA2R
ENTPD4		CDK8
TTC9B		CCNE1
DPPA2		UBC
PAK4		FLRT1
RASL11B		C14orf37
TUSC2		KIF23
TLR8		UCP2
PRX		NRBP1
SGK223		WDR53
BRAT1		DUSP23
TBXA2R		USP3
KIAA0895		RNF10
DRGX		SALL4
BAIAP2		MAGED1
C11orf84		C8orf82
ACTN4		MAPK3
FBLN2		EID1
CORO1B		IFI27L2
ZNF513		NAF1
RIC8B		EMP2
TSPAN9		ZNF596
SKI		POLR3H
CCL5		CRELD2
HSPH1		GYS1
TRIM64		ORC1
OASL		PPP1R3F
C1orf122		RNF8
ASMTL		TXNIP
RAB30		VCP
OPN4		B4GALT1
B4GALT4		FBLN5
BMP4		IMMT
ZNRF1		SLC52A3
SP110		MED10
KANK1		ECE1
CCNA2		MED27
EMP1		ABCC6
CADM4		FAM13C
SF3B1		SGMS1
SPRN		LRRC59
SMIM17		GBGT1
MIER2		KIAA1279
MIR3652		FKBP2
NMNAT2		STUB1
GTSE1		MAPK8IP2
SOGA3		DAP
ZBED1		FANCG
HELZ2		C3orf18
LOC101927196		MCM3
SELE		KRT78
PSG9		UCKL1-AS1
HSPA7		ALKBH5
APBA1		DUSP7
GTF2E1		MCCC2
ZNF446		MIR5047
MLLT1		HILPDA
ZNF672		IGSF10
PTGES3L		RAB8A
UBTD1		TBL3
BCAR4		ZNF791
SCN1B		ESCO2
BHLHE23		SPATA25
SLC27A1		RHBDD2
ARPC2		SHC1
HVCN1		MIA-RAB4B
RPL13		PIGV
LOC101927502		DGUOK-AS1
AKR1B10		DNASE1L3
VDAC1		FMR1NB
DNAH17		PSCA
TNFRSF21		ODAM
PTTG1IP		KRT20
ACTN1		LOC339874
RTL1		ELF5
OR4D1		TNFAIP8L3
EFCAB14		LOC283299
MKL1		CAPN13
FAM111B		NLRP9
HGC6.3		CABP4
PTGR1		HP09025
DEXI		IFI44L
CKAP4		LOC101927666
MAFK		RIMBP2
RCSD1		FMN2
TNFRSF1A		PLCXD3
ESYT3		SETD8
PGCP1		POU5F1B
TWSG1		FABP2
NEDD9		LRRK2
SAP30BP		TNFRSF19
CSRP3		ZBED8
PCDHA3		SLC38A7
ZP4		OSER1-AS1
ATL1		LMLN
CHMP4B		SNORA70F
P2RY14		SLC22A18
SLC6A14		FAM66E
TWF2		MAN1C1
LOC100506548		USP35
C1orf95		HERC2P4
SSBP1		IMPG2
GAS6		EEF2
DCLK3		CDK20
PLCG2		TOP1MT
LOC101927043		NFATC4
CCDC101		SYN2
NBPF10		CCDC114
GOLGA8R		FAM134A
TMEM178B		EFCAB6
IFT46		CLDN9
C11orf74		PPAPDC3
SLC13A3		SMAD7
SLC24A4		CLMN
LINC01353		AP5Z1
CRYBG3		TMEM178A
CEBPA-AS1		CSNK1E
ALG1		PCSK4
MACF1		MYEOV
MYO16-AS1		ENTHD2
CACNA1C-AS2		FOXRED2
LOC101927688		BRWD1-IT2
LOC100132111		HSD11B1L
ATP1A3		ASPSCR1
LINC00051		UAP1L1
MANSC4		LRFN5
C12orf42		PAQR7
AKR1C6P		CECR7
ATP4B		GLIS2
ANKRD62P1-PARP4P3		C9orf173
ZNF679		DUSP3
SERPINA3		LOC101927391
KRT14		NRG2
CHAD		FGFR3
LMAN1L		KMT2E-AS1
LOC101927087		CLIC6
ZP1		KLHDC1
SFRP2		CNNM2
PRMT8		GFOD1
CASC14		GAS2L3
RAG2		ZNF510
AOC1		C14orf93
FAM124B		NAT6
APBB1IP		ZNF729
NTRK3-AS1		TMTC2
LOC101927394		SLC7A6OS
MAB21L2		BRWD1-AS1
LOC100287225		OR2B6
PLEKHG7		VSTM2A
MAATS1		ACR
C11orf87		PANDAR
POPDC3		DHH
GJA1		LGI4
WDR13		LINC00927
BCCIP		CCL22
GAL		SELP
OR11H12		KCNE4
LPAR3		SEMA3E
ADAT2		SI
KIF17		PGR
MRPL15		HNRNPH2
POU4F1		FENDRR
KRTAP19-1		ARHGEF28
NPTX2		RASGRP2
LYRM7		GCNT4
PLK5		CPEB1
GTF2A1L		ZNF205
HLA-DRB5		SYT11
BEX5		KIAA1211
ELAVL4		MCF2
NKPD1		RAB20
NOP2		A1BG-AS1
KCNV1		AGAP11
ZNF192P1		DAGLA
LINC01125		KANSL1L
MMP17		SEMA4A
MATK		KIAA1328
THUMPD2		APOL2
DCUN1D5		EIF3J-AS1
SLC35A5		HIPK4
CNTNAP3		OTUD1
CDH22		SPECC1
HBE1		B3GAT2
LOC100996455		TAS2R3
TBC1D24		PRPF40B
BTNL9		FOXC1
UBN2		FAM27E3
FAM175A		PITPNM3
OFD1		LOC643072
NOL6		PHF21B
MDM2		GRHL1
LAMC3		MBOAT1
TMCC1-AS1		MRPS31P5
C1orf131		TPRN
SSR3		TOLLIP
DROSHA		FAM225B
COL25A1		SHF
LINGO2		KCNJ11
PRPF3		MTURN
SLC1A3		PRR26
CWC15		MYO7A
BCL6B		LPIN2
TRIM65		ZBED6CL
C22orf46		IRS2
LRP1B		SERTAD2
IGFBP2		ZNF578
CAMLG		MSL3
ADORA2B		EML6
MGC12916		LRRC56
PCDHGA6		HIST1H3E
C1orf101		GATA2
CCDC86		EBF3
CNPY1		ZBTB6
ATP8A1		POLL
RFT1		STON1
GABRB2
SLC19A1
TRIM68
HTR6
ADAMTS14
ADCK3
GPLD1
CHGA
BTF3L4
LRRC63
LOC100996255
ZNF263
TENM4
LOC284648
ZNF493
UGT1A8
SLC27A2
GPR111
BBOX1
POLR3G
LINC01123
GOLGA8J
P2RY1
UNC5D
VDR
ZNF33B
NKX3-1
LYPLAL1
INPP5D
EIF2S3
WNT10B
ANKRD19P
STAB1
GPR98
POLR3E
ULK4
SCO1
SPATA17
CAMKV
SEC16B
MLF1
TIMM8A
RABGGTB
CARD9
EOMES

## Sheet: Supplementary file 1H
Supplementary file 1H
Gene	Application	Forward Sequence (5' to 3')	Reverse Sequence (5' to 3')
SF3B1	qPCR	ccaaagattgcagaccggga	tcaggggttttccctccatc
Actin	qPCR	gctgtgctacgtcgccct	ggaggagctggaagcagcc
U2 snRNA	qPCR	ctcggccttttggctaagat	cgttcctggaggtactgcaa
5.8s rRNA	qPCR	ggtggatcactccggctcgt	gcaagtgcgttcgaagtgtc
MCL1	alternative splicing, agarose electrophoresis	gaggaggaggaggacgagtt	accagctcctactccagcaa
AARS	intron retention, qPCR	TGGAAAGGAAAGCAAGGAAA	CCAAGCCTGCCTGGTATTTA
CALR	intron retention, qPCR	GGGAGTGCACCAACCTTACT	CTGCAGAAGGGAGAAGGAAA
DNAJB1	intron retention, qPCR	AGTATTTCCGCGTAGCCTGA	CTTCCTACGCACCATTAGCC
MKNK2	intron retention, qPCR	CCTATGGTGAGGCTCCATGT	CCTCCAATCTCCTTGCAGAA
MYH9	intron retention, qPCR	GAGACAAGGAAGCCTTGGTG	TTTCTTGGGCCATCTCTGTT
RPS8	intron retention, qPCR	TGAGAAGGCTGTTGTGTTGG	TACCCAATGCTTCCCATTTC
RPS18	intron retention, qPCR	TGAGGGCAGGATTAGAGGAA	GGGGCAAGGGATGTTTTATC
SLC7A5	3' splice site, agarose electrophoresis	GCAAAGAGGCCGCTGTATAA	GAACTGCTACAGCGTGAAGG
CELSR1	3' splice site, agarose electrophoresis	AGGTCCACGAAGGAGATGGT	TCTACAATGGCTGTCCCAAA
