# Supplementary figures and images for: Copy-number and gene dependency analysis reveals partial copy loss of wild-type SF3B1 as a novel cancer vulnerability
Source: eLife journal article supplement (doi:10.7554/elife.23268), 2017-02-08

## Figure 2-figure supplement 2

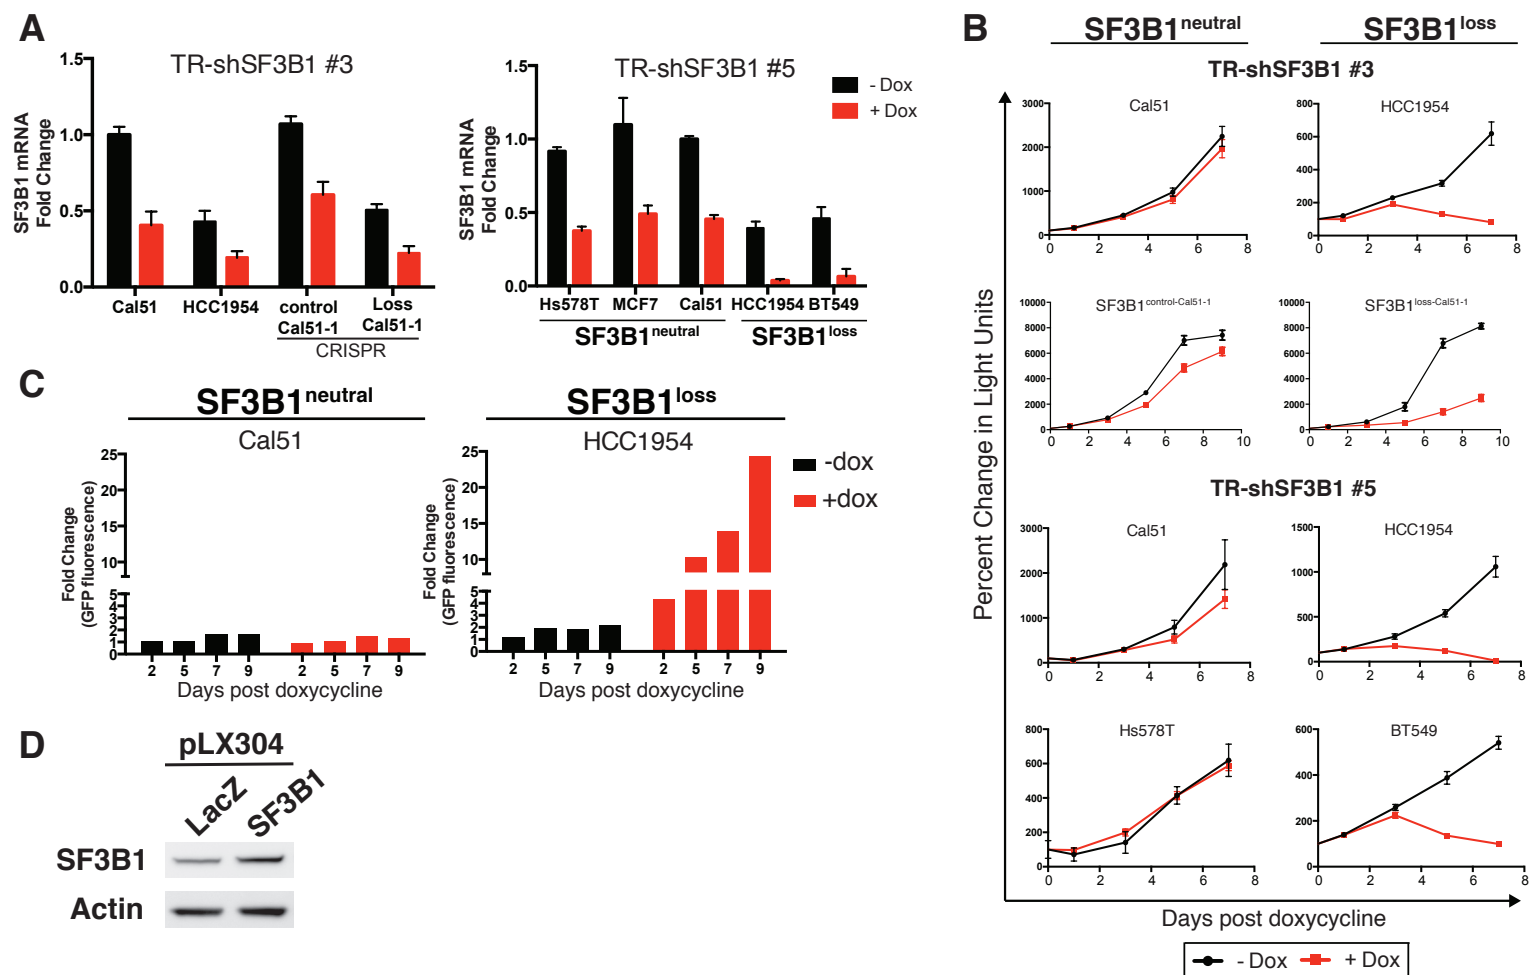

Figure 2-figure supplement 2. Characterization of SF3B1 as a CYCLOPS gene.

Supplement: supp [file elife-23268-supp-v1.zip]

# Figure 2-figure supplement 1

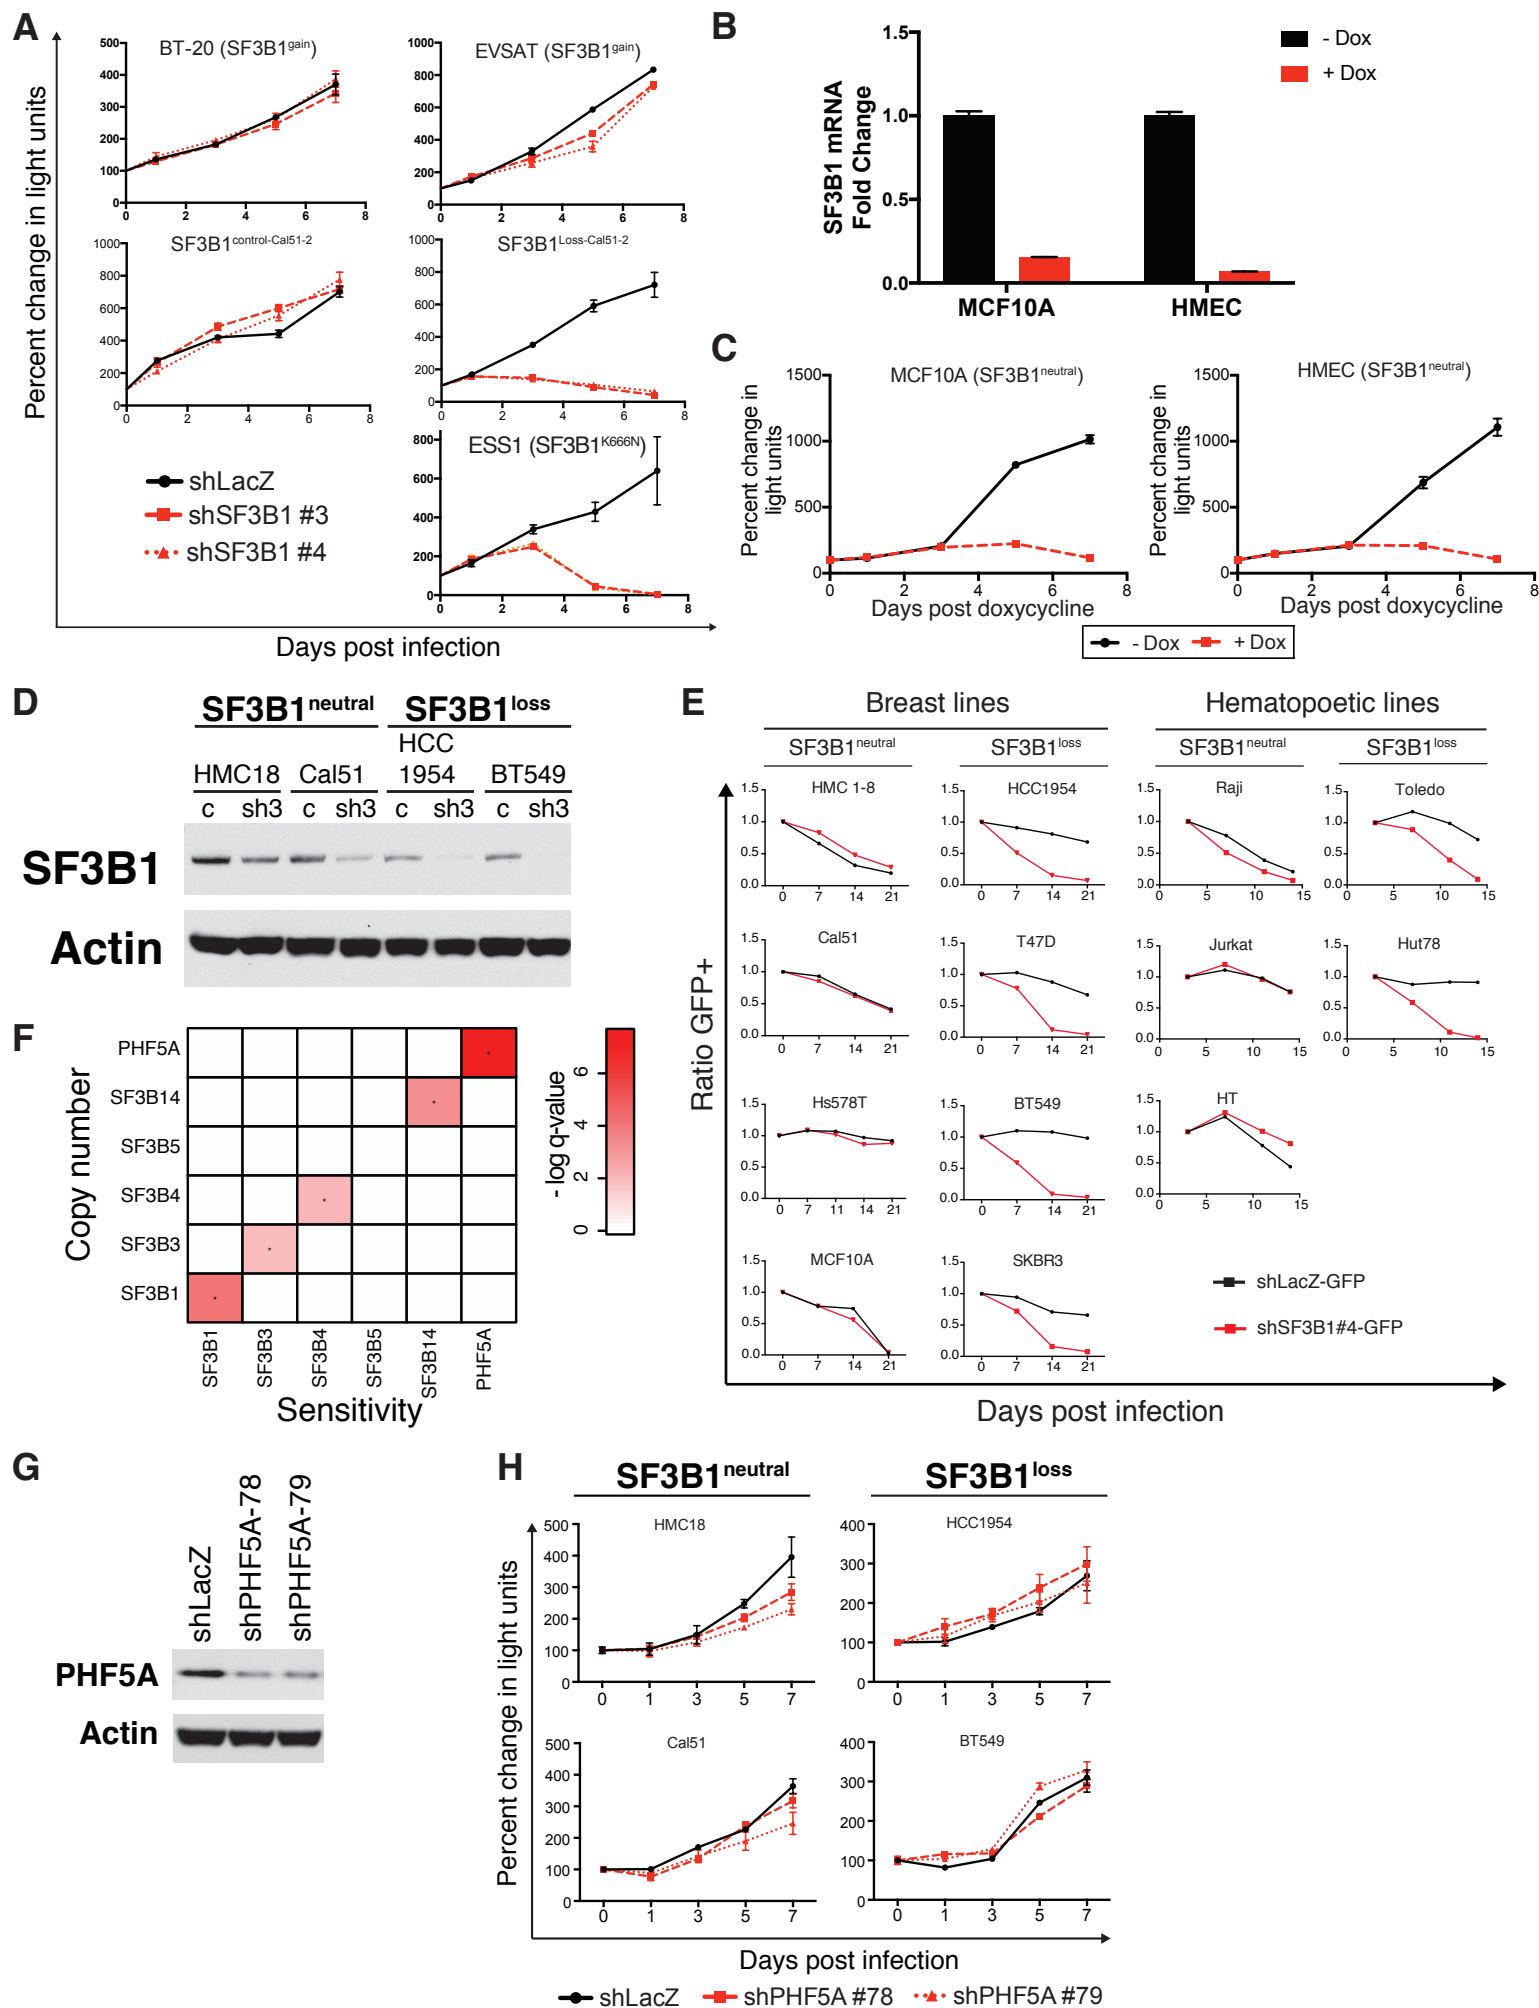

Figure 2-figure supplement 1. Characterization of SF3B1 as a CYCLOPS gene.

Supplement: supp [file elife-23268-supp-v1.zip]
